# Supplementary material for: Long Span DNA Paired-End-Tag (DNA-PET) Sequencing Strategy for the Interrogation of Genomic Structural Mutations and Fusion-Point-Guided Reconstruction of Amplicons
Source: PubMed Central journal article supplement (PMC3461012; doi:10.1371/journal.pone.0046152), 2012-09-28

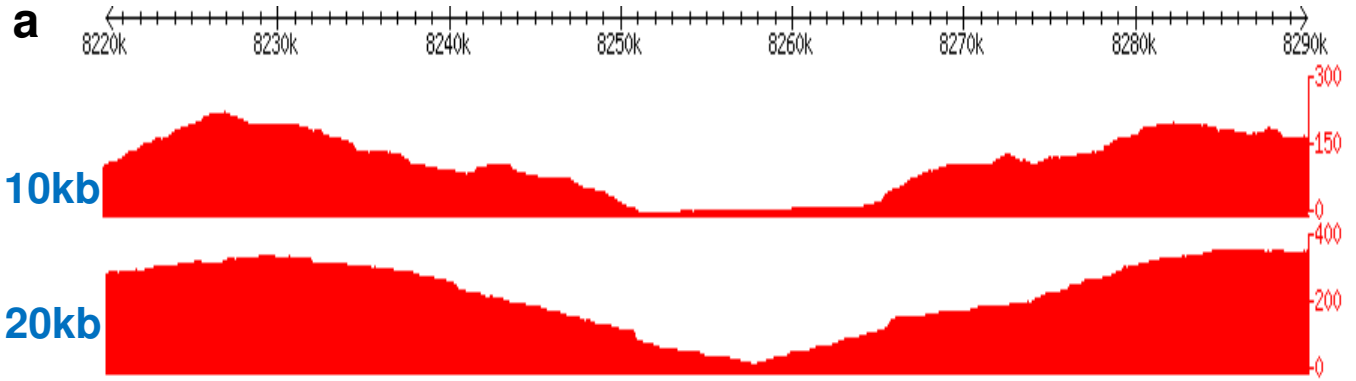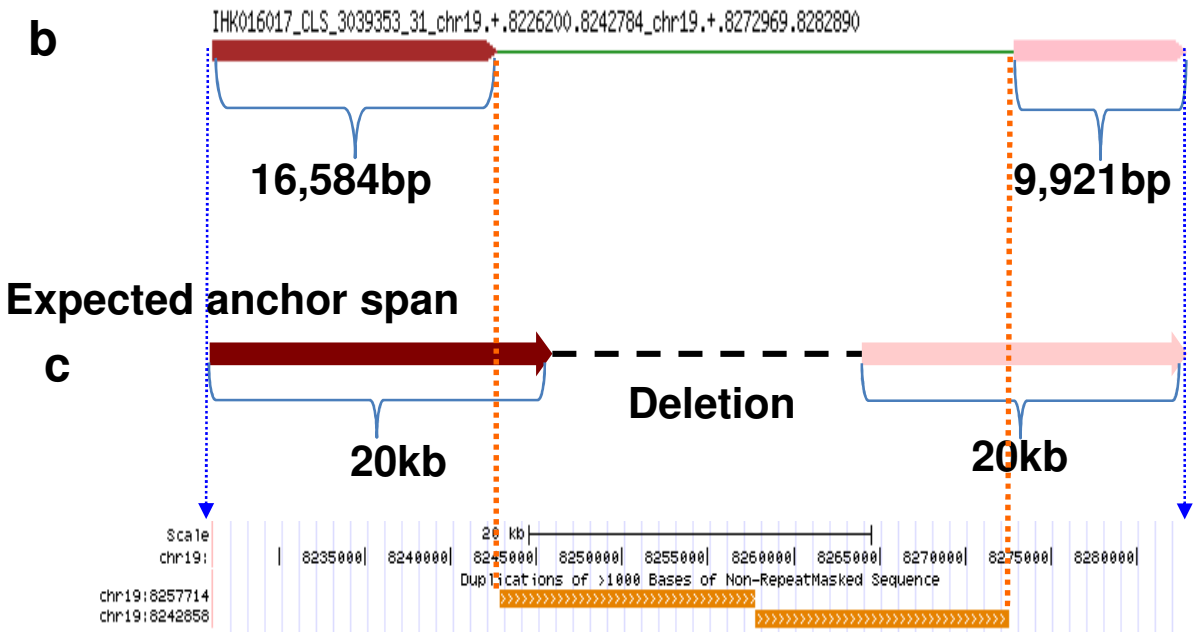

Supplement: pone.0046152.s015.pdf [file pone.0046152.s015.pdf]
