# Supplementary material for: Long Span DNA Paired-End-Tag (DNA-PET) Sequencing Strategy for the Interrogation of Genomic Structural Mutations and Fusion-Point-Guided Reconstruction of Amplicons
Source: PLoS One. 2012 Sep 28;7(9):e46152. doi: 10.1371/journal.pone.0046152 (PMC3461012; doi:10.1371/journal.pone.0046152)
Supplement: Table S2 — dPET cluster statistics. (XLS) [file pone.0046152.s002.xls]

## Sheet: Table S2.
Library	Total D-PET	Singleton	Cluster 2	Cluster 3	Cluster 4	Cluster 5	cluster >5
MCF7 1kb	736586	728445	1330	1176	928	625	4082
%	1	0.988948	0.00180563	0.00159655	0.00125987	0.000857992	0.0055
MCF7 10kb	2139676	2119094	1268	459	388	385	18082
%	1	0.990381	0.000592613	0.000216602	0.000181336	0.000181681	0.0085
HCT116 1kb	1693263	1688547	850	555	488	385	2438
%	1	0.997215	0.000501989	0.000328685	0.000288201	0.000228007	0.0014
HCT116 10kb	2672454	2661375	1330	462	320	285	8682
%	1	0.995854	0.00049767	0.000173594	0.00011974	0.000107088	0.0032
K562 1kb	2177687	2157688	5430	1560	1236	1175	10598
%	1	0.990816	0.00249347	0.000722996	0.000567575	0.000544564	0.0049
K562 10kb	3804142	3771859	3682	894	636	495	26576
%	1	0.991514	0.000967892	0.000237018	0.000167186	0.000131235	0.007
K562 20kb	3146984	3103814	10888	3048	1504	820	26910
%	1	0.986282	0.00345982	0.000968546	0.000477918	0.000260567	0.0086
