# Supplementary material for: Long Span DNA Paired-End-Tag (DNA-PET) Sequencing Strategy for the Interrogation of Genomic Structural Mutations and Fusion-Point-Guided Reconstruction of Amplicons
Source: PLoS One. 2012 Sep 28;7(9):e46152. doi: 10.1371/journal.pone.0046152 (PMC3461012; doi:10.1371/journal.pone.0046152)
Supplement: Table S6 — MCF-7 structural variations. (XLS) [file pone.0046152.s006.xls]

## Sheet: Deletion
ID	Location	Span	1kb count	10kb count	Supercluster count
Deletion1	chr10:78011182..78025344	14162	2	2	1
Deletion2	chr12:89006776..89019066	12290	2	2	1
Deletion3	chr16:18738163..18747911	9748	2	2	1
Deletion4	chr17:59308388..59328518	20130	2	2	1
Deletion5	chr18:45948358..45952682	4324	2	2	1
Deletion6	chr23:85491536..85508137	16601	2	2	1
Deletion7	chr6:34038073..34055922	17849	2	2	1
Deletion8	chr1:247094713..247103588	8875	2	3	1
Deletion9	chr1:84289862..84301817	11955	2	3	1
Deletion10	chr10:5273004..5284101	11097	2	3	1
Deletion11	chr19:35076524..35088243	11719	2	3	1
Deletion12	chr7:158790863..158817630	26767	2	3	1
Deletion13	chr4:76796874..76890803	93929	2	4	1
Deletion14	chr4:94775386..94787117	11731	2	4	1
Deletion15	chr8:580580..590339	9759	2	4	1
Deletion16	chr1:208142669..208159912	17243	2	5	1
Deletion17	chr2:119368076..119382387	14311	2	5	1
Deletion18	chr5:140202254..140220441	18187	2	5	1
Deletion19	chr20:14921177..15147172	225995	2	6	1
Deletion20	chr18:24522837..24533277	10440	2	7	1
Deletion21	chr3:63053851..63417803	363952	2	7	1
Deletion22	chr3:89588116..89600196	12080	2	7	1
Deletion23	chr4:20769101..20779605	10504	2	7	1
Deletion24	chr20:7043924..7055787	11863	2	9	1
Deletion25	chr4:183064957..183860169	795212	2	9	1
Deletion26	chr4:75860606..75868235	7629	2	9	1
Deletion27	chr12:33024449..44021705	10997256	2	10	2
Deletion28	chr7:68765653..68834758	69105	2	10	1
Deletion29	chr7:69635775..69891732	255957	2	11	1
Deletion30	chr7:93251743..93262683	10940	2	11	1
Deletion31	chr6:67064927..67106938	42011	2	13	1
Deletion32	chr15:53003990..53012192	8202	2	14	1
Deletion33	chr16:16841814..16850192	8378	2	14	1
Deletion34	chr2:4758047..4767705	9658	2	14	1
Deletion35	chr8:106854866..124773405	17918539	2	14	1
Deletion36	chr4:91814999..91824499	9500	2	15	1
Deletion37	chr9:103699404..103708238	8834	2	20	1
Deletion38	chr2:150739033..150747424	8391	2	24	1
Deletion39	chr1:199999266..200254331	255065	2	25	1
Deletion40	chr8:129972165..132903766	2931601	2	26	3
Deletion41	chr1:109167485..109177974	10489	3	2	1
Deletion42	chr2:172611584..172624121	12537	3	2	1
Deletion43	chr5:127430655..127442710	12055	3	2	1
Deletion44	chr8:63414227..63428051	13824	3	2	1
Deletion45	chr13:56649471..56693329	43858	3	3	1
Deletion46	chr2:83951228..83961466	10238	3	3	1
Deletion47	chr8:40891178..40901690	10512	3	3	1
Deletion48	chr11:48320472..48332900	12428	3	4	2
Deletion49	chr13:49967064..49981918	14854	3	4	1
Deletion50	chr3:32076667..32083744	7077	3	4	1
Deletion51	chr10:6450526..6458222	7696	3	5	1
Deletion52	chr6:85372456..85381397	8941	3	5	1
Deletion53	chr11:28962559..28973154	10595	3	6	1
Deletion54	chr3:113584293..113597796	13503	3	6	1
Deletion55	chr4:59623510..59635023	11513	3	6	1
Deletion56	chr2:141683788..141829661	145873	3	7	2
Deletion57	chr23:11863104..11870611	7507	3	7	1
Deletion58	chr4:79486247..79494372	8125	3	7	1
Deletion59	chr5:166733064..166743606	10542	3	7	1
Deletion60	chr1:179933423..180645544	712121	3	8	1
Deletion61	chr8:135147926..135160306	12380	3	8	1
Deletion62	chr9:23352742..23367859	15117	3	11	1
Deletion63	chr6:155359032..169778266	14419234	3	16	1
Deletion64	chr5:83983069..83991685	8616	3	20	1
Deletion65	chr4:173661456..173671979	10523	3	21	1
Deletion66	chr9:21824344..22071292	246948	3	21	2
Deletion67	chr11:1871478..1894408	22930	3	24	3
Deletion68	chr1:105229273..105230474	1201	3		1
Deletion69	chr1:108203909..108207045	3136	3		1
Deletion70	chr1:115597861..115599249	1388	3		1
Deletion71	chr1:148958075..148959654	1579	3		1
Deletion72	chr1:179309728..179311246	1518	3		1
Deletion73	chr1:183639268..183640146	878	3		1
Deletion74	chr1:185731178..185733779	2601	3		1
Deletion75	chr1:186805360..186807361	2001	3		1
Deletion76	chr1:201330900..201331897	997	3		1
Deletion77	chr1:212836310..212837185	875	3		1
Deletion78	chr1:216312065..216313799	1734	3		1
Deletion79	chr1:227439453..227440444	991	3		1
Deletion80	chr1:56603642..56608129	4487	3		1
Deletion81	chr1:62924022..62924823	801	3		1
Deletion82	chr1:71513863..71514474	611	3		1
Deletion83	chr10:103435318..103436538	1220	3		1
Deletion84	chr10:119623979..119625013	1034	3		1
Deletion85	chr10:124206724..124207366	642	3		1
Deletion86	chr10:134435132..134436670	1538	3		1
Deletion87	chr10:134577457..134578347	890	3		1
Deletion88	chr10:18543016..18543734	718	3		1
Deletion89	chr10:41705216..41716872	11656	3		3
Deletion90	chr10:54110568..54111767	1199	3		1
Deletion91	chr10:54529981..54531273	1292	3		1
Deletion92	chr10:6291416..6293640	2224	3		1
Deletion93	chr10:73494445..73495347	902	3		1
Deletion94	chr10:815177..816961	1784	3		2
Deletion95	chr10:88655911..88656903	992	3		1
Deletion96	chr10:99098040..99099314	1274	3		1
Deletion97	chr11:1329724..1331038	1314	3		1
Deletion98	chr11:31872199..31873702	1503	3		1
Deletion99	chr11:37622639..37623703	1064	3		1
Deletion100	chr11:47844090..47844768	678	3		1
Deletion101	chr11:5715794..5719021	3227	3		1
Deletion102	chr11:58350598..58352756	2158	3		1
Deletion103	chr11:60863908..60865218	1310	3		1
Deletion104	chr11:69109772..69110810	1038	3		1
Deletion105	chr11:7165810..7166660	850	3		1
Deletion106	chr11:74209625..74210789	1164	3		1
Deletion107	chr12:125470162..125471618	1456	3		1
Deletion108	chr12:126603735..126604960	1225	3		1
Deletion109	chr12:131498630..131500411	1781	3		1
Deletion110	chr12:13943586..13944117	531	3		1
Deletion111	chr12:17507392..17509896	2504	3		1
Deletion112	chr12:22020757..22022902	2145	3		1
Deletion113	chr12:24050905..24052386	1481	3		1
Deletion114	chr12:26402295..26403270	975	3		1
Deletion115	chr12:30262196..30263338	1142	3		1
Deletion116	chr12:4952393..4953470	1077	3		1
Deletion117	chr12:5091610..5094310	2700	3		1
Deletion118	chr12:52530974..52532018	1044	3		1
Deletion119	chr12:67541882..67542930	1048	3		1
Deletion120	chr12:70642329..70644568	2239	3		1
Deletion121	chr12:77721490..77722539	1049	3		1
Deletion122	chr12:93867849..93868799	950	3		1
Deletion123	chr12:94757717..94761089	3372	3		1
Deletion124	chr13:100704404..100705372	968	3		1
Deletion125	chr13:102807123..102808680	1557	3		1
Deletion126	chr13:104505980..104507333	1353	3		1
Deletion127	chr13:105246655..105248283	1628	3		1
Deletion128	chr13:20628535..20630089	1554	3		1
Deletion129	chr13:26759729..26760610	881	3		1
Deletion130	chr13:37954716..37958202	3486	3		1
Deletion131	chr13:44903044..44903842	798	3		1
Deletion132	chr13:62541075..62542556	1481	3		2
Deletion133	chr13:72972589..72974254	1665	3		1
Deletion134	chr13:77894752..77897049	2297	3		1
Deletion135	chr13:87801253..87802131	878	3		1
Deletion136	chr14:100405105..100407403	2298	3		1
Deletion137	chr14:19620354..19625896	5542	3		1
Deletion138	chr14:22991841..22992756	915	3		1
Deletion139	chr14:28797530..28799156	1626	3		1
Deletion140	chr14:33359730..33360550	820	3		1
Deletion141	chr14:43657797..43661861	4064	3		1
Deletion142	chr14:50478532..50479551	1019	3		1
Deletion143	chr14:53780060..53784486	4426	3		1
Deletion144	chr14:70507310..70508277	967	3		1
Deletion145	chr14:77318864..77320508	1644	3		1
Deletion146	chr15:32796300..32797280	980	3		1
Deletion147	chr15:53442065..53444651	2586	3		1
Deletion148	chr15:60493195..60495230	2035	3		1
Deletion149	chr15:64420382..64421647	1265	3		1
Deletion150	chr15:66836379..66837064	685	3		1
Deletion151	chr15:69672446..69673322	876	3		1
Deletion152	chr15:91316588..91317597	1009	3		1
Deletion153	chr16:11908664..11910330	1666	3		1
Deletion154	chr16:22955145..22957391	2246	3		1
Deletion155	chr16:23667626..23669997	2371	3		1
Deletion156	chr17:14129999..14132613	2614	3		1
Deletion157	chr17:18730912..18733175	2263	3		1
Deletion158	chr17:29896584..29899057	2473	3		1
Deletion159	chr17:54717703..54720760	3057	3		1
Deletion160	chr17:72498555..72499545	990	3		1
Deletion161	chr17:73068820..73070559	1739	3		1
Deletion162	chr17:76331924..76333450	1526	3		1
Deletion163	chr17:8187150..8189329	2179	3		1
Deletion164	chr18:21146135..21147019	884	3		1
Deletion165	chr18:22081561..22083490	1929	3		1
Deletion166	chr18:30784937..30785792	855	3		1
Deletion167	chr18:3986812..3988075	1263	3		1
Deletion168	chr18:41069453..41071039	1586	3		1
Deletion169	chr18:48716391..48717512	1121	3		1
Deletion170	chr19:4569128..4570743	1615	3		1
Deletion171	chr19:60296160..60297972	1812	3		1
Deletion172	chr19:61802562..61803918	1356	3		1
Deletion173	chr2:101463884..101464702	818	3		1
Deletion174	chr2:101598548..101600344	1796	3		1
Deletion175	chr2:142111864..142113627	1763	3		1
Deletion176	chr2:150466455..150468013	1558	3		1
Deletion177	chr2:159369783..159371301	1518	3		1
Deletion178	chr2:162039893..162042593	2700	3		1
Deletion179	chr2:182063996..182064634	638	3		1
Deletion180	chr2:183023849..183024422	573	3		1
Deletion181	chr2:201854821..201857853	3032	3		1
Deletion182	chr2:212259465..212260459	994	3		1
Deletion183	chr2:214483243..214484595	1352	3		1
Deletion184	chr2:217663425..217665755	2330	3		1
Deletion185	chr2:239164880..239166919	2039	3		1
Deletion186	chr2:240607538..240607988	450	3		1
Deletion187	chr2:28206814..28207881	1067	3		1
Deletion188	chr2:2889187..2890435	1248	3		1
Deletion189	chr2:34376959..34380055	3096	3		1
Deletion190	chr2:34497070..34498290	1220	3		1
Deletion191	chr2:38924407..38926084	1677	3		1
Deletion192	chr2:40831259..40832080	821	3		1
Deletion193	chr2:485022..486186	1164	3		1
Deletion194	chr2:6317048..6319790	2742	3		1
Deletion195	chr2:82193551..82194496	945	3		1
Deletion196	chr2:898289..899787	1498	3		1
Deletion197	chr20:1337128..1339030	1902	3		1
Deletion198	chr20:17975754..17976973	1219	3		1
Deletion199	chr20:39339619..39341720	2101	3		1
Deletion200	chr20:41457559..41459449	1890	3		1
Deletion201	chr20:61236097..61237456	1359	3		1
Deletion202	chr20:62372514..62373431	917	3		1
Deletion203	chr21:41323622..41325132	1510	3		1
Deletion204	chr21:44674569..44675238	669	3		1
Deletion205	chr21:46602598..46604181	1583	3		1
Deletion206	chr22:42561217..42562383	1166	3		1
Deletion207	chr23:143234627..143238603	3976	3		1
Deletion208	chr23:4914398..4915728	1330	3		1
Deletion209	chr3:126418839..126420660	1821	3		1
Deletion210	chr3:127841495..127842154	659	3		1
Deletion211	chr3:133160099..133160974	875	3		1
Deletion212	chr3:147414548..147415136	588	3		1
Deletion213	chr3:155578495..155579922	1427	3		1
Deletion214	chr3:172702536..172704073	1537	3		1
Deletion215	chr3:181136717..181137940	1223	3		1
Deletion216	chr3:188308591..188309861	1270	3		1
Deletion217	chr3:193545409..193546875	1466	3		1
Deletion218	chr3:195865343..195865895	552	3		2
Deletion219	chr3:70497591..70498165	574	3		1
Deletion220	chr3:76861981..76863031	1050	3		1
Deletion221	chr3:83018988..83019908	920	3		1
Deletion222	chr4:104004529..104005391	862	3		1
Deletion223	chr4:108496139..108499824	3685	3		1
Deletion224	chr4:125891003..125892248	1245	3		1
Deletion225	chr4:144792093..144793727	1634	3		1
Deletion226	chr4:146658129..146660441	2312	3		1
Deletion227	chr4:165422101..165426460	4359	3		1
Deletion228	chr4:167327052..167328220	1168	3		1
Deletion229	chr4:16811466..16812633	1167	3		1
Deletion230	chr4:29269658..29270972	1314	3		1
Deletion231	chr4:42599837..42601454	1617	3		1
Deletion232	chr4:66323484..66324706	1222	3		1
Deletion233	chr4:82210086..82211606	1520	3		1
Deletion234	chr4:86529166..86529879	713	3		1
Deletion235	chr4:86782812..86783826	1014	3		1
Deletion236	chr4:88250977..88252076	1099	3		1
Deletion237	chr4:93787440..93789363	1923	3		1
Deletion238	chr5:10326131..10329167	3036	3		1
Deletion239	chr5:11391869..11392815	946	3		1
Deletion240	chr5:114784292..114786415	2123	3		1
Deletion241	chr5:114996534..114998126	1592	3		1
Deletion242	chr5:12478554..12480255	1701	3		1
Deletion243	chr5:13947823..13948843	1020	3		1
Deletion244	chr5:2021377..2025338	3961	3		2
Deletion245	chr5:21485127..21488471	3344	3		1
Deletion246	chr5:23938543..23941650	3107	3		1
Deletion247	chr5:33236096..33237082	986	3		1
Deletion248	chr5:3690161..3692508	2347	3		1
Deletion249	chr5:519958..521699	1741	3		1
Deletion250	chr5:73684419..73685337	918	3		1
Deletion251	chr5:78312477..78314371	1894	3		1
Deletion252	chr5:80074455..80075964	1509	3		1
Deletion253	chr5:89896061..89896714	653	3		1
Deletion254	chr6:108137890..108139322	1432	3		1
Deletion255	chr6:111401655..111403245	1590	3		1
Deletion256	chr6:12010786..12012162	1376	3		1
Deletion257	chr6:129031014..129032433	1419	3		1
Deletion258	chr6:134310598..134312210	1612	3		1
Deletion259	chr6:14852738..14853798	1060	3		1
Deletion260	chr6:150125207..150126687	1480	3		1
Deletion261	chr6:154488317..154489361	1044	3		1
Deletion262	chr6:158467804..158469055	1251	3		1
Deletion263	chr6:19263139..19264210	1071	3		1
Deletion264	chr6:23850860..23854203	3343	3		1
Deletion265	chr6:30007323..30009963	2640	3		2
Deletion266	chr6:30315398..30316408	1010	3		1
Deletion267	chr6:35734329..35737725	3396	3		1
Deletion268	chr6:39030036..39030614	578	3		1
Deletion269	chr6:464062..465866	1804	3		1
Deletion270	chr6:5080039..5080797	758	3		1
Deletion271	chr6:55515266..55516738	1472	3		1
Deletion272	chr6:57404691..57409982	5291	3		1
Deletion273	chr6:65241711..65242705	994	3		1
Deletion274	chr6:74477452..74478731	1279	3		1
Deletion275	chr6:7662363..7663525	1162	3		1
Deletion276	chr6:89978349..89978982	633	3		1
Deletion277	chr6:9020042..9021178	1136	3		1
Deletion278	chr6:9568081..9569585	1504	3		1
Deletion279	chr7:103250200..103250764	564	3		1
Deletion280	chr7:103974357..103975018	661	3		1
Deletion281	chr7:113739931..113741127	1196	3		1
Deletion282	chr7:127407194..127407716	522	3		1
Deletion283	chr7:136501221..136502754	1533	3		1
Deletion284	chr7:140760165..140761140	975	3		1
Deletion285	chr7:141726152..141727567	1415	3		1
Deletion286	chr7:146092098..146094492	2394	3		1
Deletion287	chr7:147693321..147694875	1554	3		1
Deletion288	chr7:14876448..14877305	857	3		1
Deletion289	chr7:150093461..150094512	1051	3		1
Deletion290	chr7:25010231..25011494	1263	3		1
Deletion291	chr7:54636460..54637272	812	3		1
Deletion292	chr7:67363875..67364773	898	3		1
Deletion293	chr7:70782772..70784119	1347	3		1
Deletion294	chr7:81566004..81567464	1460	3		1
Deletion295	chr7:90421663..90423077	1414	3		1
Deletion296	chr8:119049114..119050597	1483	3		1
Deletion297	chr8:142306070..142308919	2849	3		1
Deletion298	chr8:2467201..2468474	1273	3		1
Deletion299	chr8:89460971..89461763	792	3		1
Deletion300	chr9:100387136..100388697	1561	3		1
Deletion301	chr9:10393745..10395338	1593	3		1
Deletion302	chr9:128286532..128288082	1550	3		1
Deletion303	chr9:135403732..135404832	1100	3		1
Deletion304	chr9:137609564..137610826	1262	3		2
Deletion305	chr9:16378799..16380488	1689	3		1
Deletion306	chr9:22989122..22990093	971	3		1
Deletion307	chr9:3770221..3770994	773	3		1
Deletion308	chr9:78745580..78748404	2824	3		1
Deletion309	chr9:95510135..95511458	1323	3		1
Deletion310	chr13:29112343..29120181	7838	4	2	1
Deletion311	chr2:216793614..216808852	15238	4	2	1
Deletion312	chr7:118611029..118627840	16811	4	2	1
Deletion313	chr7:49684801..49699878	15077	4	2	1
Deletion314	chr3:6624182..6631995	7813	4	3	1
Deletion315	chr5:26831211..26839642	8431	4	3	1
Deletion316	chr2:110206800..111170044	963244	4	4	1
Deletion317	chr3:194258585..194265956	7371	4	5	1
Deletion318	chr9:70927716..70939838	12122	4	5	1
Deletion319	chr2:14621562..14632032	10470	4	6	1
Deletion320	chr6:54035454..54044974	9520	4	6	1
Deletion321	chr6:24918059..24927690	9631	4	8	1
Deletion322	chr7:141966538..142006483	39945	4	8	1
Deletion323	chr11:101066835..101080537	13702	4	10	1
Deletion324	chr4:18685853..18698044	12191	4	11	1
Deletion325	chr14:65138756..65148638	9882	4	15	1
Deletion326	chr8:32799283..32811894	12611	4	20	1
Deletion327	chr2:176973862..176980863	7001	4	21	1
Deletion328	chr4:115394391..115403529	9138	4	23	1
Deletion329	chr12:38611259..38687227	75968	4	24	1
Deletion330	chr5:59524617..59533206	8589	4	24	1
Deletion331	chr12:74437146..74444938	7792	4	26	1
Deletion332	chr12:97616538..97978111	361573	4	30	1
Deletion333	chr20:53867818..53874107	6289	4	30	1
Deletion334	chr8:112436515..121631999	9195484	4	30	1
Deletion335	chr7:26103468..26112409	8941	4	31	1
Deletion336	chr1:172210814..172211851	1037	4		1
Deletion337	chr1:197705173..197706899	1726	4		1
Deletion338	chr1:205358783..205360012	1229	4		1
Deletion339	chr1:234985500..234986372	872	4		1
Deletion340	chr1:58516473..58518015	1542	4		1
Deletion341	chr10:108020081..108022663	2582	4		1
Deletion342	chr10:1082398..1083713	1315	4		1
Deletion343	chr10:12600269..12603703	3434	4		1
Deletion344	chr10:132729917..132732058	2141	4		1
Deletion345	chr10:134954528..134956703	2175	4		1
Deletion346	chr10:20036523..20038443	1920	4		1
Deletion347	chr10:32297818..32300699	2881	4		1
Deletion348	chr10:43524029..43525831	1802	4		1
Deletion349	chr10:61035197..61036302	1105	4		1
Deletion350	chr10:70256997..70258265	1268	4		1
Deletion351	chr10:819613..820619	1006	4		2
Deletion352	chr10:84227199..84228497	1298	4		1
Deletion353	chr11:103515535..103516268	733	4		1
Deletion354	chr11:97753231..97754128	897	4		1
Deletion355	chr12:118507271..118509490	2219	4		1
Deletion356	chr12:128138040..128140124	2084	4		1
Deletion357	chr12:130483389..130484952	1563	4		1
Deletion358	chr12:131377170..131378501	1331	4		1
Deletion359	chr12:131903552..131904699	1147	4		1
Deletion360	chr12:25560580..25562030	1450	4		1
Deletion361	chr12:39469240..39470130	890	4		1
Deletion362	chr12:45361265..45362174	909	4		1
Deletion363	chr12:82566300..82566883	583	4		1
Deletion364	chr12:94864425..94867108	2683	4		1
Deletion365	chr13:106722017..106723068	1051	4		1
Deletion366	chr13:110502025..110503228	1203	4		1
Deletion367	chr13:112505854..112507158	1304	4		1
Deletion368	chr13:22455374..22456079	705	4		1
Deletion369	chr13:24618825..24619420	595	4		1
Deletion370	chr14:104996324..104997679	1355	4		1
Deletion371	chr14:21844532..21845515	983	4		1
Deletion372	chr14:33583724..33585222	1498	4		1
Deletion373	chr14:47403541..47404344	803	4		1
Deletion374	chr14:58952976..58954082	1106	4		1
Deletion375	chr14:62957128..62957612	484	4		1
Deletion376	chr14:72175633..72177076	1443	4		1
Deletion377	chr14:76067644..76069837	2193	4		1
Deletion378	chr14:80947412..80950633	3221	4		1
Deletion379	chr14:96244483..96245757	1274	4		1
Deletion380	chr15:75697882..75698305	423	4		1
Deletion381	chr15:96717239..96718600	1361	4		1
Deletion382	chr16:175817..177301	1484	4		1
Deletion383	chr16:19137911..19138312	401	4		1
Deletion384	chr16:83058483..83061937	3454	4		1
Deletion385	chr16:84841278..84842368	1090	4		1
Deletion386	chr16:88022934..88024497	1563	4		1
Deletion387	chr17:495631..497319	1688	4		1
Deletion388	chr17:61695355..61697061	1706	4		1
Deletion389	chr17:64471402..64472940	1538	4		1
Deletion390	chr17:64598783..64599635	852	4		1
Deletion391	chr17:980967..982053	1086	4		1
Deletion392	chr18:45220023..45222058	2035	4		1
Deletion393	chr19:373764..374763	999	4		1
Deletion394	chr19:56867350..56869869	2519	4		1
Deletion395	chr19:62166312..62167649	1337	4		1
Deletion396	chr2:106061193..106062914	1721	4		1
Deletion397	chr2:1079429..1081081	1652	4		1
Deletion398	chr2:134176352..134177309	957	4		1
Deletion399	chr2:152324821..152325964	1143	4		1
Deletion400	chr2:1685356..1687478	2122	4		1
Deletion401	chr2:169103506..169104359	853	4		1
Deletion402	chr2:176385946..176387652	1706	4		1
Deletion403	chr2:33077889..33081576	3687	4		1
Deletion404	chr2:44320353..44323001	2648	4		1
Deletion405	chr2:44636708..44638075	1367	4		1
Deletion406	chr2:5126351..5126973	622	4		1
Deletion407	chr2:661126..661880	754	4		1
Deletion408	chr2:77971000..77972215	1215	4		1
Deletion409	chr2:84611436..84612375	939	4		1
Deletion410	chr2:88809839..88813547	3708	4		1
Deletion411	chr20:11465072..11465956	884	4		1
Deletion412	chr20:16188161..16189117	956	4		1
Deletion413	chr20:2751119..2754933	3814	4		1
Deletion414	chr20:53896505..53897072	567	4		2
Deletion415	chr20:60003910..60005389	1479	4		1
Deletion416	chr23:144229680..144232383	2703	4		1
Deletion417	chr23:16337569..16338210	641	4		1
Deletion418	chr23:45472259..45473255	996	4		1
Deletion419	chr23:94937440..94938819	1379	4		1
Deletion420	chr3:100381548..100385651	4103	4		1
Deletion421	chr3:101111137..101112425	1288	4		1
Deletion422	chr3:113950044..113951313	1269	4		1
Deletion423	chr3:124719123..124720260	1137	4		1
Deletion424	chr3:170220860..170221737	877	4		1
Deletion425	chr3:173882992..173884346	1354	4		1
Deletion426	chr3:185816914..185818304	1390	4		1
Deletion427	chr3:195879937..195882420	2483	4		2
Deletion428	chr3:197539938..197541946	2008	4		1
Deletion429	chr3:6568686..6570662	1976	4		1
Deletion430	chr3:67576205..67580304	4099	4		1
Deletion431	chr3:81990021..81990711	690	4		1
Deletion432	chr3:84187628..84190291	2663	4		1
Deletion433	chr4:100240939..100242486	1547	4		1
Deletion434	chr4:110717374..110718660	1286	4		1
Deletion435	chr4:114204679..114206078	1399	4		1
Deletion436	chr4:114354491..114355159	668	4		1
Deletion437	chr4:120236641..120237158	517	4		2
Deletion438	chr4:134359957..134361463	1506	4		1
Deletion439	chr4:139185629..139186752	1123	4		1
Deletion440	chr4:189427111..189428345	1234	4		1
Deletion441	chr4:190342385..190343420	1035	4		1
Deletion442	chr4:57842264..57843297	1033	4		1
Deletion443	chr4:86879659..86880737	1078	4		1
Deletion444	chr5:117409211..117410244	1033	4		1
Deletion445	chr5:119042963..119043937	974	4		1
Deletion446	chr5:122301378..122302866	1488	4		1
Deletion447	chr5:136881678..136884488	2810	4		1
Deletion448	chr5:160521187..160523573	2386	4		1
Deletion449	chr5:42201583..42203528	1945	4		1
Deletion450	chr5:52267186..52268414	1228	4		1
Deletion451	chr5:88066885..88068324	1439	4		1
Deletion452	chr5:95369005..95369688	683	4		1
Deletion453	chr5:99786968..99787721	753	4		1
Deletion454	chr6:162322908..162325064	2156	4		1
Deletion455	chr6:29922937..29924070	1133	4		2
Deletion456	chr6:33690780..33693911	3131	4		1
Deletion457	chr6:54972230..54972872	642	4		1
Deletion458	chr6:5842853..5843960	1107	4		1
Deletion459	chr6:86082949..86083854	905	4		1
Deletion460	chr7:100787505..100790707	3202	4		1
Deletion461	chr7:107251284..107253079	1795	4		1
Deletion462	chr7:116628752..116629772	1020	4		1
Deletion463	chr7:127553508..127554039	531	4		1
Deletion464	chr7:137946962..137948870	1908	4		1
Deletion465	chr7:151876220..151877832	1612	4		1
Deletion466	chr7:152049272..152050801	1529	4		1
Deletion467	chr7:153784683..153786739	2056	4		1
Deletion468	chr7:157216837..157219679	2842	4		1
Deletion469	chr7:157643648..157645227	1579	4		1
Deletion470	chr7:42516191..42516740	549	4		1
Deletion471	chr7:70849449..70850967	1518	4		1
Deletion472	chr8:104451871..104452894	1023	4		1
Deletion473	chr8:108189251..108190040	789	4		1
Deletion474	chr8:115148424..115150368	1944	4		1
Deletion475	chr8:123117035..123118204	1169	4		1
Deletion476	chr8:138812061..138813114	1053	4		1
Deletion477	chr8:144794679..144795216	537	4		1
Deletion478	chr8:144818935..144820437	1502	4		1
Deletion479	chr8:2020739..2021889	1150	4		1
Deletion480	chr8:4531166..4531800	634	4		1
Deletion481	chr8:86418008..86477546	59538	4		1
Deletion482	chr9:130739831..130742238	2407	4		1
Deletion483	chr9:135368700..135370349	1649	4		1
Deletion484	chr9:139893367..139898129	4762	4		1
Deletion485	chr9:33412616..33415140	2524	4		1
Deletion486	chr9:78109250..78112021	2771	4		1
Deletion487	chr9:88988250..88989415	1165	4		1
Deletion488	chr18:50197535..50214378	16843	5	2	1
Deletion489	chr8:42305561..42318006	12445	5	2	1
Deletion490	chr4:172605193..172617290	12097	5	3	1
Deletion491	chr1:185980653..185989821	9168	5	6	1
Deletion492	chr14:34675024..34685312	10288	5	11	1
Deletion493	chr23:154443056..154457211	14155	5	13	1
Deletion494	chr3:117592023..118038191	446168	5	17	2
Deletion495	chr6:79023594..79093529	69935	5	21	1
Deletion496	chr5:151436173..151442769	6596	5	30	1
Deletion497	chr1:114844817..114845484	667	5		1
Deletion498	chr1:11605353..11605887	534	5		1
Deletion499	chr1:151482336..151483417	1081	5		1
Deletion500	chr1:178449834..178450808	974	5		1
Deletion501	chr1:183203562..183204062	500	5		1
Deletion502	chr1:20804275..20805585	1310	5		1
Deletion503	chr1:234121128..234121943	815	5		1
Deletion504	chr1:239216185..239216846	661	5		1
Deletion505	chr1:67780420..67782063	1643	5		1
Deletion506	chr10:114147743..114148449	706	5		1
Deletion507	chr10:115851575..115852887	1312	5		1
Deletion508	chr10:132977676..132978571	895	5		1
Deletion509	chr10:2369319..2369969	650	5		1
Deletion510	chr10:70667821..70668605	784	5		1
Deletion511	chr11:31108494..31109411	917	5		1
Deletion512	chr11:46116520..46119016	2496	5		1
Deletion513	chr12:102817297..102818688	1391	5		1
Deletion514	chr12:121575873..121576641	768	5		1
Deletion515	chr12:29464637..29465473	836	5		1
Deletion516	chr12:39945675..39946543	868	5		1
Deletion517	chr12:47011406..47014722	3316	5		2
Deletion518	chr12:61518523..61519084	561	5		1
Deletion519	chr12:8907490..8909704	2214	5		1
Deletion520	chr12:93767813..93768593	780	5		1
Deletion521	chr12:96078130..96079298	1168	5		1
Deletion522	chr13:28852294..28853237	943	5		1
Deletion523	chr14:24331562..24333130	1568	5		1
Deletion524	chr14:56100543..56101917	1374	5		1
Deletion525	chr15:27198687..27199200	513	5		1
Deletion526	chr15:43855001..43855830	829	5		1
Deletion527	chr15:62419935..62420886	951	5		1
Deletion528	chr15:70172942..70175323	2381	5		1
Deletion529	chr15:81564864..81565540	676	5		1
Deletion530	chr16:69721718..69722549	831	5		1
Deletion531	chr16:83706294..83707898	1604	5		1
Deletion532	chr16:86670165..86673515	3350	5		1
Deletion533	chr17:12136766..12137791	1025	5		1
Deletion534	chr17:17170684..17172081	1397	5		1
Deletion535	chr17:62224914..62226300	1386	5		1
Deletion536	chr18:20157095..20159134	2039	5		1
Deletion537	chr18:33560037..33560684	647	5		1
Deletion538	chr18:41514273..41515430	1157	5		1
Deletion539	chr18:75410585..75413239	2654	5		1
Deletion540	chr19:61509270..61510561	1291	5		1
Deletion541	chr2:101341477..101342256	779	5		1
Deletion542	chr2:121513844..121515137	1293	5		1
Deletion543	chr2:123080854..123081901	1047	5		1
Deletion544	chr2:208182702..208185518	2816	5		1
Deletion545	chr2:240890237..240891471	1234	5		1
Deletion546	chr2:241430555..241431587	1032	5		1
Deletion547	chr2:3696852..3698645	1793	5		1
Deletion548	chr2:76627029..76629097	2068	5		1
Deletion549	chr20:41704940..41708359	3419	5		1
Deletion550	chr21:42576772..42577532	760	5		1
Deletion551	chr21:42880481..42883558	3077	5		1
Deletion552	chr22:25498067..25500134	2067	5		1
Deletion553	chr3:13655712..13657905	2193	5		1
Deletion554	chr3:150751143..150753568	2425	5		1
Deletion555	chr3:162729024..162729830	806	5		1
Deletion556	chr3:164247389..164251780	4391	5		1
Deletion557	chr3:21698488..21701299	2811	5		1
Deletion558	chr3:6405085..6406212	1127	5		1
Deletion559	chr4:190893046..190894613	1567	5		1
Deletion560	chr4:190917637..190920570	2933	5		1
Deletion561	chr4:43625825..43626670	845	5		1
Deletion562	chr4:57781971..57782533	562	5		1
Deletion563	chr5:1113757..1115386	1629	5		1
Deletion564	chr5:1231225..1233881	2656	5		1
Deletion565	chr5:539606..540733	1127	5		1
Deletion566	chr5:60037219..60039611	2392	5		1
Deletion567	chr6:105674502..105675032	530	5		1
Deletion568	chr6:107090123..107090725	602	5		1
Deletion569	chr6:116857463..116858028	565	5		1
Deletion570	chr6:137355308..137356304	996	5		1
Deletion571	chr6:162720565..162721574	1009	5		1
Deletion572	chr6:29793373..29796297	2924	5		1
Deletion573	chr6:66316323..66318943	2620	5		1
Deletion574	chr7:100845692..100847063	1371	5		1
Deletion575	chr7:108140030..108140537	507	5		1
Deletion576	chr7:14217408..14218699	1291	5		1
Deletion577	chr7:157425955..157426959	1004	5		1
Deletion578	chr7:157978512..157979375	863	5		1
Deletion579	chr7:845413..846117	704	5		1
Deletion580	chr8:114125562..114128570	3008	5		1
Deletion581	chr8:29957073..29957907	834	5		1
Deletion582	chr8:99534084..99535031	947	5		1
Deletion583	chr9:109057876..109060732	2856	5		2
Deletion584	chr9:109072933..109075715	2782	5		2
Deletion585	chr9:118516701..118517702	1001	5		1
Deletion586	chr9:139372863..139376279	3416	5		1
Deletion587	chr3:188063146..188076657	13511	6	2	1
Deletion588	chr4:190293339..190301810	8471	6	5	1
Deletion589	chr5:57358798..57369633	10835	6	33	1
Deletion590	chr1:113412798..113416006	3208	6		1
Deletion591	chr1:143737921..143738715	794	6		1
Deletion592	chr1:185031133..185032216	1083	6		1
Deletion593	chr1:222313575..222314911	1336	6		1
Deletion594	chr1:225051892..225052759	867	6		1
Deletion595	chr10:10348083..10349521	1438	6		1
Deletion596	chr10:107940267..107941665	1398	6		1
Deletion597	chr10:127734985..127736046	1061	6		1
Deletion598	chr10:128096189..128097163	974	6		1
Deletion599	chr10:134680391..134682345	1954	6		1
Deletion600	chr10:1358813..1360158	1345	6		1
Deletion601	chr10:6137199..6137915	716	6		1
Deletion602	chr10:7116685..7118770	2085	6		1
Deletion603	chr12:131452212..131452993	781	6		1
Deletion604	chr12:46994708..46997465	2757	6		2
Deletion605	chr12:58808047..58812289	4242	6		1
Deletion606	chr13:41053047..41053497	450	6		1
Deletion607	chr14:20605884..20606777	893	6		1
Deletion608	chr14:21022250..21024600	2350	6		1
Deletion609	chr14:67672226..67673771	1545	6		1
Deletion610	chr15:50312378..50312891	513	6		1
Deletion611	chr15:77678820..77679481	661	6		1
Deletion612	chr15:96523381..96524028	647	6		1
Deletion613	chr15:97391805..97393389	1584	6		1
Deletion614	chr16:25247198..25250722	3524	6		1
Deletion615	chr18:74230431..74234382	3951	6		1
Deletion616	chr2:134682525..134686635	4110	6		1
Deletion617	chr2:134997923..134999449	1526	6		1
Deletion618	chr2:142066899..142068047	1148	6		1
Deletion619	chr2:19630666..19634467	3801	6		1
Deletion620	chr2:240696512..240696993	481	6		1
Deletion621	chr20:11595329..11596945	1616	6		1
Deletion622	chr20:21233638..21236911	3273	6		1
Deletion623	chr20:62113155..62114726	1571	6		1
Deletion624	chr21:38511889..38512768	879	6		1
Deletion625	chr21:38821604..38822723	1119	6		1
Deletion626	chr21:44653680..44655466	1786	6		1
Deletion627	chr3:108520571..108523149	2578	6		1
Deletion628	chr3:121375947..121377280	1333	6		1
Deletion629	chr3:142027026..142029793	2767	6		1
Deletion630	chr3:180032770..180033817	1047	6		1
Deletion631	chr3:7321249..7322378	1129	6		1
Deletion632	chr3:75869789..75870470	681	6		1
Deletion633	chr4:9745065..9745996	931	6		1
Deletion634	chr5:174752206..174753164	958	6		1
Deletion635	chr5:176467760..176468584	824	6		1
Deletion636	chr5:19410759..19412254	1495	6		1
Deletion637	chr6:802100..803235	1135	6		1
Deletion638	chr7:120076716..120079066	2350	6		1
Deletion639	chr7:157739223..157740266	1043	6		1
Deletion640	chr7:81279277..81280497	1220	6		1
Deletion641	chr8:107797525..107798266	741	6		1
Deletion642	chr8:59240941..59241670	729	6		1
Deletion643	chr9:103483719..103484650	931	6		1
Deletion644	chr9:109576815..109580725	3910	6		1
Deletion645	chr9:137353651..137357598	3947	6		1
Deletion646	chr10:114093768..114107422	13654	7	2	1
Deletion647	chr18:49455256..49466156	10900	7	2	1
Deletion648	chr8:96943925..96956300	12375	7	3	1
Deletion649	chr15:75794714..75800050	5336	7	5	1
Deletion650	chr3:133190614..133198700	8086	7	5	1
Deletion651	chr3:22066487..22073212	6725	7	10	1
Deletion652	chr7:109966754..109978883	12129	7	10	1
Deletion653	chr7:113202997..113209741	6744	7	16	1
Deletion654	chr14:39678725..39687584	8859	7	21	1
Deletion655	chr6:57530700..57537312	6612	7	21	1
Deletion656	chr8:51192104..51201103	8999	7	28	1
Deletion657	chr10:117701455..117702602	1147	7		1
Deletion658	chr10:46508122..46508834	712	7		3
Deletion659	chr10:92959011..92959594	583	7		1
Deletion660	chr12:11917639..11919350	1711	7		1
Deletion661	chr13:25947792..25950707	2915	7		1
Deletion662	chr13:46587447..46588198	751	7		1
Deletion663	chr15:77591336..77592469	1133	7		1
Deletion664	chr16:1362436..1364345	1909	7		1
Deletion665	chr17:76076294..76078580	2286	7		1
Deletion666	chr18:22825576..22826433	857	7		1
Deletion667	chr19:56098255..56100316	2061	7		1
Deletion668	chr2:1336892..1337555	663	7		1
Deletion669	chr2:170349058..170352419	3361	7		1
Deletion670	chr2:206439371..206439936	565	7		1
Deletion671	chr2:32994348..32997546	3198	7		1
Deletion672	chr2:78911135..78911625	490	7		1
Deletion673	chr20:61195022..61196455	1433	7		1
Deletion674	chr23:134985636..134986415	779	7		1
Deletion675	chr3:4041794..4044682	2888	7		1
Deletion676	chr4:120233101..120234037	936	7		2
Deletion677	chr4:1495255..1497238	1983	7		1
Deletion678	chr5:10692065..10693309	1244	7		1
Deletion679	chr6:4981795..4984374	2579	7		1
Deletion680	chr7:157834244..157835740	1496	7		1
Deletion681	chr7:2041365..2042794	1429	7		1
Deletion682	chr7:32356666..32359846	3180	7		1
Deletion683	chr9:105607760..105609647	1887	7		1
Deletion684	chr9:88344085..88345822	1737	7		1
Deletion685	chr1:241849254..241850404	1150	8		1
Deletion686	chr10:453555..454398	843	8		1
Deletion687	chr13:45617746..45618487	741	8		1
Deletion688	chr14:102645193..102645875	682	8		1
Deletion689	chr14:104344806..104346062	1256	8		1
Deletion690	chr14:77897962..77898424	462	8		1
Deletion691	chr16:69534701..69537616	2915	8		1
Deletion692	chr16:87140765..87141824	1059	8		1
Deletion693	chr17:44391971..44392909	938	8		1
Deletion694	chr2:109181814..109182925	1111	8		1
Deletion695	chr2:216866402..216867249	847	8		1
Deletion696	chr2:994526..995556	1030	8		1
Deletion697	chr20:61737585..61738695	1110	8		1
Deletion698	chr3:1118729..1119928	1199	8		1
Deletion699	chr3:2286469..2287254	785	8		1
Deletion700	chr5:10627893..10628823	930	8		1
Deletion701	chr5:166335338..166336608	1270	8		1
Deletion702	chr5:177454414..177456827	2413	8		1
Deletion703	chr5:178771446..178772737	1291	8		1
Deletion704	chr5:68759407..68760342	935	8		1
Deletion705	chr5:9464493..9465329	836	8		1
Deletion706	chr6:11663646..11664677	1031	8		1
Deletion707	chr6:54663860..54664913	1053	8		1
Deletion708	chr7:155419311..155420656	1345	8		1
Deletion709	chr7:895688..896682	994	8		1
Deletion710	chr8:113154291..113155034	743	8		1
Deletion711	chr8:98664393..98664958	565	8		1
Deletion712	chr9:137618726..137620363	1637	8		2
Deletion713	chr9:783181..784573	1392	8		1
Deletion714	chr9:83513704..83516762	3058	8		1
Deletion715	chr5:132946257..132953410	7153	9	25	1
Deletion716	chr10:4279985..4281766	1781	9		1
Deletion717	chr10:95535441..95536501	1060	9		1
Deletion718	chr13:112469022..112469857	835	9		1
Deletion719	chr16:79730999..79731944	945	9		1
Deletion720	chr2:195922830..195923864	1034	9		1
Deletion721	chr2:54418421..54421043	2622	9		1
Deletion722	chr6:18509620..18510894	1274	9		1
Deletion723	chr7:198011..199286	1275	9		1
Deletion724	chr7:87928980..87930120	1140	9		1
Deletion725	chr8:97167206..97167725	519	9		1
Deletion726	chr9:135682076..135683495	1419	9		1
Deletion727	chr2:126159528..126168826	9298	10	16	1
Deletion728	chr5:13469560..13476363	6803	10	22	1
Deletion729	chr10:99024732..99027444	2712	10		1
Deletion730	chr14:33744151..33745020	869	10		1
Deletion731	chr20:62066360..62067975	1615	10		1
Deletion732	chr5:155244287..155245175	888	10		1
Deletion733	chr5:2003955..2004549	594	10		2
Deletion734	chr7:118130999..118132021	1022	10		1
Deletion735	chr8:141701429..141702633	1204	10		1
Deletion736	chr13:42437753..42439467	1714	11		1
Deletion737	chr16:83859964..83862041	2077	11		1
Deletion738	chr5:11869605..11870646	1041	11		1
Deletion739	chr5:177754226..177756640	2414	12		1
Deletion740	chr5:1977527..1978325	798	12		1
Deletion741	chr4:108341822..108359693	17871	13	2	1
Deletion742	chr14:21951225..21952140	915	13		1
Deletion743	chr17:53042501..53044982	2481	13		1
Deletion744	chr8:127261333..127263801	2468	13		1
Deletion745	chr20:38924540..38942286	17746	14	5	3
Deletion746	chr15:98868706..98869959	1253	14		1
Deletion747	chr2:76379801..76382566	2765	14		1
Deletion748	chr21:42223152..42226601	3449	14		1
Deletion749	chr8:129534147..129540457	6310	17	55	1
Deletion750	chr1:183081153..183088607	7454	18	18	1
Deletion751	chr1:173335702..173346563	10861		6	1
Deletion752	chr10:77925034..77931549	6515		6	1
Deletion753	chr12:11396104..11438446	42342		6	1
Deletion754	chr15:74669849..74688177	18328		6	1
Deletion755	chr17:34645890..42311443	7665553		6	1
Deletion756	chr2:179767272..179791698	24426		6	1
Deletion757	chr2:48702347..48712719	10372		6	1
Deletion758	chr20:14733424..15200905	467481		6	3
Deletion759	chr20:59009881..59039263	29382		6	1
Deletion760	chr22:40853176..40864590	11414		6	1
Deletion761	chr3:68822297..68832097	9800		6	1
Deletion762	chr4:167913375..167920526	7151		6	1
Deletion763	chr6:86764605..86772908	8303		6	1
Deletion764	chr9:22485621..22499028	13407		6	1
Deletion765	chr20:1506615..1542976	36361		7	1
Deletion766	chr23:29227786..29317113	89327		7	1
Deletion767	chr4:70501955..70508954	6999		7	1
Deletion768	chr6:103842841..103873113	30272		7	1
Deletion769	chr6:77493490..77521661	28171		7	1
Deletion770	chr8:83899869..83912247	12378		7	1
Deletion771	chr1:245911210..245924115	12905		8	1
Deletion772	chr1:246109103..246124580	15477		8	1
Deletion773	chr11:92507924..92517280	9356		8	1
Deletion774	chr12:63906511..109752402	45845891		8	1
Deletion775	chr16:83994963..84004661	9698		8	1
Deletion776	chr2:184501692..184516287	14595		8	1
Deletion777	chr2:190324794..190339192	14398		8	1
Deletion778	chr3:117450756..117478470	27714		8	1
Deletion779	chr3:133471410..133478446	7036		8	1
Deletion780	chr3:164198481..164206849	8368		8	1
Deletion781	chr10:54451556..54459394	7838		9	1
Deletion782	chr10:76858254..76878426	20172		9	1
Deletion783	chr14:30222966..30239990	17024		9	1
Deletion784	chr16:70713670..70804292	90622		9	1
Deletion785	chr17:49206072..49217836	11764		9	1
Deletion786	chr19:17086844..17741607	654763		9	1
Deletion787	chr2:142251147..142370351	119204		9	1
Deletion788	chr21:15334013..15360525	26512		9	1
Deletion789	chr3:117814845..118060734	245889		9	2
Deletion790	chr4:182154912..182822126	667214		9	1
Deletion791	chr6:133383004..133390753	7749		9	1
Deletion792	chr7:100165303..100181750	16447		9	1
Deletion793	chr9:74813682..74844723	31041		9	1
Deletion794	chr2:41090078..41104504	14426		10	1
Deletion795	chr22:25173870..25200883	27013		10	1
Deletion796	chr3:118226504..118338839	112335		10	1
Deletion797	chr5:103878763..103888939	10176		10	1
Deletion798	chr7:142150587..142176068	25481		10	1
Deletion799	chr8:73950136..73959485	9349		10	1
Deletion800	chr19:40540533..40555987	15454		11	1
Deletion801	chr2:141614248..141699364	85116		11	2
Deletion802	chr2:208057688..208069408	11720		11	1
Deletion803	chr2:35827380..35852596	25216		11	1
Deletion804	chr3:118102305..118714147	611842		11	1
Deletion805	chr4:181923114..181978082	54968		11	1
Deletion806	chr7:96313382..96321283	7901		11	1
Deletion807	chr3:118500502..118669447	168945		12	1
Deletion808	chr6:19871944..19880112	8168		12	1
Deletion809	chr9:21809087..21979717	170630		12	2
Deletion810	chr9:9034644..9750011	715367		12	1
Deletion811	chr14:73065997..73095614	29617		13	1
Deletion812	chr22:16150241..16160114	9873		13	1
Deletion813	chr4:188117203..188131504	14301		13	1
Deletion814	chr12:57006904..57017701	10797		14	1
Deletion815	chr15:69443979..69452167	8188		14	1
Deletion816	chr16:76866622..76895488	28866		14	1
Deletion817	chr3:117789868..118368806	578938		14	1
Deletion818	chr3:2537590..2584619	47029		14	1
Deletion819	chr1:216246802..216256239	9437		15	1
Deletion820	chr10:114665875..115289510	623635		15	1
Deletion821	chr14:40678443..40740123	61680		15	1
Deletion822	chr23:56810809..56824457	13648		15	1
Deletion823	chr3:23482201..73955483	50473282		15	1
Deletion824	chr8:1327821..1344507	16686		15	1
Deletion825	chr9:15805028..15813706	8678		15	1
Deletion826	chr12:52272446..52284568	12122		16	1
Deletion827	chr15:54838015..55321745	483730		16	1
Deletion828	chr8:5582902..5594025	11123		16	1
Deletion829	chr17:36674725..36686364	11639		17	1
Deletion830	chr17:68326108..68333222	7114		17	1
Deletion831	chr7:109221828..109241258	19430		17	1
Deletion832	chr1:105816352..105825816	9464		18	1
Deletion833	chr2:146578114..146593973	15859		18	1
Deletion834	chr2:194396988..194410482	13494		18	1
Deletion835	chr3:55588235..55736220	147985		18	1
Deletion836	chr12:44189003..44196265	7262		19	1
Deletion837	chr7:141692927..141720810	27883		19	1
Deletion838	chr1:227879071..227887816	8745		20	1
Deletion839	chr1:151026145..151038173	12028		21	1
Deletion840	chr4:147137283..147147396	10113		21	1
Deletion841	chr6:5123191..5326207	203016		21	1
Deletion842	chr4:10001118..10011349	10231		27	1
Deletion843	chr3:4782271..4836453	54182		28	1
Deletion844	chr16:76931349..77050518	119169		32	1
Deletion845	chr1:150822007..150856892	34885		50	1

## Sheet: Tandem duplication
ID	Location	Span	1kb count	10kb count	Supercluster count
Tandem duplication1	chr16:20808299..20842463	34164	2	2	1
Tandem duplication2	chr16:63705141..63710615	5474	2	2	1
Tandem duplication3	chr3:177635335..177640561	5226	2	3	1
Tandem duplication4	chr14:67371245..67622181	250936	2	4	1
Tandem duplication5	chr17:49095128..49104137	9009	2	4	1
Tandem duplication6	chr19:18760335..18961316	200981	2	4	1
Tandem duplication7	chr8:58279295..58290024	10729	2	4	1
Tandem duplication8	chr4:65405718..65586941	181223	2	6	1
Tandem duplication9	chr6:76446059..76530471	84412	2	6	1
Tandem duplication10	chr3:162225721..162910715	684994	2	7	1
Tandem duplication11	chr1:150214118..150326830	112712	2	8	1
Tandem duplication12	chr14:52678938..52778772	99834	2	9	1
Tandem duplication13	chr17:74368989..74384974	15985	2	9	1
Tandem duplication14	chr4:176208811..176590878	382067	2	9	1
Tandem duplication15	chr9:82612593..84373457	1760864	2	9	3
Tandem duplication16	chr13:33005149..33297981	292832	2	10	1
Tandem duplication17	chr3:109773058..109796431	23373	2	11	1
Tandem duplication18	chr12:54481171..54557981	76810	2	13	1
Tandem duplication19	chr12:54521818..54700885	179067	2	13	1
Tandem duplication20	chr12:2968232..3121979	153747	2	14	1
Tandem duplication21	chr5:72179493..72191807	12314	2	15	1
Tandem duplication22	chr1:116674279..116931850	257571	2	16	2
Tandem duplication23	chr5:6534891..6558334	23443	2	18	1
Tandem duplication24	chr8:144246014..144356267	110253	2	18	1
Tandem duplication25	chr18:41564785..41659356	94571	2	19	1
Tandem duplication26	chr2:237978798..238198056	219258	2	20	1
Tandem duplication27	chr14:101535838..101572572	36734	2	25	1
Tandem duplication28	chr23:10979956..11034835	54879	2	26	1
Tandem duplication29	chr5:59965510..60092879	127369	2	33	1
Tandem duplication30	chr21:35111654..35156947	45293	2	42	1
Tandem duplication31	chr10:9168179..9319196	151017	3	3	1
Tandem duplication32	chr7:32786814..34888125	2101311	3	3	1
Tandem duplication33	chr11:66509797..66604346	94549	3	7	1
Tandem duplication34	chr2:30716872..30812651	95779	3	7	1
Tandem duplication35	chr20:39164223..39214347	50124	3	7	1
Tandem duplication36	chr10:11129576..11215159	85583	3	8	1
Tandem duplication37	chr6:151912788..151944393	31605	3	8	2
Tandem duplication38	chr7:145721954..145743061	21107	3	8	1
Tandem duplication39	chr8:28565575..28624960	59385	3	8	1
Tandem duplication40	chr1:172122846..172131479	8633	3	9	1
Tandem duplication41	chr5:21185046..21207382	22336	3	10	1
Tandem duplication42	chr3:64124001..64202465	78464	3	11	1
Tandem duplication43	chr5:126604053..126816085	212032	3	11	1
Tandem duplication44	chr6:151928626..152086290	157664	3	12	2
Tandem duplication45	chr18:98204..101097	2893	3	13	3
Tandem duplication46	chr2:204658953..204717869	58916	3	13	1
Tandem duplication47	chr10:13572477..13694827	122350	3	14	1
Tandem duplication48	chr3:189559290..189595146	35856	3	18	1
Tandem duplication49	chr17:46960537..47069971	109434	3	19	1
Tandem duplication50	chr17:67593912..67804922	211010	3	21	1
Tandem duplication51	chr12:44861510..44892509	30999	3	22	1
Tandem duplication52	chr10:127181008..127186623	5615	3		1
Tandem duplication53	chr11:1007063..1007691	628	3		1
Tandem duplication54	chr12:88566884..89178923	612039	3		1
Tandem duplication55	chr18:18384063..18384594	531	3		1
Tandem duplication56	chr7:154507593..154510659	3066	3		1
Tandem duplication57	chr10:8452666..8597969	145303	4	6	2
Tandem duplication58	chr13:36597347..36650193	52846	4	11	1
Tandem duplication59	chr11:118400814..118882593	481779	4	15	2
Tandem duplication60	chr14:37101909..37136273	34364	4	26	2
Tandem duplication61	chr15:94153553..94502698	349145	4		1
Tandem duplication62	chr3:159933587..159938077	4490	4		1
Tandem duplication63	chr6:107989887..108054776	64889	5	18	1
Tandem duplication64	chr12:39162404..39165114	2710	5		1
Tandem duplication65	chr18:3202276..3270099	67823	9	32	1
Tandem duplication66	chr1:151939823..151959606	19783		6	1
Tandem duplication67	chr1:161437360..161497806	60446		6	1
Tandem duplication68	chr12:56350451..56585544	235093		6	1
Tandem duplication69	chr16:28003414..28033090	29676		6	1
Tandem duplication70	chr19:10862787..10955458	92671		6	1
Tandem duplication71	chr2:96847486..97013847	166361		6	1
Tandem duplication72	chr22:27554026..27564845	10819		6	2
Tandem duplication73	chr23:6258297..6269529	11232		6	1
Tandem duplication74	chr4:112676493..112782506	106013		6	1
Tandem duplication75	chr4:174910201..174981687	71486		6	1
Tandem duplication76	chr6:151864735..152050145	185410		6	1
Tandem duplication77	chr7:134835272..134906650	71378		6	1
Tandem duplication78	chr7:26191272..26247251	55979		6	1
Tandem duplication79	chr7:2854439..3426747	572308		6	1
Tandem duplication80	chr7:48709775..48756796	47021		6	1
Tandem duplication81	chr7:99251766..99376207	124441		6	1
Tandem duplication82	chr8:99114412..99201654	87242		6	1
Tandem duplication83	chr9:118758591..118772881	14290		6	1
Tandem duplication84	chr1:110032155..110042435	10280		7	1
Tandem duplication85	chr1:61931147..62103021	171874		7	1
Tandem duplication86	chr11:61005456..61021523	16067		7	1
Tandem duplication87	chr14:37103565..37254211	150646		7	2
Tandem duplication88	chr17:58829721..58895617	65896		7	1
Tandem duplication89	chr4:174464275..174491099	26824		7	1
Tandem duplication90	chr6:34906593..34987455	80862		7	1
Tandem duplication91	chr10:52562161..52584762	22601		8	1
Tandem duplication92	chr11:29648152..29668143	19991		8	1
Tandem duplication93	chr11:32080559..32248472	167913		8	1
Tandem duplication94	chr2:127663947..127789570	125623		8	1
Tandem duplication95	chr22:27451243..27545078	93835		8	2
Tandem duplication96	chr3:180276839..180386293	109454		8	1
Tandem duplication97	chr3:184030957..184172734	141777		8	1
Tandem duplication98	chr4:157265149..157314323	49174		8	1
Tandem duplication99	chr5:112341279..112477218	135939		8	1
Tandem duplication100	chr8:68302253..68321427	19174		8	1
Tandem duplication101	chr14:105153778..105185395	31617		9	3
Tandem duplication102	chr16:76714476..76728498	14022		9	1
Tandem duplication103	chr22:20267561..20450048	182487		9	1
Tandem duplication104	chr23:110326195..110347799	21604		9	1
Tandem duplication105	chr6:97545748..97551260	5512		9	1
Tandem duplication106	chr1:16540281..16594154	53873		10	1
Tandem duplication107	chr10:32394447..32616500	222053		10	1
Tandem duplication108	chr17:1439266..1533065	93799		10	1
Tandem duplication109	chr18:31952868..31967770	14902		10	1
Tandem duplication110	chr1:168088532..168212374	123842		11	1
Tandem duplication111	chr1:199746658..199795815	49157		11	1
Tandem duplication112	chr10:50350610..50375269	24659		11	1
Tandem duplication113	chr12:38445328..38530168	84840		11	1
Tandem duplication114	chr21:38402408..38466439	64031		11	1
Tandem duplication115	chr4:152669199..152755396	86197		11	1
Tandem duplication116	chr8:115852268..117799664	1947396		11	1
Tandem duplication117	chr11:116891988..118397724	1505736		12	2
Tandem duplication118	chr12:119111215..119272190	160975		12	1
Tandem duplication119	chr2:113431741..113505593	73852		12	1
Tandem duplication120	chr2:192408330..192436363	28033		12	1
Tandem duplication121	chr23:30653340..30666607	13267		12	1
Tandem duplication122	chr8:2960774..2997515	36741		12	1
Tandem duplication123	chr9:82571442..82891468	320026		12	3
Tandem duplication124	chr1:37673204..37730589	57385		13	1
Tandem duplication125	chr12:6172896..6319755	146859		13	1
Tandem duplication126	chr16:83179908..83373108	193200		13	1
Tandem duplication127	chr17:46654124..46732645	78521		13	1
Tandem duplication128	chr2:205984172..205998730	14558		13	1
Tandem duplication129	chr20:3681684..3814433	132749		13	1
Tandem duplication130	chr11:45778621..86241097	40462476		14	2
Tandem duplication131	chr15:74412890..74452249	39359		14	1
Tandem duplication132	chr4:126011252..126157889	146637		14	1
Tandem duplication133	chr17:39630940..39790757	159817		15	1
Tandem duplication134	chr19:42307286..42319947	12661		15	1
Tandem duplication135	chr8:102528610..102564854	36244		15	2
Tandem duplication136	chr7:80074945..80099689	24744		16	1
Tandem duplication137	chr20:39077171..39138877	61706		17	1
Tandem duplication138	chr7:157941674..158333457	391783		17	1
Tandem duplication139	chr10:56116704..56139508	22804		18	1
Tandem duplication140	chr15:31373220..31404096	30876		18	1
Tandem duplication141	chr21:45081569..45251791	170222		18	1
Tandem duplication142	chr5:142050306..142188051	137745		19	1
Tandem duplication143	chr5:154122188..154390109	267921		19	1
Tandem duplication144	chr9:82634074..82986185	352111		19	3
Tandem duplication145	chr17:52320178..52420673	100495		20	1
Tandem duplication146	chr18:5943801..5962737	18936		20	1
Tandem duplication147	chr8:102531511..102620972	89461		21	2
Tandem duplication148	chr10:8518066..8616790	98724		22	2
Tandem duplication149	chr12:131561162..131628778	67616		22	1
Tandem duplication150	chr2:237158199..237423427	265228		22	1
Tandem duplication151	chr1:178952461..179821119	868658		23	1
Tandem duplication152	chr12:51526954..51762316	235362		24	1
Tandem duplication153	chr20:38950508..40661791	1711283		27	3

## Sheet: Unpaired inverison
ID	Chr	Strand L	Location L	Strand R	Location R	Span	1kb count	10kb count	Supercluster count
Unpaired inversion1	chr2	-	124769411	+	124782198	12787	2	2	1
Unpaired inversion2	chr8	-	86418024	+	86483166	65142	2	2	1
Unpaired inversion3	chr15	-	68421468	+	68442913	21445	2	3	2
Unpaired inversion4	chr8	-	90995720	+	91037464	41744	2	3	2
Unpaired inversion5	chr15	+	48419584	-	48425673	6089	2	5	1
Unpaired inversion6	chr1	-	196631201	+	196636160	4959	2	6	2
Unpaired inversion7	chr11	-	45774898	+	45785716	10818	2	8	2
Unpaired inversion8	chr16	+	21500391	-	22617323	1116932	2	16	1
Unpaired inversion9	chr9	+	82570243	-	83489730	919487	2	16	3
Unpaired inversion10	chr15	-	89473454	+	89476804	3350	3	2	1
Unpaired inversion11	chr1	-	156347393	+	177183712	20836319	3	6	1
Unpaired inversion12	chr1	-	164803094	+	166607911	1804817	3	13	1
Unpaired inversion13	chr17	-	43103144	+	46291692	3188548	3	16	1
Unpaired inversion14	chr15	-	47528076	+	47534700	6624	3	22	1
Unpaired inversion15	chr9	+	1040971	-	1201687	160716	3	34	1
Unpaired inversion16	chr10	+	132524466	-	132525911	1445	3		1
Unpaired inversion17	chr17	-	57099377	+	57100618	1241	3		1
Unpaired inversion18	chr1	+	196009390	-	196024598	15208	4	2	1
Unpaired inversion19	chr3	+	164000051	-	164029742	29691	4	3	2
Unpaired inversion20	chr1	+	156677553	-	176334033	19656480	4	9	1
Unpaired inversion21	chr20	-	42743576	+	42744986	1410	4		1
Unpaired inversion22	chr21	-	26296224	+	26297353	1129	4		1
Unpaired inversion23	chr4	+	163797340	-	163799030	1690	4		1
Unpaired inversion24	chr5	-	31226071	+	31227963	1892	4		1
Unpaired inversion25	chr7	+	100402131	-	100405784	3653	4		1
Unpaired inversion26	chr9	-	106856589	+	106858201	1612	5		1
Unpaired inversion27	chr15	+	52340129	-	52345289	5160	6	10	1
Unpaired inversion28	chr12	+	52653226	-	84789451	32136225		6	1
Unpaired inversion29	chr8	+	91019818	-	91042531	22713		6	2
Unpaired inversion30	chr11	+	48341981	-	49993956	1651975		7	2
Unpaired inversion31	chr12	-	32936265	+	32951497	15232		7	1
Unpaired inversion32	chr12	+	33162310	-	44020122	10857812		7	2
Unpaired inversion33	chr23	-	103061852	+	103148094	86242		7	1
Unpaired inversion34	chr23	+	30746234	-	143511756	112765522		7	1
Unpaired inversion35	chr9	-	1140618	+	1141351	733		7	1
Unpaired inversion36	chr12	-	47941454	+	58379292	10437838		8	2
Unpaired inversion37	chr20	-	46040119	+	46407103	366984		8	1
Unpaired inversion38	chr9	-	82896012	+	83491469	595457		8	3
Unpaired inversion39	chr19	-	3919733	+	9909344	5989611		9	1
Unpaired inversion40	chr5	-	21560344	+	29461380	7901036		9	1
Unpaired inversion41	chr1	-	114836385	+	114847807	11422		10	1
Unpaired inversion42	chr20	+	60176170	-	60219579	43409		10	3
Unpaired inversion43	chr22	+	33383827	-	33390722	6895		10	1
Unpaired inversion44	chr1	+	146195653	-	146819336	623683		11	1
Unpaired inversion45	chr17	-	8794733	+	8801470	6737		12	1
Unpaired inversion46	chr8	-	128199226	+	128204443	5217		14	1
Unpaired inversion47	chr8	+	127878416	-	129972542	2094126		15	3
Unpaired inversion48	chr8	-	86478538	+	86483066	4528		16	1
Unpaired inversion49	chr8	+	127876622	-	132911155	5034533		19	3
Unpaired inversion50	chr20	-	49619832	+	60210593	10590761		24	3

## Sheet: Isolated translocation
ID	Chr L	Strand L	location L	Chr R	Strand R	Location R	1kb count	10kb count	Supercluster count
Isolated translocation1	chr7	+	9271173	chr21	-	43147310	2	7	1
Isolated translocation2	chr8	-	143299026	chr17	-	8938203	2	9	1
Isolated translocation3	chr1	+	117396071	chr9	+	93873719	2	13	1
Isolated translocation4	chr17	-	78507396	chr20	+	47925498	2	31	1
Isolated translocation5	chr6	+	13299048	chr17	+	62079413	3	3	1
Isolated translocation6	chr15	+	68468998	chr17	+	54220856	3	7	2
Isolated translocation7	chr17	+	58091736	chr20	-	59537473	3	35	1
Isolated translocation8	chr1	-	54190986	chr2	-	176931741	3		2
Isolated translocation9	chr1	-	120189254	chr20	-	40740815	3		1
Isolated translocation10	chr10	-	74437604	chr17	+	29698845	3		1
Isolated translocation11	chr17	-	25078396	chr19	+	42723097	3		1
Isolated translocation12	chr2	-	41905630	chr4	-	66096308	3		1
Isolated translocation13	chr5	+	115476017	chr7	+	111019467	3		1
Isolated translocation14	chr7	-	110840540	chr12	-	106726414	3		2
Isolated translocation15	chr7	+	110840582	chr12	+	106732917	4	2	0
Isolated translocation16	chr8	-	124673213	chr19	+	62114629	4	5	1
Isolated translocation17	chr5	+	21608833	chr6	-	57682848	4	7	1
Isolated translocation18	chr17	-	70787927	chr20	-	50053608	4	20	1
Isolated translocation19	chr1	+	115166378	chr20	+	40510129	4	33	1
Isolated translocation20	chr1	-	54192734	chr14	-	54477978	4		2
Isolated translocation21	chr1	-	112167056	chr17	+	54395176	5	224	1
Isolated translocation22	chr1	-	114029175	chr11	+	59206482	6	20	1
Isolated translocation23	chr1	-	88746065	chr17	+	29088093	6		1
Isolated translocation24	chr1	-	120062299	chr20	+	38924485	9	65	3
Isolated translocation25	chr3	-	61580295	chr17	+	53991555	32	281	1
Isolated translocation26	chr1	-	106537110	chr3	-	63908719	34	236	1
Isolated translocation27	chr1	-	87714212	chr16	+	69405962		6	1
Isolated translocation28	chr1	+	143255068	chr2	+	5689715		6	2
Isolated translocation29	chr8	+	42897207	chr12	-	33989568		6	2
Isolated translocation30	chr8	-	43564962	chr15	+	60813899		6	1
Isolated translocation31	chr1	+	155935788	chr5	+	168831445		7	1
Isolated translocation32	chr10	-	133704332	chr17	-	19770651		7	3
Isolated translocation33	chr3	+	47841214	chr4	+	101524598		7	1
Isolated translocation34	chr11	+	56031345	chr19	-	4349780		8	1
Isolated translocation35	chr3	-	47753668	chr4	-	101736586		8	1
Isolated translocation36	chr4	+	58163	chr20	-	30286243		8	1
Isolated translocation37	chr2	-	241203459	chr22	+	33049052		9	2
Isolated translocation38	chr3	+	30244179	chr11	+	11905710		9	1
Isolated translocation39	chr6	+	325685	chr16	-	33335657		10	1
Isolated translocation40	chr4	+	181721518	chr19	-	222304		11	1
Isolated translocation41	chr8	+	126164274	chr23	+	148943197		11	1
Isolated translocation42	chr10	+	133716819	chr17	+	19763532		12	3
Isolated translocation43	chr11	+	43612523	chr20	+	55472092		12	1
Isolated translocation44	chr2	+	142186164	chr12	+	100484014		12	1
Isolated translocation45	chr1	+	107472521	chr3	+	62400499		15	1
Isolated translocation46	chr17	+	45201685	chr20	+	57617442		15	1
Isolated translocation47	chr8	-	134270785	chr9	-	129505199		15	1
Isolated translocation48	chr1	-	117280153	chr9	-	93989920		19	1
Isolated translocation49	chr1	+	115440087	chr20	-	40741523		39	1

## Sheet: Inversion
ID	Inversion Segment	Span	1kb count 1	1kb count 2	10kb count 1	10kb count 2	Supercluster count
Inversion1	chr20:46277776..46648097	372758	2	7	3	2	2
Inversion2	chr7:106846340..106850027	5417	3	2	12	11	2
Inversion3	chr10:46443223..46479475	36587	3	9	48	55	2
Inversion4	chr4:190823500..190850107	27499	15	2	86	63	2
Inversion5	chr1:146226657..146235891	22884			8	6	2
Inversion6	chr12:17819017..17899485	94735			9	19	2
Inversion7	chr12:79372824..79381889	21498			10	22	2
Inversion8	chr14:60142583..60147639	8824			10	10	2
Inversion9	chr1:2475153..2488709	16537			11	12	2
Inversion10	chr11:301887..311063	16214			11	8	2
Inversion11	chr7:70064129..70076653	20042			14	18	2
Inversion12	chr2:234136432..234151003	22864			18	11	2
Inversion13	chr2:45146531..45156126	23073			19	7	2
Inversion14	chr23:149322390..149335731	21461			26	34	2
Inversion15	chr21:40322737..40326922	16654			27	20	2
Inversion16	chr12:85766213..85775902	16672			30	14	2
Inversion17	chr16:73797617..73814103	19630			41	39	2
Inversion18	chr12:12436289..12437674	5523			7	9	2
Inversion19	chr23:48900536..48906224	6662			7	15	2
Inversion20	chr4:89066247..89075899	17616			7	16	2
Inversion21	chr12:130665341..130684212	21139			11	23	2
Inversion22	chr2:138721685..138724860	5877			9	6	2
Inversion23	chr23:46695808..46715433	20881			14	11	2

## Sheet: Insertion
ID	Description	Parental Segment	Insertion Segment	Insertion Span	1kb count 1	1kb count 2	10kb count 1	10kb count 2	Supercluster count1	Supercluster count2
Insertion9	Same Chrom, inverse insertion	chr20:46274717..46280801	chr20:46645810..46648126	2316	2	7	3	2	2	2
Insertion4	Diff Chrom, inverse insertion	chr8:128602961..128603357	chr3:112756869..112757725	856	4	3	7	4	2	2
Insertion10	Same Chrom, inverse insertion	chr23:26709407..26710177	chr23:26721306..26731036	9730			9	15	2	2
Insertion1	Diff Chrom, direct insertion	chr17:19592873..19596691	chr11:67128479..67164258	35779			14	7	2	2
Insertion5	Same Chrom, inverse insertion	chr11:1917385..1917786	chr11:1871924..1892424	20500			19	15	3	3
Insertion8	Same Chrom, inverse insertion	chr17:58520429..58524366	chr17:58528619..58532672	4053			21	10	2	2

## Sheet: Intra-chr complex
ID	Chr	Location L	Strand L	Location R	Strand R	Span	1kb count	10kb count	Supercluster count
Intra-chr complex1	chr20	45957526	+	46566342	-	608816	2	4	279
Intra-chr complex2	chr4	67947238	+	67948364	+	1126	2	5	7
Intra-chr complex3	chr7	69167003	+	69180993	-	13990	2	5	4
Intra-chr complex4	chr1	113837526	+	113848580	+	11054	2	7	279
Intra-chr complex5	chr20	41658310	+	47399379	+	5741069	2	9	279
Intra-chr complex6	chr20	51652904	-	51714089	+	61185	2	9	279
Intra-chr complex7	chr20	48783561	+	52419460	+	3635899	2	12	279
Intra-chr complex8	chr1	107549588	+	114284861	-	6735273	2	13	279
Intra-chr complex9	chr20	41630299	+	48065778	+	6435479	2	13	279
Intra-chr complex10	chr20	51882085	+	56794523	-	4912438	2	24	279
Intra-chr complex11	chr1	107404375	+	112210955	+	4806580	2	25	279
Intra-chr complex12	chr20	40282743	+	47358803	+	7076060	2	31	279
Intra-chr complex13	chr20	46146684	+	46217218	-	70534	2	73	279
Intra-chr complex14	chr20	40451703	+	52251104	-	11799401	2	100	279
Intra-chr complex15	chr2	161843542	+	161847196	+	3654	3	2	29
Intra-chr complex16	chr20	45989384	+	50082238	+	4092854	3	4	279
Intra-chr complex17	chr7	68949492	+	69200268	+	250776	3	12	4
Intra-chr complex18	chr20	47401979	-	50119238	+	2717259	3	16	279
Intra-chr complex19	chr17	21152873	+	21164281	+	11408	3	18	279
Intra-chr complex20	chr20	45531950	+	46723580	+	1191630	3	18	279
Intra-chr complex21	chr3	61763948	+	63687607	+	1923659	3	19	279
Intra-chr complex22	chr16	33861296	+	33864945	+	3649	3		50
Intra-chr complex23	chr17	62950705	+	62951660	+	955	3		107
Intra-chr complex24	chr2	132744935	+	132746144	+	1209	3		50
Intra-chr complex25	chr20	60066027	+	60067509	+	1482	3		107
Intra-chr complex26	chr20	61770749	+	61772333	+	1584	3		107
Intra-chr complex27	chr20	45956928	+	45958117	+	1189	3		107
Intra-chr complex28	chr3	150675	+	152492	+	1817	3		50
Intra-chr complex29	chr11	62380664	+	62388995	+	8331	4	8	8
Intra-chr complex30	chr20	40285928	+	40306654	+	20726	4	12	279
Intra-chr complex31	chr20	48855425	+	58279106	-	9423681	4	19	279
Intra-chr complex32	chr1	114147202	-	114190528	+	43326	4	25	279
Intra-chr complex33	chr3	62831789	+	63202724	-	370935	4	40	279
Intra-chr complex34	chr3	62819200	+	63488466	+	669266	4	41	279
Intra-chr complex35	chr20	55169388	+	55271816	+	102428	4	44	279
Intra-chr complex36	chr20	40282185	+	40301891	-	19706	4	48	279
Intra-chr complex37	chr12	126226336	+	126227284	+	948	4		50
Intra-chr complex38	chr20	46564945	+	46566136	+	1191	4		107
Intra-chr complex39	chr4	190809607	+	190810950	+	1343	4		4
Intra-chr complex40	chr20	45956917	-	46564873	+	607956	5	2	279
Intra-chr complex41	chr9	139521624	+	139571117	+	49493	5	12	279
Intra-chr complex42	chr1	114109487	+	114577139	-	467652	5	22	279
Intra-chr complex43	chr17	64848883	+	71329029	-	6480146	5	42	279
Intra-chr complex44	chr1	114147248	+	114177316	-	30068	5	46	279
Intra-chr complex45	chr20	46136879	+	46167623	+	30744	5	76	279
Intra-chr complex46	chr1	177873819	+	177874768	+	949	5		107
Intra-chr complex47	chr1	107171373	+	107330820	+	159447	5		107
Intra-chr complex48	chr9	67912065	+	67913687	+	1622	5		50
Intra-chr complex49	chr2	9876631	+	9877381	+	750	6		107
Intra-chr complex50	chr2	132743270	+	132747065	+	3795	6		50
Intra-chr complex51	chr4	190861324	+	190862168	+	844	6		4
Intra-chr complex52	chr20	51859922	+	51922314	-	62392	7	32	279
Intra-chr complex53	chr2	132733827	+	132735524	+	1697	7		50
Intra-chr complex54	chr20	46093121	-	51970026	+	5876905	9	46	279
Intra-chr complex55	chr3	63006914	-	63471583	+	464669	11	79	279
Intra-chr complex56	chr20	46920435	+	46922134	+	1699	11		107
Intra-chr complex57	chr4	190844293	+	190847450	+	3157	11		4
Intra-chr complex58	chr1	107222780	+	108449983	+	1227203	12	2	279
Intra-chr complex59	chr20	45835080	+	45849435	-	14355	12	11	279
Intra-chr complex60	chr8	126664103	+	126670457	+	6354	15	52	279
Intra-chr complex61	chr1	143802979	+	143812953	+	9974	17	5	4
Intra-chr complex62	chr17	54554479	+	55261733	+	707254	28	192	279
Intra-chr complex63	chr20	40249083	-	55251653	+	15002570	29	148	279
Intra-chr complex64	chr20	45220928	+	61759480	+	16538552	33	2	279
Intra-chr complex65	chr20	45204767	+	53594259	+	8389492	36	3	279
Intra-chr complex66	chr17	57563425	+	57569922	-	6497	37	113	279
Intra-chr complex67	chr20	45204349	-	53590907	+	8386558	42		107
Intra-chr complex68	chr20	53590205	+	53594684	-	4479	44	156	279
Intra-chr complex69	chr20	45205010	+	45211926	+	6916	50		107
Intra-chr complex70	chr20	45811931	+	46974013	-	1162082	60	324	279
Intra-chr complex71	chr3	63716645	+	63952946	+	236301	62	568	279
Intra-chr complex72	chr17	57449496	+	57545070	+	95574	63	2	279
Intra-chr complex73	chr20	51615197	+	55288179	+	3672982	68	766	279
Intra-chr complex74	chr25	5	+	16535	+	16530	406	434	279
Intra-chr complex75	chr1	120430686	+	143790535	-	23359849		6	4
Intra-chr complex76	chr17	38737844	+	38755761	+	17917		6	8
Intra-chr complex77	chr17	57563462	+	58394508	+	831046		6	279
Intra-chr complex78	chr17	56999585	+	57078201	+	78616		6	279
Intra-chr complex79	chr17	57545526	+	58433612	-	888086		6	279
Intra-chr complex80	chr3	178324133	-	178333118	+	8985		6	279
Intra-chr complex81	chr1	113790036	+	113827943	+	37907		7	279
Intra-chr complex82	chr14	105857902	+	105891503	+	33601		7	4
Intra-chr complex83	chr17	54451542	+	55832448	+	1380906		7	279
Intra-chr complex84	chr17	57433300	+	58433574	+	1000274		7	279
Intra-chr complex85	chr20	45221347	+	53592830	+	8371483		7	279
Intra-chr complex86	chr20	45203796	+	48706998	+	3503202		7	279
Intra-chr complex87	chr20	45614110	+	52777243	+	7163133		7	279
Intra-chr complex88	chr9	679666	+	3032454	+	2352788		7	4
Intra-chr complex89	chr20	46003783	-	49685534	+	3681751		8	279
Intra-chr complex90	chr21	10117771	+	10136452	+	18681		8	5
Intra-chr complex91	chr3	62922300	+	63465934	+	543634		8	279
Intra-chr complex92	chr7	69209807	+	69365642	+	155835		8	4
Intra-chr complex93	chr9	3022739	+	3038452	+	15713		8	4
Intra-chr complex94	chr1	114106732	-	115029122	+	922390		9	279
Intra-chr complex95	chr17	38755657	+	38756672	+	1015		9	8
Intra-chr complex96	chr17	21194077	+	21293994	-	99917		9	279
Intra-chr complex97	chr20	46927264	-	52324720	+	5397456		9	279
Intra-chr complex98	chr20	53544098	+	59173747	-	5629649		9	279
Intra-chr complex99	chr20	52888410	+	53041986	+	153576		10	279
Intra-chr complex100	chr9	3043152	+	30326178	-	27283026		10	4
Intra-chr complex101	chr17	57450548	+	58393007	+	942459		11	279
Intra-chr complex102	chr17	57195771	+	57280460	+	84689		11	279
Intra-chr complex103	chr17	38756469	+	38822101	-	65632		11	8
Intra-chr complex104	chr20	45203549		61766792		16563243		11	279
Intra-chr complex105	chr3	62613861	+	64659389	+	2045528		11	279
Intra-chr complex106	chr3	63704025	+	63958503	+	254478		11	279
Intra-chr complex107	chr17	38737378	+	38756587	+	19209		12	8
Intra-chr complex108	chr17	57340972	+	57356649	-	15677		12	279
Intra-chr complex109	chr20	49179411	-	51463729	+	2284318		13	279
Intra-chr complex110	chr1	109428560	+	113784815	+	4356255		14	279
Intra-chr complex111	chr20	50118347	+	51482839	+	1364492		14	279
Intra-chr complex112	chr20	45897691	+	45958159	-	60468		14	279
Intra-chr complex113	chr20	47350707	-	50113686	+	2762979		15	279
Intra-chr complex114	chr20	46174789	-	55262033	+	9087244		17	279
Intra-chr complex115	chr20	45625306	+	45810233	-	184927		17	279
Intra-chr complex116	chr20	50179587	+	51479464	-	1299877		17	279
Intra-chr complex117	chr20	45830921	+	51633545	+	5802624		19	279
Intra-chr complex118	chr20	48706996	+	53592718	+	4885722		21	279
Intra-chr complex119	chr17	57434769	-	57449286	+	14517		23	279
Intra-chr complex120	chr20	51880332	+	52495249	+	614917		24	279
Intra-chr complex121	chr1	107182431	+	107343251	+	160820		25	279
Intra-chr complex122	chr1	143607463	+	143618342	+	10879		26	7
Intra-chr complex123	chr1	114580631	+	115025274	+	444643		32	279
Intra-chr complex124	chr17	57450546	+	57570646	-	120100		32	279
Intra-chr complex125	chr17	58393450	-	58432781	+	39331		33	279
Intra-chr complex126	chr20	40267202	+	52300747	+	12033545		35	279
Intra-chr complex127	chr20	45218905	-	55108948	+	9890043		37	279
Intra-chr complex128	chr1	107929140	-	114152222	+	6223082		39	279
Intra-chr complex129	chr20	48706741	-	55109130	+	6402389		43	279
Intra-chr complex130	chr17	57450331	+	57562596	+	112265		46	279
Intra-chr complex131	chr20	55109160	+	61767430	+	6658270		46	279
Intra-chr complex132	chr20	46184558	+	52112946	+	5928388		55	279
Intra-chr complex133	chr17	57433333	-	57543076	+	109743		100	279
Intra-chr complex134	chr17	57545688	+	58392949	+	847261		101	279
Intra-chr complex135	chr20	45203540	+	45221598	+	18058		108	279
Intra-chr complex136	chr17	57340900	+	57437040	-	96140		195	279
Intra-chr complex137	chr20	53591311	+	61767114	+	8175803		6	279
Intra-chr complex138	chr17	77169261	+	77632916	-	463655		7	279
Intra-chr complex139	chr20	46002895	+	51922424	-	5919529		7	279
Intra-chr complex140	chr1	107175605	+	107330916	+	155311		9	279
Intra-chr complex141	chr20	45896211	-	45956894	+	60683		10	279
Intra-chr complex142	chr20	53592782	-	61766716	+	8173934		19	279
Intra-chr complex143	chr20	45221429	+	53591399	-	8369970		80	279
Intra-chr complex144	chr20	45229961	-	48720143	+	3490182		618	279

## Sheet: Inter-chr complex
ID	Chr L	Strand L	Location L	Chr R	Strand R	Location R	1kb count	10kb count	Supercluster count
Inter-chr complex1	chr1	+	114145104	3	+	64669302	2	2	279
Inter-chr complex2	chr17	+	56854792	20	+	51695382	2	2	279
Inter-chr complex3	chr3	-	61768935	20	-	52766432	2	2	279
Inter-chr complex4	chr2	+	132747136	19	+	23975534	2	3	29
Inter-chr complex5	chr9	-	119189329	15	-	27780149	2	3	4
Inter-chr complex6	chr17	-	42571132	2	+	132733470	2	4	29
Inter-chr complex7	chr17	-	58251778	20	-	61970357	2	4	279
Inter-chr complex8	chr17	+	42569528	2	-	132739685	2	5	29
Inter-chr complex9	chr3	+	178326589	6	-	153563357	2	6	279
Inter-chr complex10	chr8	-	76620006	9	+	673395	2	6	4
Inter-chr complex11	chr17	+	43959824	20	-	57489317	2	7	4
Inter-chr complex12	chr3	-	64857616	20	-	45531918	2	7	279
Inter-chr complex13	chr3	-	64004770	17	+	54037513	2	8	279
Inter-chr complex14	chr1	-	114253101	3	-	62691435	2	10	279
Inter-chr complex15	chr1	+	5658650	16	+	33831371	2	10	29
Inter-chr complex16	chr1	-	108451208	17	+	56009131	2	10	279
Inter-chr complex17	chr17	+	57247373	1	-	107171985	2	11	279
Inter-chr complex18	chr1	-	107433666	17	+	56864821	2	12	279
Inter-chr complex19	chr1	+	165354776	20	+	6610622	2	12	279
Inter-chr complex20	chr17	-	57244128	1	+	107170050	2	12	279
Inter-chr complex21	chr17	+	56665896	20	-	45282581	2	12	279
Inter-chr complex22	chr17	-	56961559	20	+	45726960	2	13	279
Inter-chr complex23	chr17	-	64817595	20	-	56280918	2	14	279
Inter-chr complex24	chr16	-	33857678	2	+	132729239	2	15	50
Inter-chr complex25	chr1	+	114135971	20	+	47348659	2	16	279
Inter-chr complex26	chr1	-	150013028	3	-	64293802	2	20	279
Inter-chr complex27	chr17	+	57283530	20	+	60068343	2	22	279
Inter-chr complex28	chr1	+	107493245	20	-	55261317	3	2	279
Inter-chr complex29	chr9	+	119174285	15	+	27779796	3	3	4
Inter-chr complex30	chr1	+	115009994	20	-	51902293	3	9	279
Inter-chr complex31	chr16	+	33871232	2	-	132751210	3	11	50
Inter-chr complex32	chr17	-	57223935	20	+	51623533	3	11	279
Inter-chr complex33	chr1	+	114611939	16	+	65727152	3	12	279
Inter-chr complex34	chr17	+	55781862	20	+	45341013	3	17	279
Inter-chr complex35	chr9	-	77338661	20	+	50094179	3	19	279
Inter-chr complex36	chr1	+	115034493	3	+	63587766	3	37	279
Inter-chr complex37	chr1	-	113797102	3	-	64478178	3		107
Inter-chr complex38	chr11	+	83305458	23	-	136348145	3		50
Inter-chr complex39	chr16	-	46096230	17	+	30502274	3		50
Inter-chr complex40	chr16	+	33872980	17	-	30502373	3		50
Inter-chr complex41	chr17	-	28173545	23	-	108184419	3		50
Inter-chr complex42	chr2	-	132746162	4	-	10568123	3		50
Inter-chr complex43	chr2	-	229753741	8	-	70765019	3		50
Inter-chr complex44	chr2	-	132736572	17	+	42613976	3		50
Inter-chr complex45	chr4	+	77026236	6	+	119600273	3		50
Inter-chr complex46	chr6	-	119600354	21	+	14379248	3		50
Inter-chr complex47	chr8	+	69381038	11	-	84872795	3		50
Inter-chr complex48	chr10	-	127573088	13	-	19268673	4	2	29
Inter-chr complex49	chr2	+	132747295	16	-	33860255	4	11	50
Inter-chr complex50	chr1	+	150708838	20	-	51946403	4	14	279
Inter-chr complex51	chr1	-	107436519	20	+	45233245	4	16	279
Inter-chr complex52	chr1	-	114089265	20	-	41656642	4	17	279
Inter-chr complex53	chr1	+	116740935	20	-	50113486	4	62	279
Inter-chr complex54	chr1	+	91625687	2	+	132754610	4		50
Inter-chr complex55	chr2	+	132751038	6	-	119600336	4		50
Inter-chr complex56	chr5	+	71182696	23	+	108184384	4		50
Inter-chr complex57	chr20	-	46136873	1	+	106974303	5	26	279
Inter-chr complex58	chr1	-	114130536	20	+	51484699	5	35	279
Inter-chr complex59	chr20	+	46147787	1	-	116598911	5	85	279
Inter-chr complex60	chr19	-	23975543	23	+	108184068	5		50
Inter-chr complex61	chr2	+	132733466	17	-	42590612	5		50
Inter-chr complex62	chr2	-	115411592	19	+	40758543	5		50
Inter-chr complex63	chr1	+	108450959	20	+	45480646	6	5	279
Inter-chr complex64	chr2	-	132749522	16	+	33857672	6	15	50
Inter-chr complex65	chr3	+	64076658	20	+	45845143	6	81	279
Inter-chr complex66	chr1	+	114136086	20	-	50118032	6		107
Inter-chr complex67	chr11	+	84872845	19	+	40758541	6		50
Inter-chr complex68	chr2	-	132728421	16	+	33871833	6		50
Inter-chr complex69	chr3	-	178323918	20	-	51693420	6		107
Inter-chr complex70	chr8	+	70765169	19	+	23975948	7		50
Inter-chr complex71	chr3	+	62824649	20	+	51897709	8	5	279
Inter-chr complex72	chr3	-	63998040	20	-	52304837	8	40	279
Inter-chr complex73	chr3	-	63938740	17	-	54163493	8	77	279
Inter-chr complex74	chr1	+	154453179	16	+	33868776	8		50
Inter-chr complex75	chr4	-	190437919	9	-	67910668	9	7	29
Inter-chr complex76	chr17	-	54058364	20	+	40436725	9	68	279
Inter-chr complex77	chr1	+	154452996	2	-	132731737	9		50
Inter-chr complex78	chr6	-	119600291	12	+	34263898	9		50
Inter-chr complex79	chr1	-	212879828	20	+	55117994	10	55	279
Inter-chr complex80	chr3	+	63996281	20	-	52046887	10	172	279
Inter-chr complex81	chr11	+	84872867	19	-	23976663	10		50
Inter-chr complex82	chr2	-	132736828	13	-	26931765	11	4	29
Inter-chr complex83	chr3	-	64519898	20	-	46127857	11	65	279
Inter-chr complex84	chr17	-	56176667	20	-	52065448	14	97	279
Inter-chr complex85	chr1	-	106875395	20	-	45568427	17	43	279
Inter-chr complex86	chr1	+	107732117	17	-	56206332	17	63	279
Inter-chr complex87	chr3	+	64927282	17	-	59778199	18	245	279
Inter-chr complex88	chr17	-	57433211	20	-	45205329	19		107
Inter-chr complex89	chr17	-	57356459	20	-	45204252	23		107
Inter-chr complex90	chr17	-	59742213	20	-	52990799	24	247	279
Inter-chr complex91	chr17	-	56646074	20	+	58278865	28	39	279
Inter-chr complex92	chr17	-	57563057	20	+	48706727	28		107
Inter-chr complex93	chr17	-	58432935	20	-	48707005	32		107
Inter-chr complex94	chr3	-	63679174	17	-	56234177	35	190	279
Inter-chr complex95	chr17	-	58433199	20	+	61767023	36		107
Inter-chr complex96	chr17	-	57562616	20	-	61767424	39		107
Inter-chr complex97	chr20	+	57449320	17	-	57449320	42	3	279
Inter-chr complex98	chr17	+	57545058	20	-	61759827	60		107
Inter-chr complex99	chr17	+	57341119	20	+	53585407	70	223	279
Inter-chr complex100	chr17	+	58397021	20	+	55109307	72	321	279
Inter-chr complex101	chr17	+	58433647	20	+	45219490	74		107
Inter-chr complex102	chr17	-	56642486	20	-	48863923	77	496	279
Inter-chr complex103	chr20	-	53590318	17	+	57437026	91	19	279
Inter-chr complex104	chr17	+	42571184	20	-	26138018		6	29
Inter-chr complex105	chr1	-	114106402	3	+	63587598		7	279
Inter-chr complex106	chr1	+	107929429	17	+	56103555		7	279
Inter-chr complex107	chr1	+	91625668	20	+	26137013		7	29
Inter-chr complex108	chr17	-	54478496	20	-	52103040		7	279
Inter-chr complex109	chr17	-	56977738	20	-	51641567		7	279
Inter-chr complex110	chr6	-	119600280	16	-	33871126		7	29
Inter-chr complex111	chr17	+	43962212	20	+	54941369		8	4
Inter-chr complex112	chr17	+	57450575	20	-	45221315		8	279
Inter-chr complex113	chr17	+	56687731	20	+	59152129		8	279
Inter-chr complex114	chr1	-	114255774	20	+	52828233		10	279
Inter-chr complex115	chr1	-	114961901	20	+	51788236		10	279
Inter-chr complex116	chr20	-	51935965	21	+	38304191		11	279
Inter-chr complex117	chr1	-	107545854	20	+	51787910		12	279
Inter-chr complex118	chr1	-	107915929	20	+	49183370		12	279
Inter-chr complex119	chr17	-	57543197	20	+	45203536		12	279
Inter-chr complex120	chr17	+	58433528	20	+	53592688		12	279
Inter-chr complex121	chr1	-	115037260	20	+	46933320		13	279
Inter-chr complex122	chr3	+	62035205	7	+	31618055		13	4
Inter-chr complex123	chr1	-	113849970	20	+	46088257		14	279
Inter-chr complex124	chr1	-	114559234	3	-	63203232		15	279
Inter-chr complex125	chr17	+	57234050	20	-	55131782		15	279
Inter-chr complex126	chr3	+	64661902	17	+	57144778		15	279
Inter-chr complex127	chr1	+	106604029	17	-	56186572		16	279
Inter-chr complex128	chr17	-	44245481	20	-	57205589		16	4
Inter-chr complex129	chr3	+	62933081	20	-	52435378		16	279
Inter-chr complex130	chr3	+	63470110	20	-	51896734		16	279
Inter-chr complex131	chr17	-	54516423	20	-	52512674		17	279
Inter-chr complex132	chr17	-	56830744	20	+	48161566		17	279
Inter-chr complex133	chr1	-	107045491	17	+	56863080		18	279
Inter-chr complex134	chr1	+	107229169	20	+	45477448		18	279
Inter-chr complex135	chr3	+	63488456	20	+	51897531		19	279
Inter-chr complex136	chr1	+	107921149	20	+	51469478		21	279
Inter-chr complex137	chr1	+	115124224	20	-	55271279		22	279
Inter-chr complex138	chr3	-	63996543	20	-	40268294		22	279
Inter-chr complex139	chr17	+	56922963	20	+	56243576		24	279
Inter-chr complex140	chr17	-	58393014	20	+	61759254		35	279
Inter-chr complex141	chr17	-	58432939	20	+	55109117		51	279
Inter-chr complex142	chr17	-	57567785	20	+	55111445		110	279
Inter-chr complex143	chr17	+	57563705	20	+	55109259		150	279
Inter-chr complex144	chr1	+	112375872	17	+	56828883		161	279
Inter-chr complex145	chr20	+	48728632	17	-	58243448		6	279
Inter-chr complex146	chr20	-	53591399	17	-	57562739		6	279
Inter-chr complex147	chr14	-	105557448	15	-	19991874		7	4
Inter-chr complex148	chr16	-	33868773	17	-	42602311		8	29
Inter-chr complex149	chr17	+	56166242	1	-	114158033		8	279
Inter-chr complex150	chr17	+	57562700	20	-	45219019		8	279
Inter-chr complex151	chr20	-	53591408	17	+	58433647		8	279
Inter-chr complex152	chr3	-	64472063	1	+	113814363		8	279
Inter-chr complex153	chr6	-	153564854	3	-	178327962		8	279
Inter-chr complex154	chr14	+	105548008	15	+	19965189		11	4
Inter-chr complex155	chr21	-	10116467	7	-	151744196		11	5
Inter-chr complex156	chr21	+	10111666	7	+	151710877		11	5
Inter-chr complex157	chr21	-	10093224	7	-	151592039		12	5
Inter-chr complex158	chr21	+	10060050	7	+	151614463		14	5
Inter-chr complex159	chr17	-	57545644	20	+	45203540		15	279
Inter-chr complex160	chr20	+	53592680	17	+	53593836		16	279
Inter-chr complex161	chr3	-	62825534	1	+	115015117		18	279
Inter-chr complex162	chr20	-	53589433	17	+	57433185		19	279
Inter-chr complex163	chr20	-	61759821	17	-	57433185		19	279
Inter-chr complex164	chr6	+	153565577	3	+	178327209		23	279
Inter-chr complex165	chr17	-	56171458	1	+	115026338		32	279
Inter-chr complex166	chr20	+	45203488	17	-	58433646		39	279
Inter-chr complex167	chr20	-	53590332	17	-	57543037		46	279
Inter-chr complex168	chr3	+	62825761	1	-	114563921		46	279
Inter-chr complex169	chr20	+	53592693	17	-	57562508		49	279
Inter-chr complex170	chr20	+	45221689	17	-	57433204		109	279
Inter-chr complex171	chr20	-	45212475	17	+	57341209		113	279
Inter-chr complex172	chr20	+	45218911	17	-	58392946		134	279

## Sheet: legend
ID	specific tructural variation ID
Location	the coordinate of deletion or tandem duplication
Span	size of deleted or tandremrepeated genomic segment or distance between breakpoints on different strands of the same chromosome
1kb count	cluster count of 1kb library
10kb count	cluster count of 10kb library
Supercluster count	number of clusters which are close to each other (supercluster size)
Chr	chromosome
Strand L	strand of the left anchor of the cluster
Location L	breakpoint position of the left anchor of the cluster
Strand R	strand of the right anchor of the cluster
Location R	breakpoint position of the right anchor of the cluster
Chr L	chromosome of the left anchor of the cluster
Chr R	chromosome of the right anchor of the cluster
Inversion Segment	for inversions: coordinates of inverted regions
1kb count 1	for inversion and insertion: there are two clusters of one inversion or insertion, the count of one cluster from 1kb library
1kb count 2	for inversion and insertion: there are two clusters of one inversion or insertion, the count of the other cluster from 1kb library
10kb count 1	for inversion and insertion: there are two clusters of one inversion or insertion, the count of one cluster from 10kb library
10kb count 2	for inversion and insertion: there are two clusters of one inversion or insertion, the count of the other cluster from 10kb library
Supercluster count1	for inversion and insertion: there are two clusters of one inversion or insertion, the number of clusters which are close to each other for one of the cluster
Supercluster count2	for inversion and insertion: there are two clusters of one inversion or insertion, the number of clusters which are close to each other for the other cluster
Parental Segment	for insertion: coordinate of the parental chromosome where the fragment is inserted
Insertion Segment	for insertion: coordinate of the inserted fragment
Insertion Span	for insertion: size of inserted genomic fragment
