# Supplementary figures and images for: Long Span DNA Paired-End-Tag (DNA-PET) Sequencing Strategy for the Interrogation of Genomic Structural Mutations and Fusion-Point-Guided Reconstruction of Amplicons
Source: PLOS journal article supplement (doi:10.1371/journal.pone.0046152), 2012-09-28

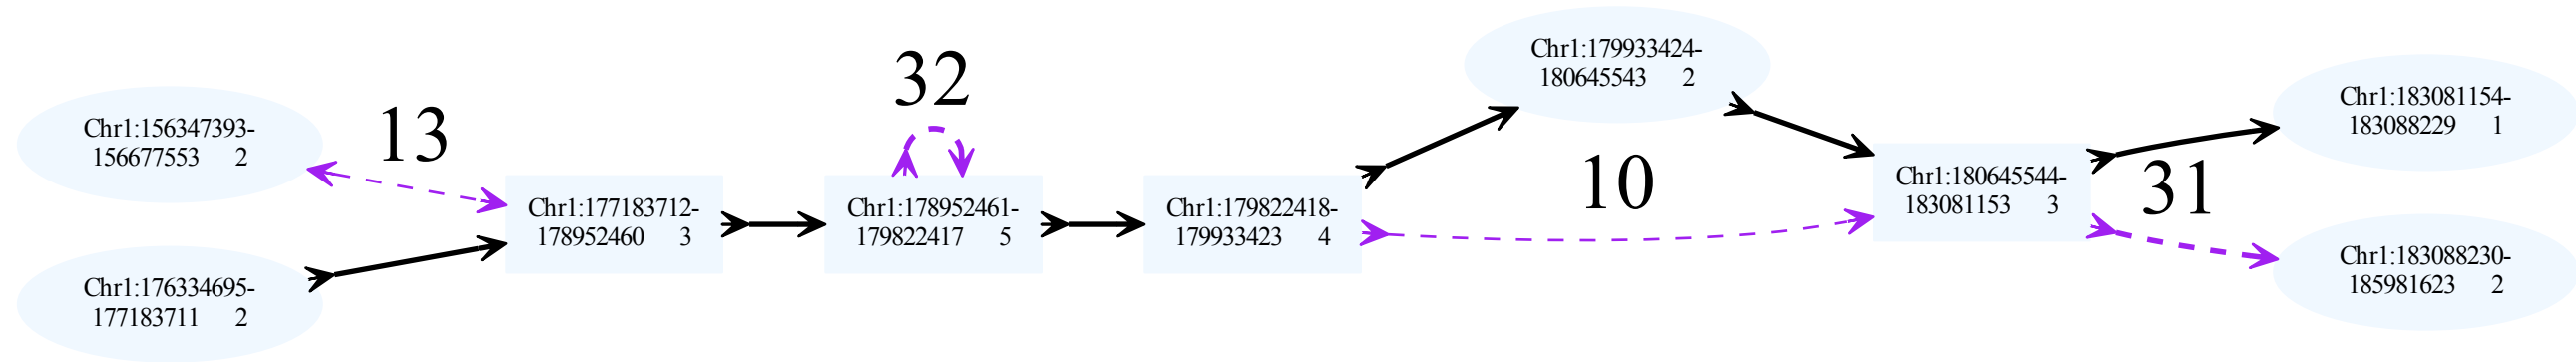

Supplement: S17 (10.1371/journal.pone.0046152.s017) [file journal.pone.0046152.s017]

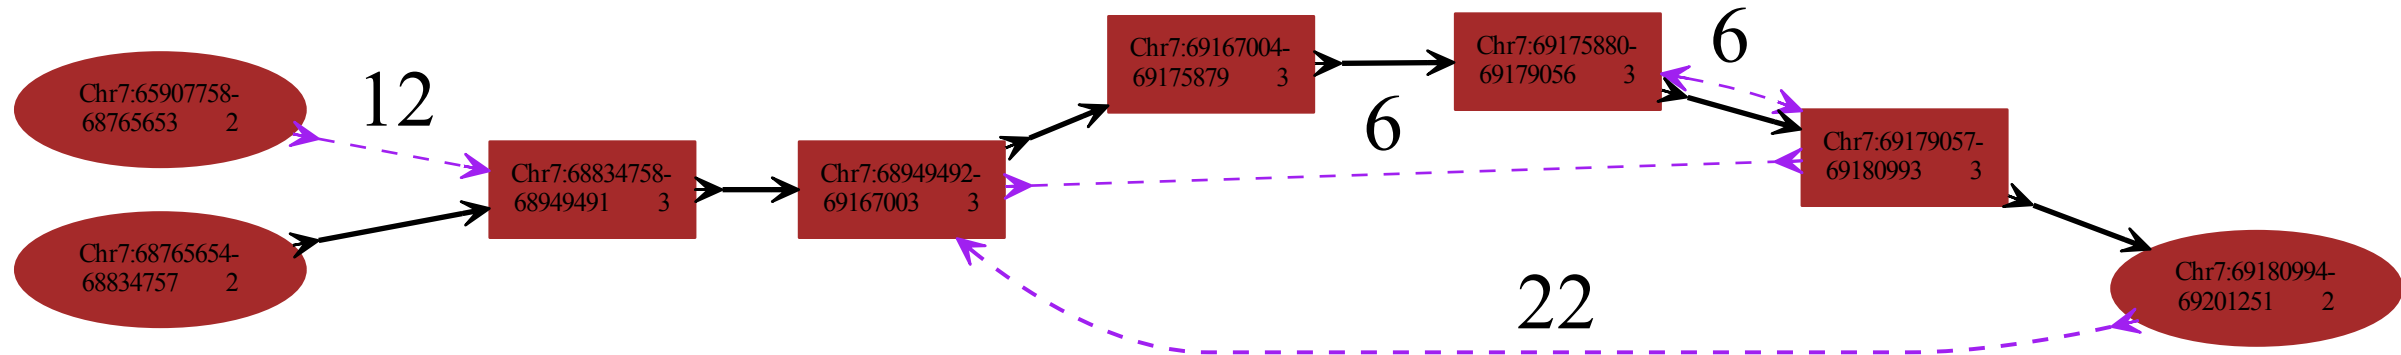

Supplement: S17 (10.1371/journal.pone.0046152.s017) [file journal.pone.0046152.s017]

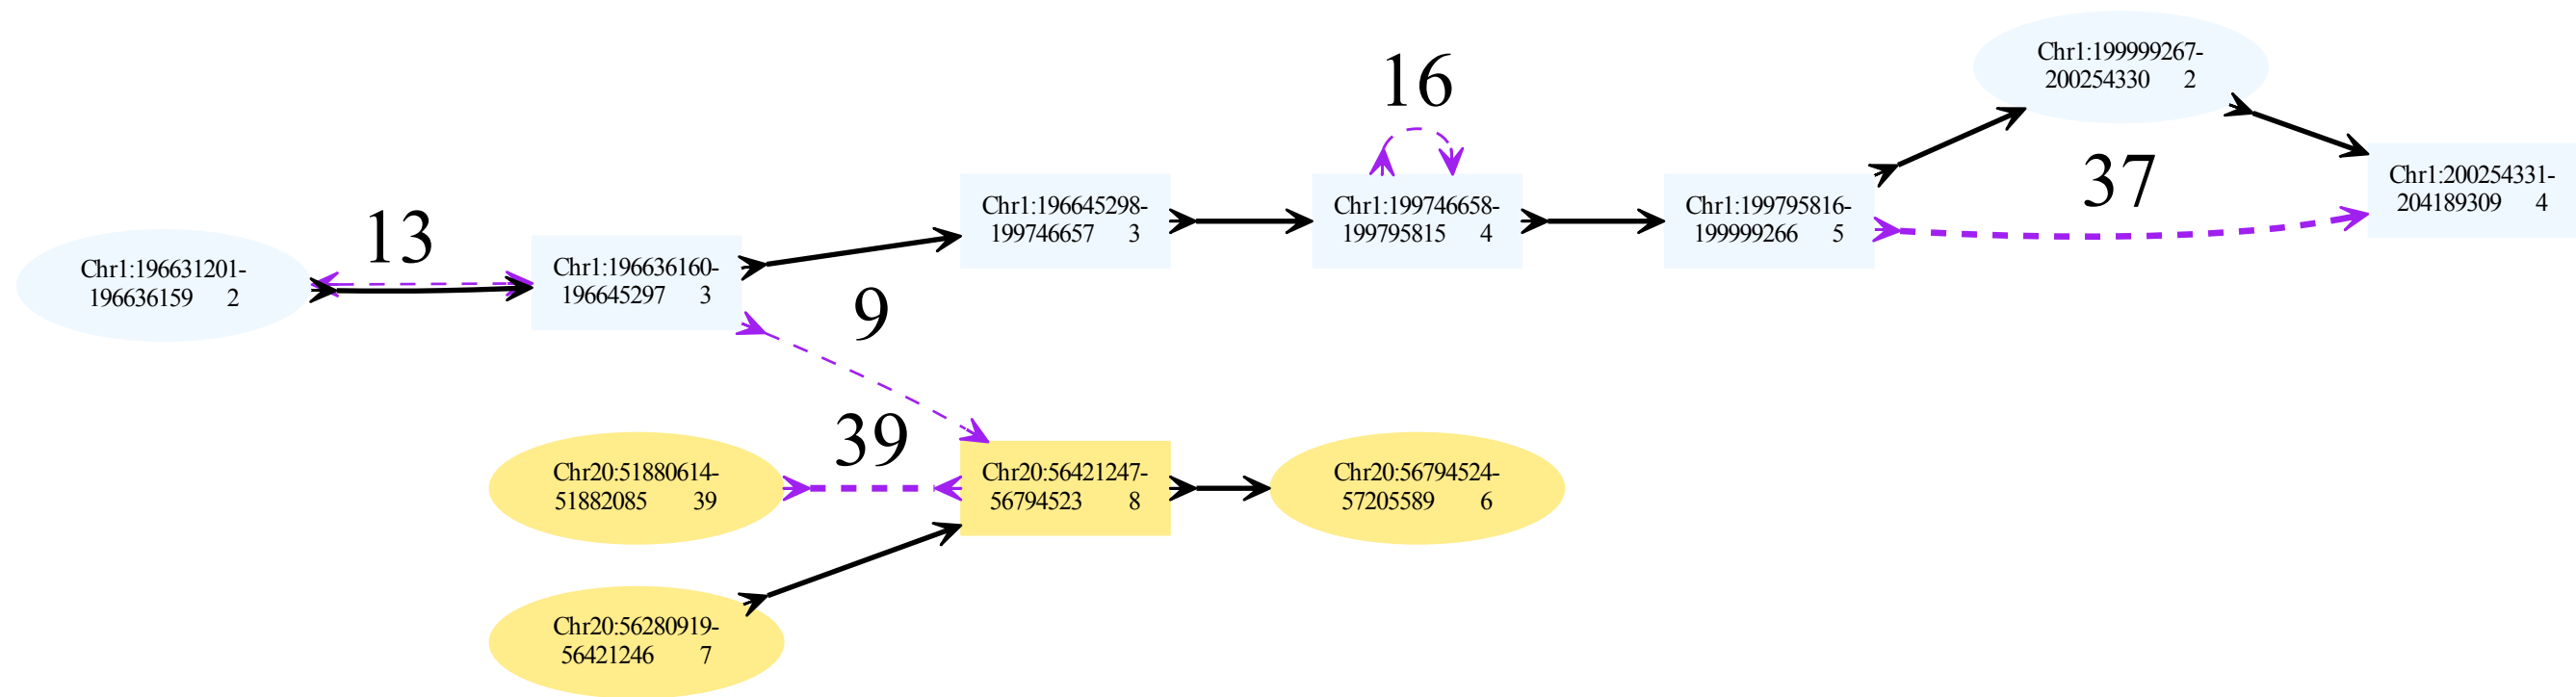

Supplement: S17 (10.1371/journal.pone.0046152.s017) [file journal.pone.0046152.s017]

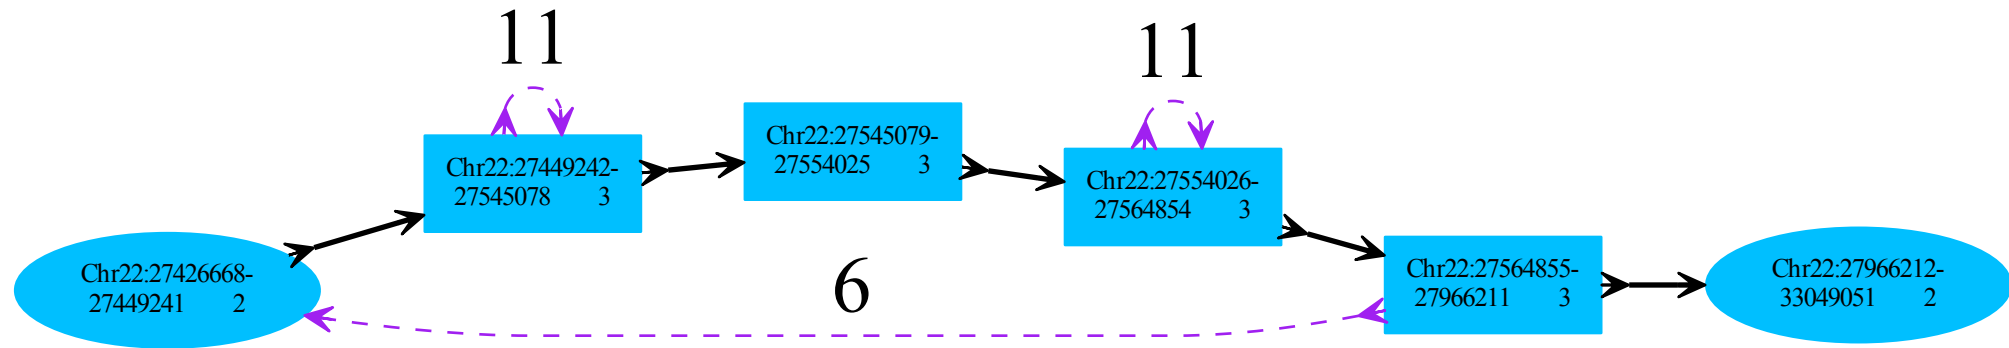

Supplement: S17 (10.1371/journal.pone.0046152.s017) [file journal.pone.0046152.s017]

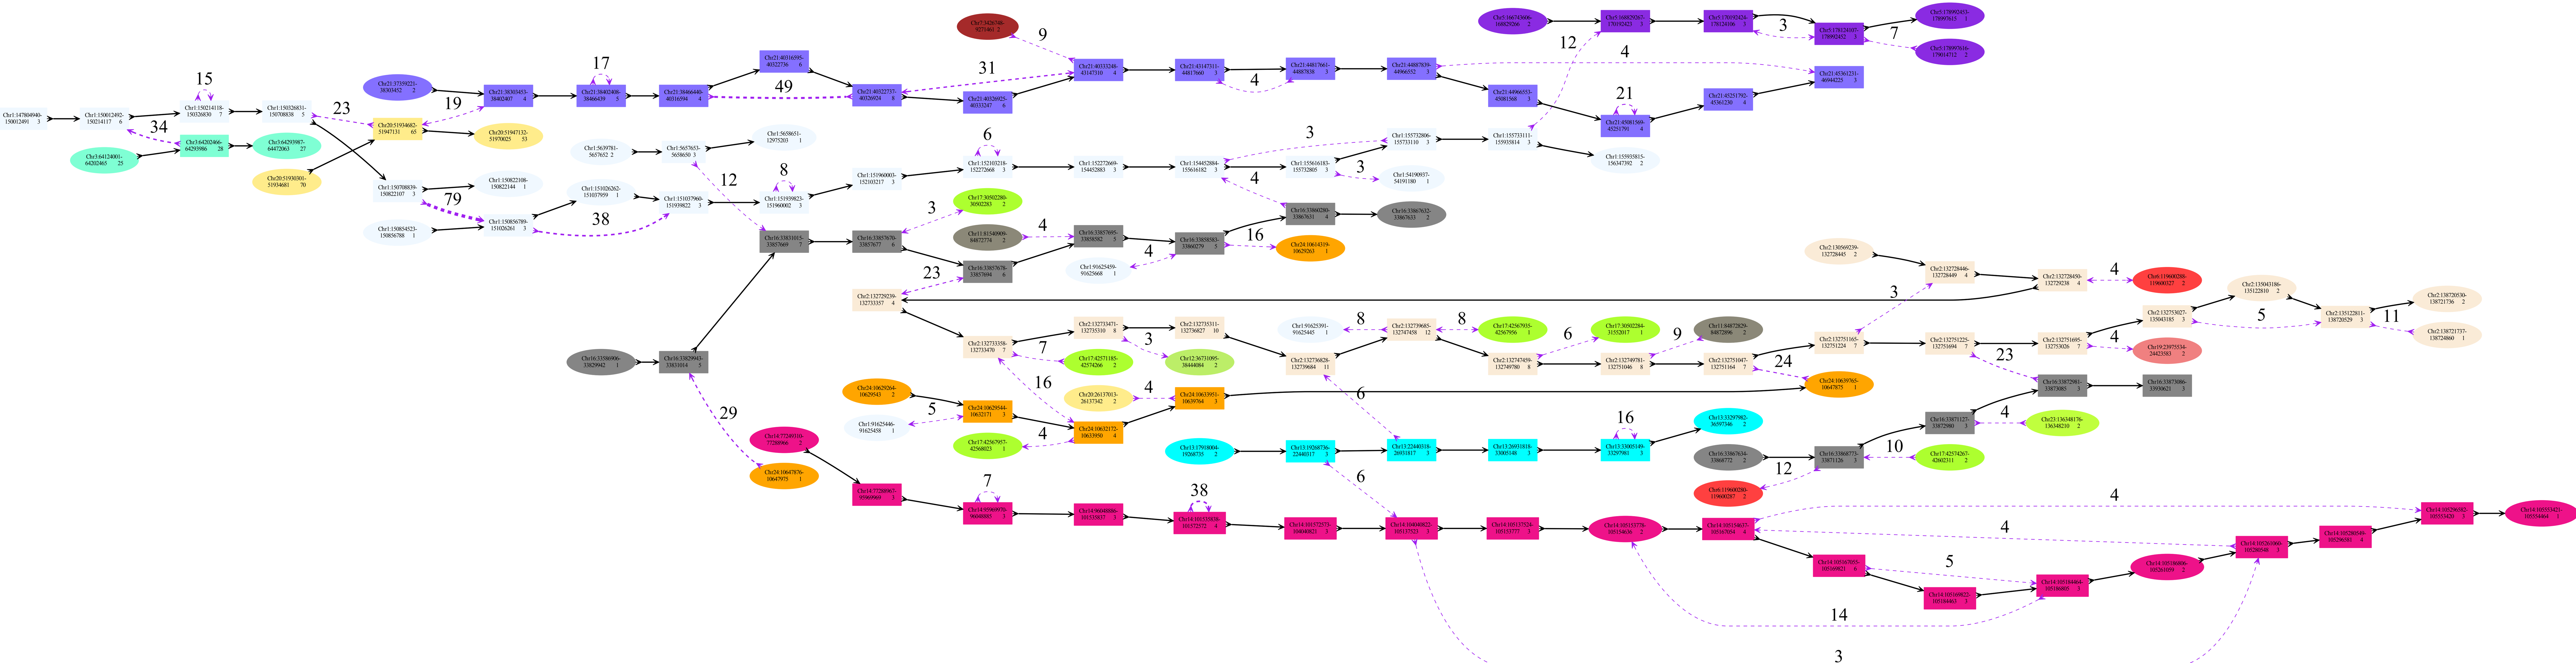

Supplement: S17 (10.1371/journal.pone.0046152.s017) [file journal.pone.0046152.s017]

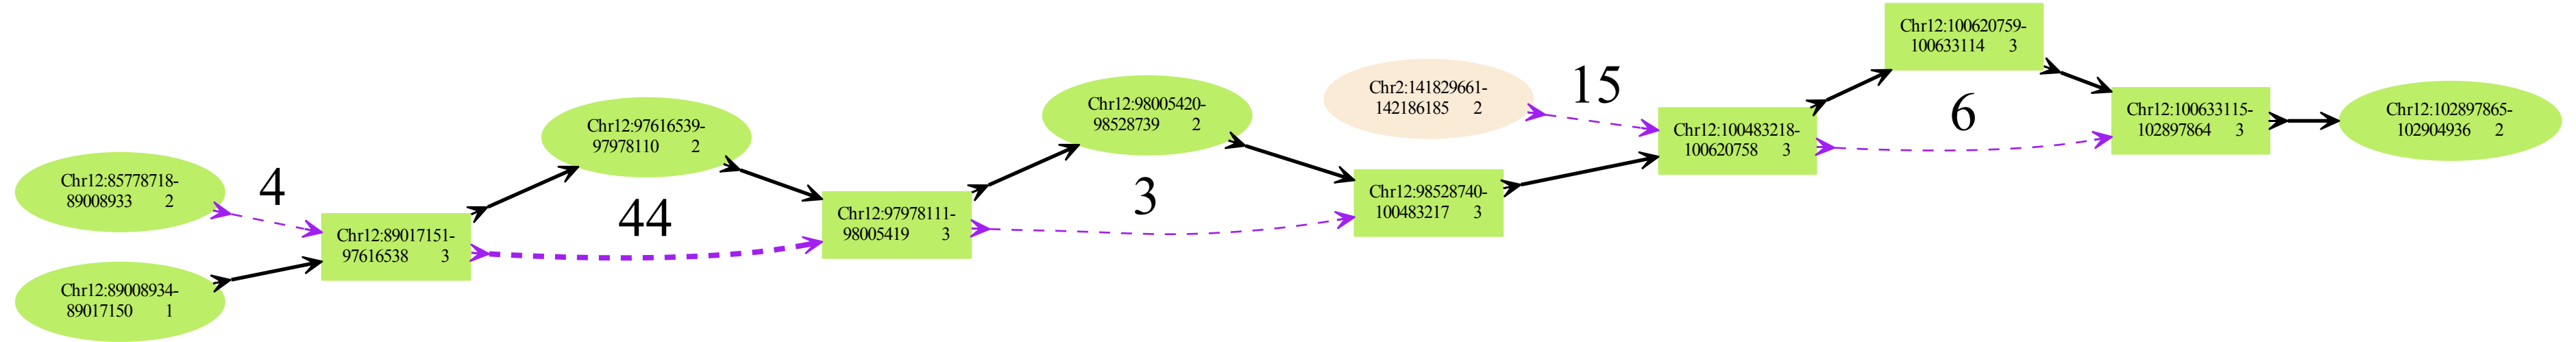

Supplement: S17 (10.1371/journal.pone.0046152.s017) [file journal.pone.0046152.s017]

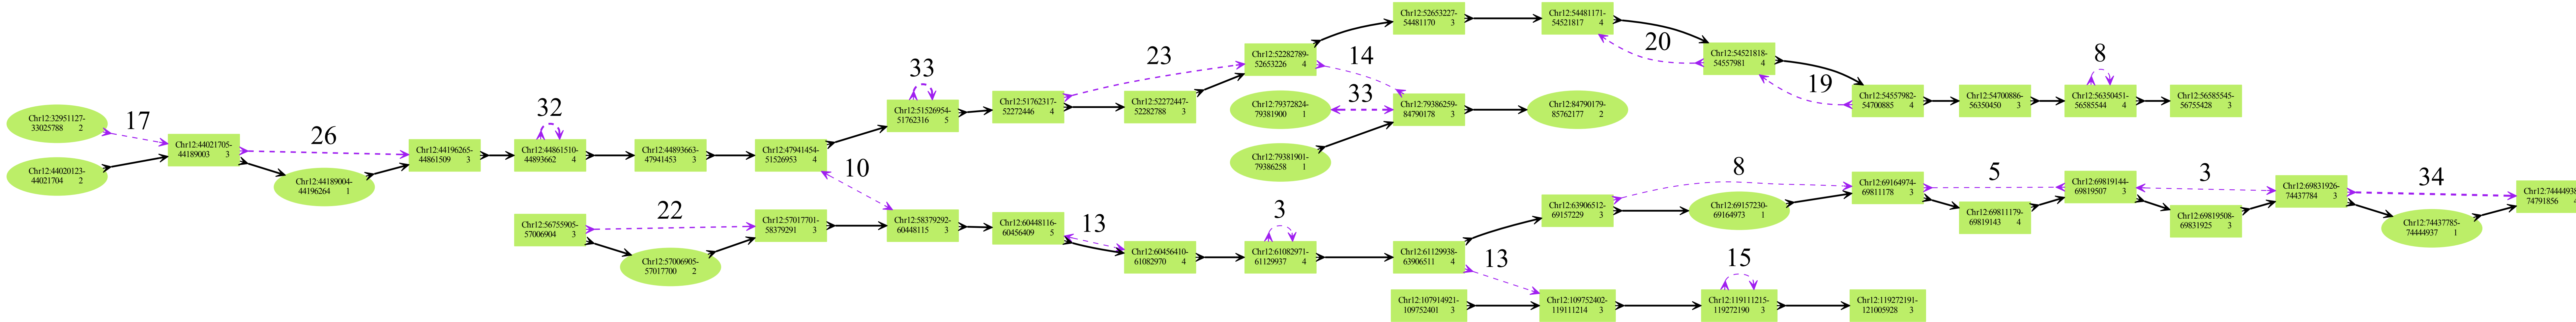

Supplement: S17 (10.1371/journal.pone.0046152.s017) [file journal.pone.0046152.s017]

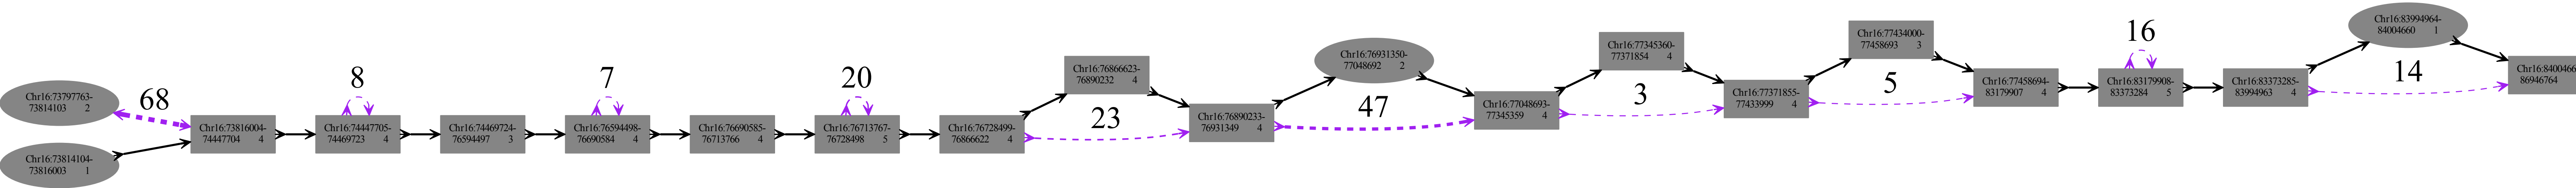

Supplement: S17 (10.1371/journal.pone.0046152.s017) [file journal.pone.0046152.s017]

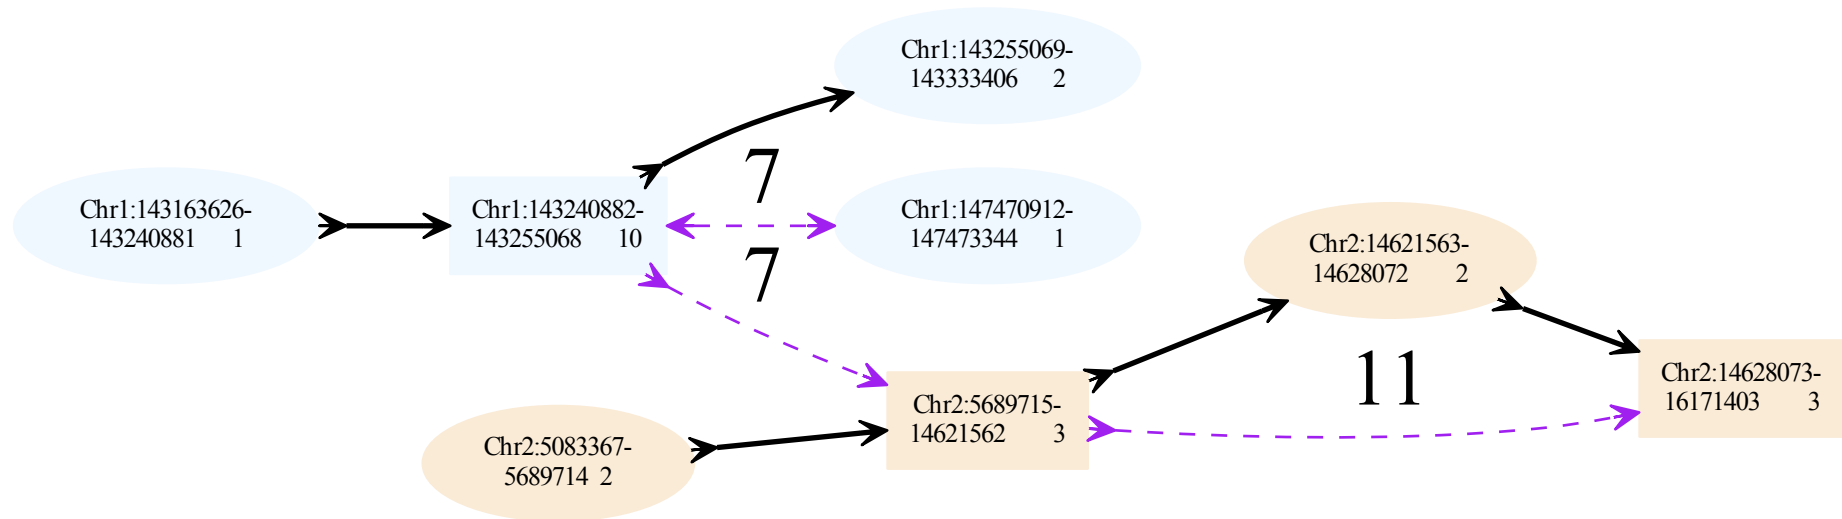

Supplement: S17 (10.1371/journal.pone.0046152.s017) [file journal.pone.0046152.s017]

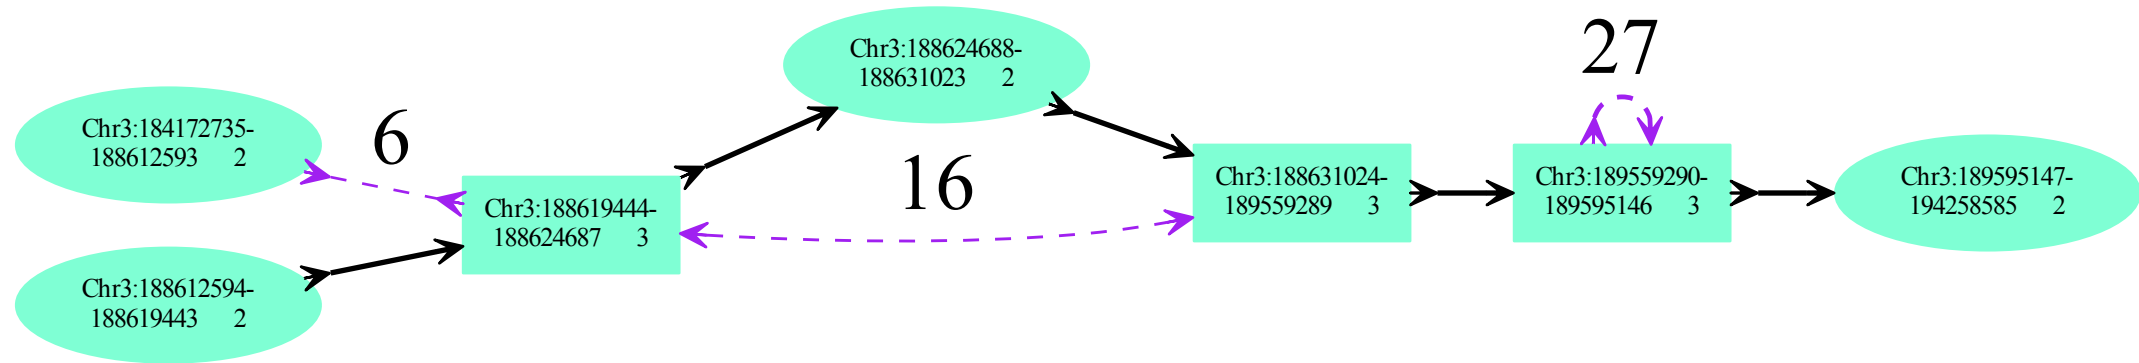

Supplement: S17 (10.1371/journal.pone.0046152.s017) [file journal.pone.0046152.s017]

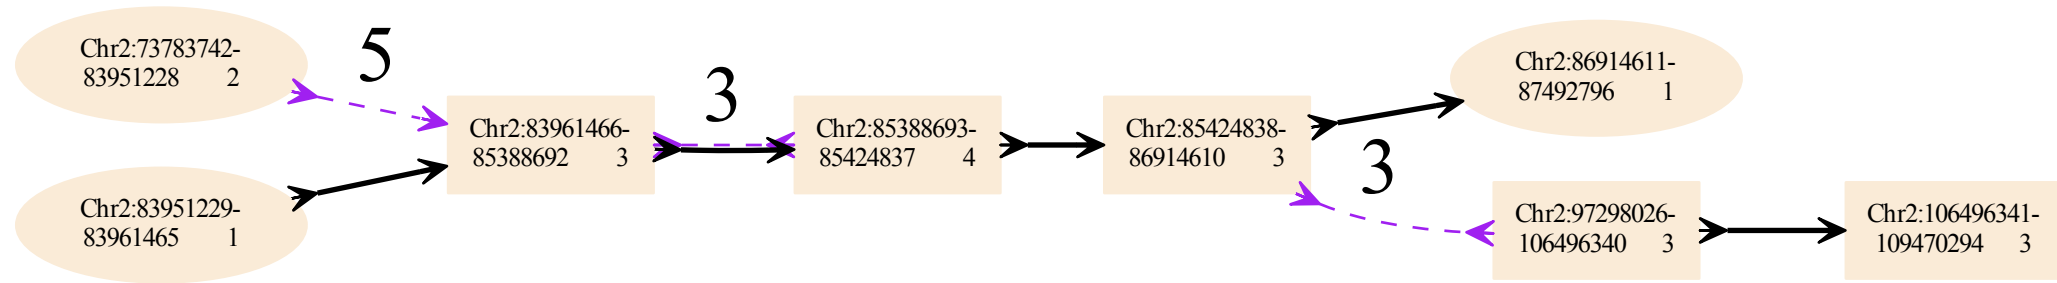

Supplement: S17 (10.1371/journal.pone.0046152.s017) [file journal.pone.0046152.s017]

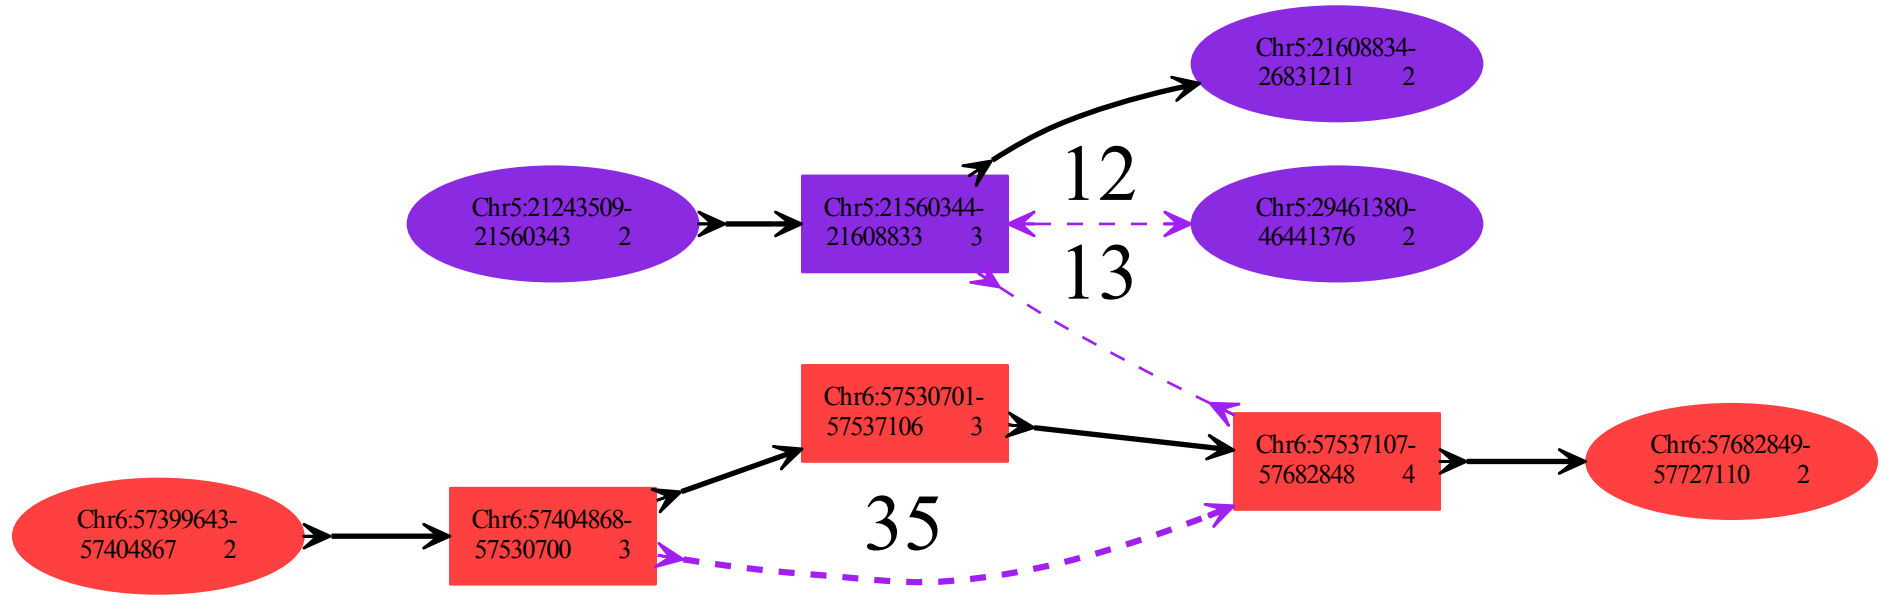

Supplement: S17 (10.1371/journal.pone.0046152.s017) [file journal.pone.0046152.s017]

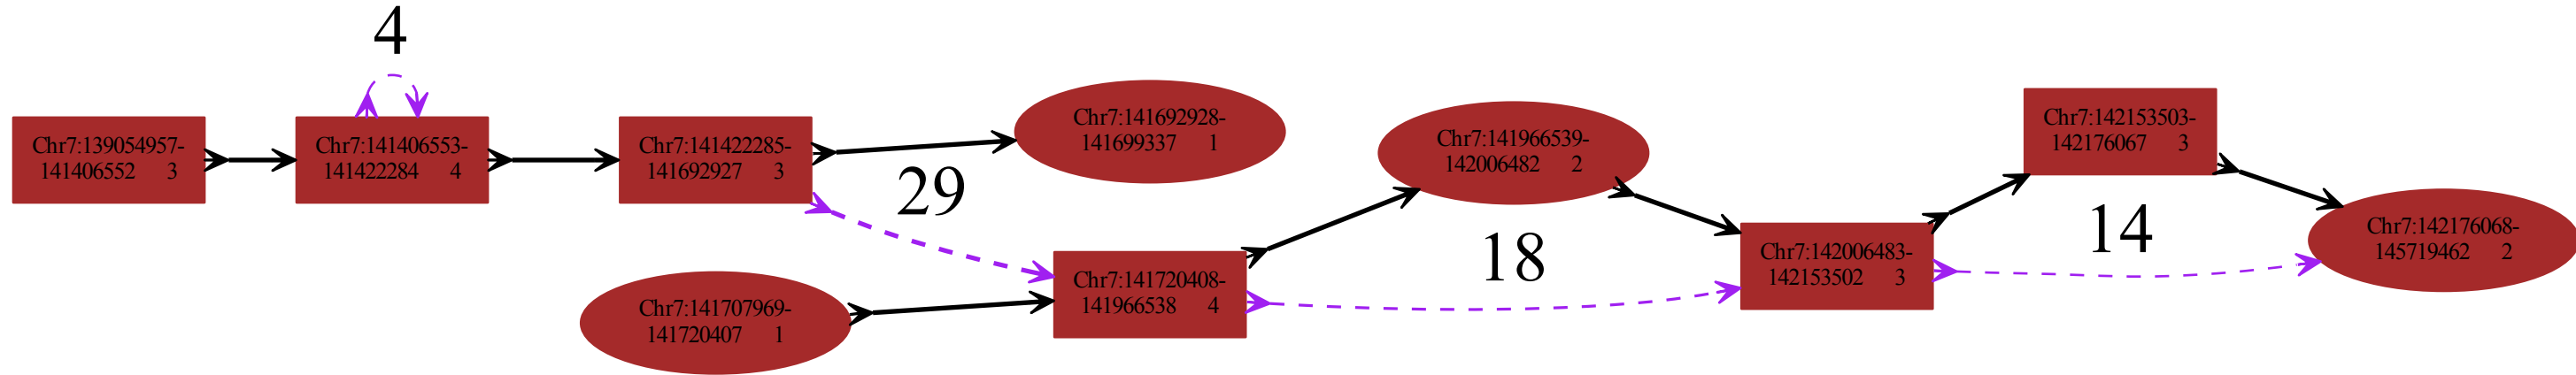

Supplement: S17 (10.1371/journal.pone.0046152.s017) [file journal.pone.0046152.s017]

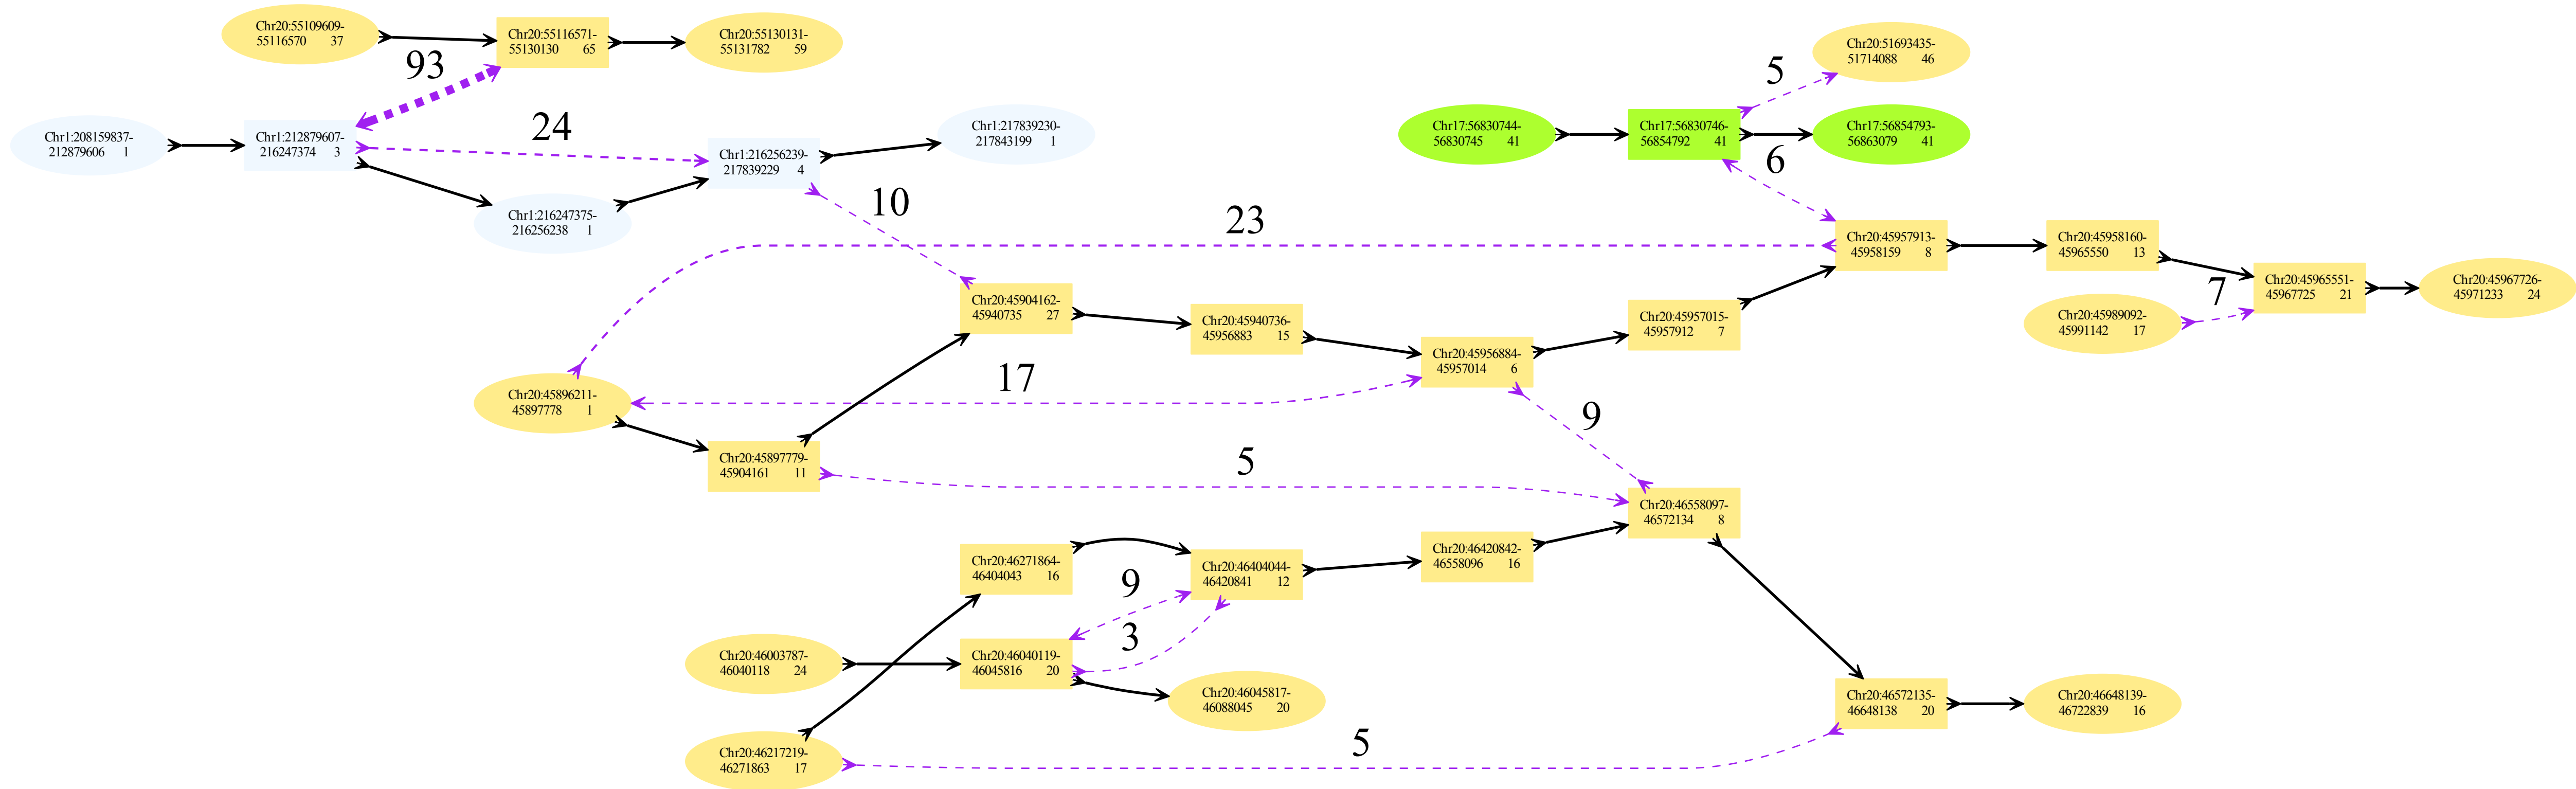

Supplement: S17 (10.1371/journal.pone.0046152.s017) [file journal.pone.0046152.s017]

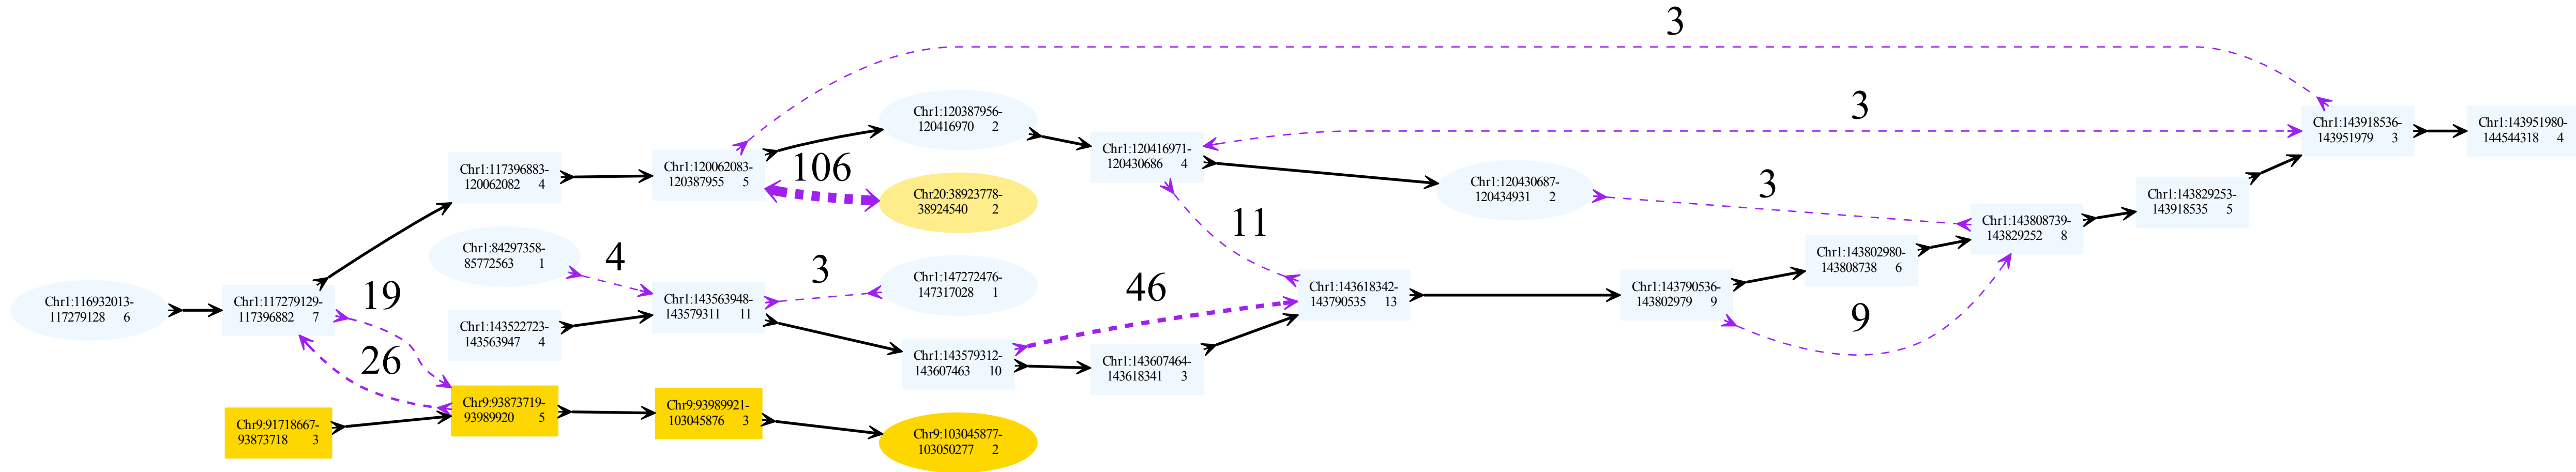

Supplement: S17 (10.1371/journal.pone.0046152.s017) [file journal.pone.0046152.s017]

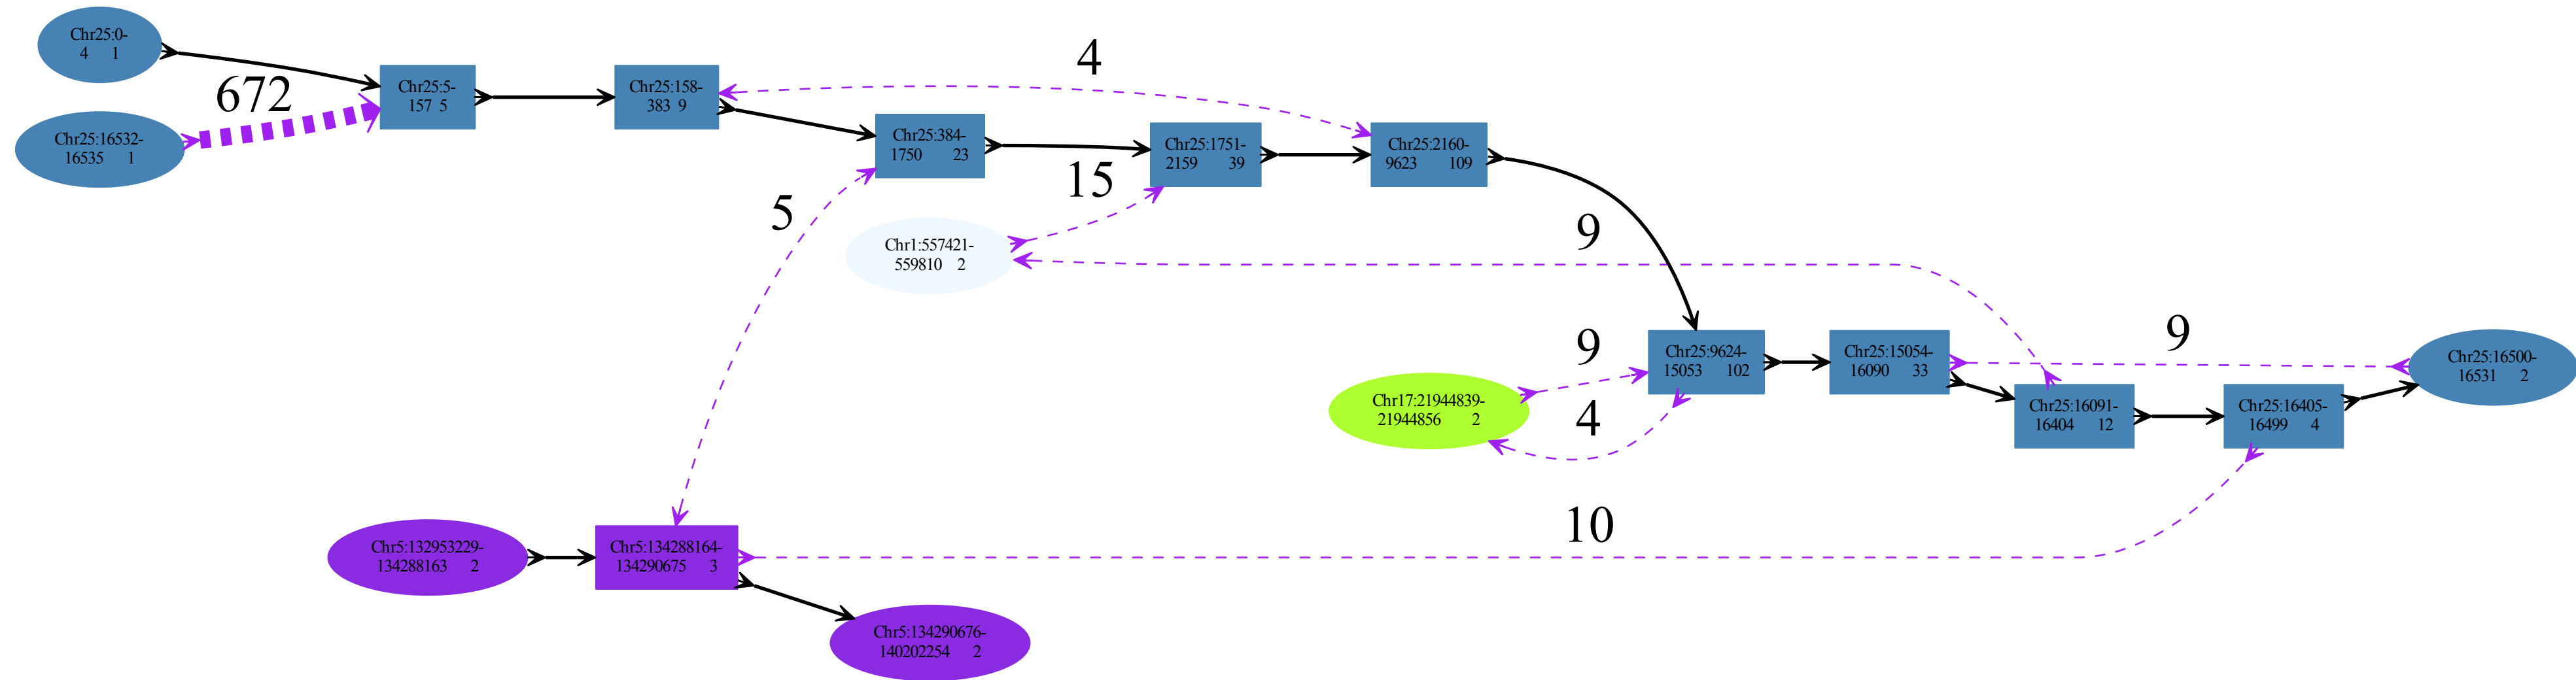

Supplement: S17 (10.1371/journal.pone.0046152.s017) [file journal.pone.0046152.s017]

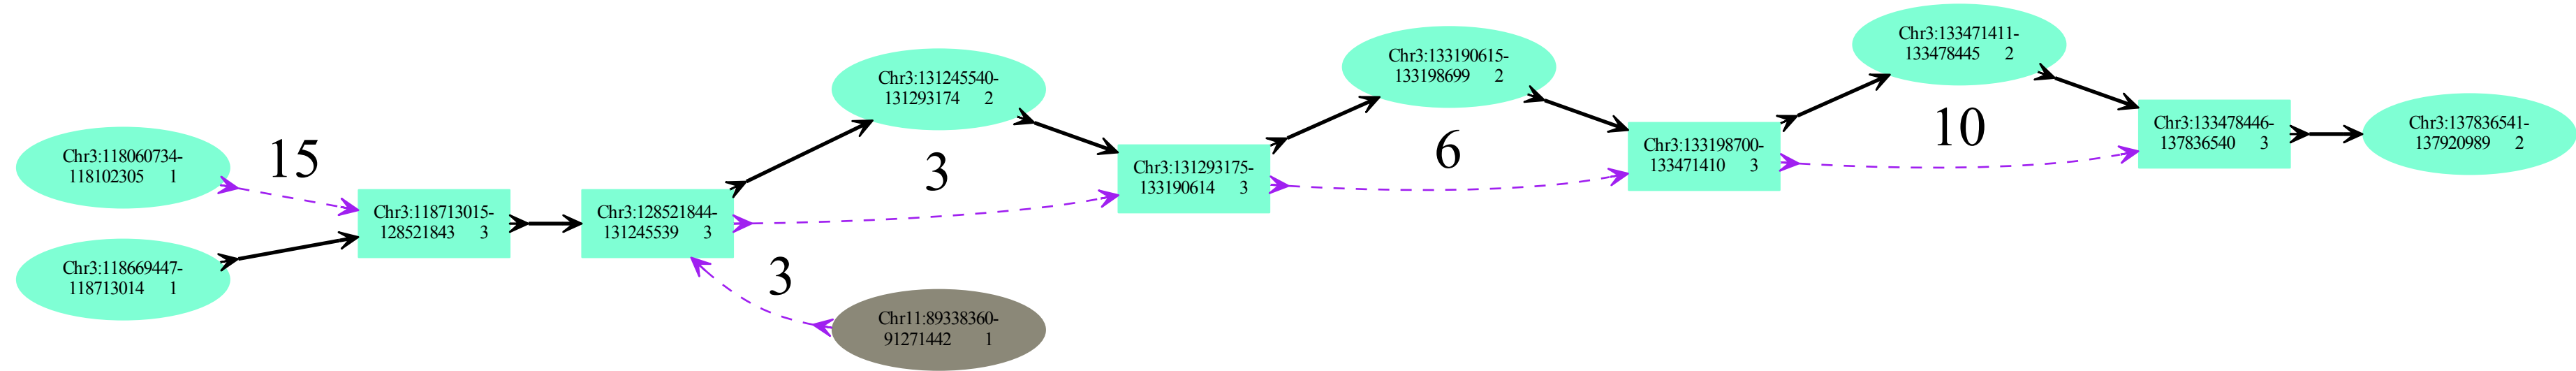

Supplement: S17 (10.1371/journal.pone.0046152.s017) [file journal.pone.0046152.s017]

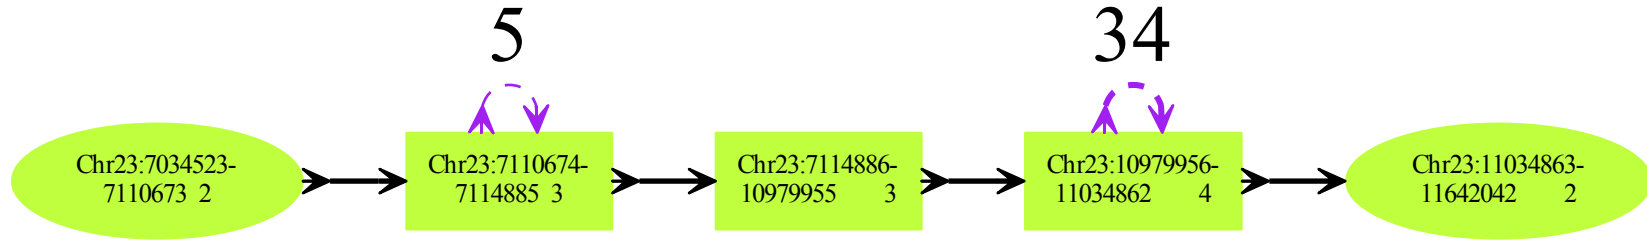

Supplement: S17 (10.1371/journal.pone.0046152.s017) [file journal.pone.0046152.s017]

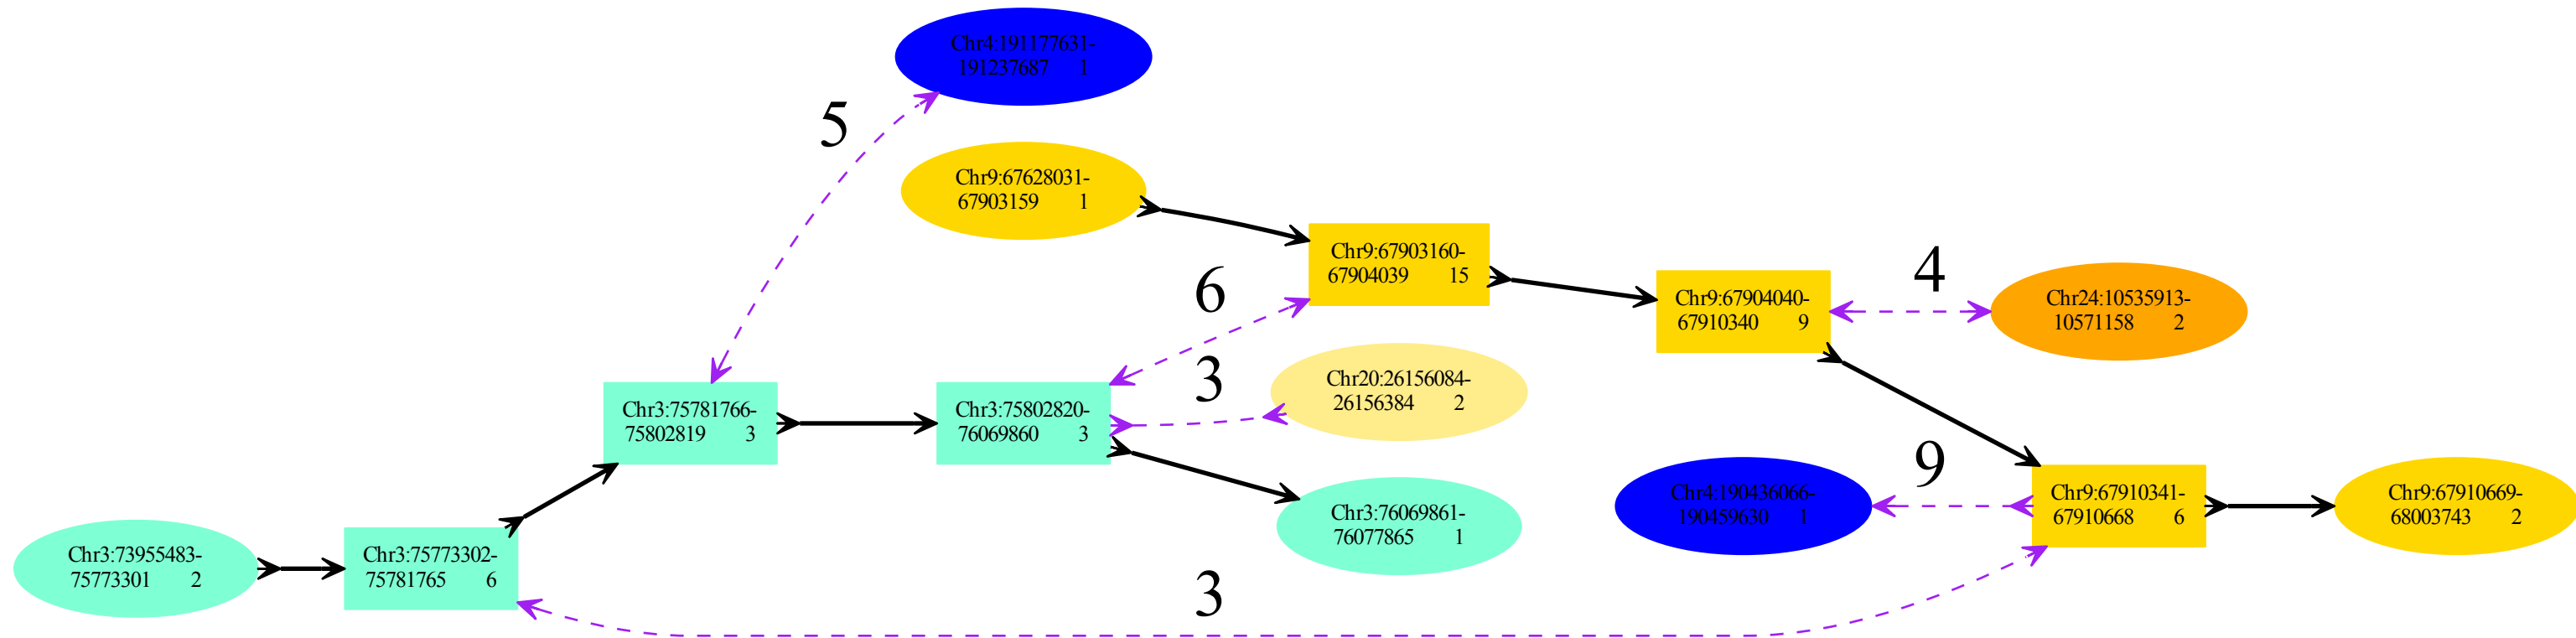

Supplement: S17 (10.1371/journal.pone.0046152.s017) [file journal.pone.0046152.s017]

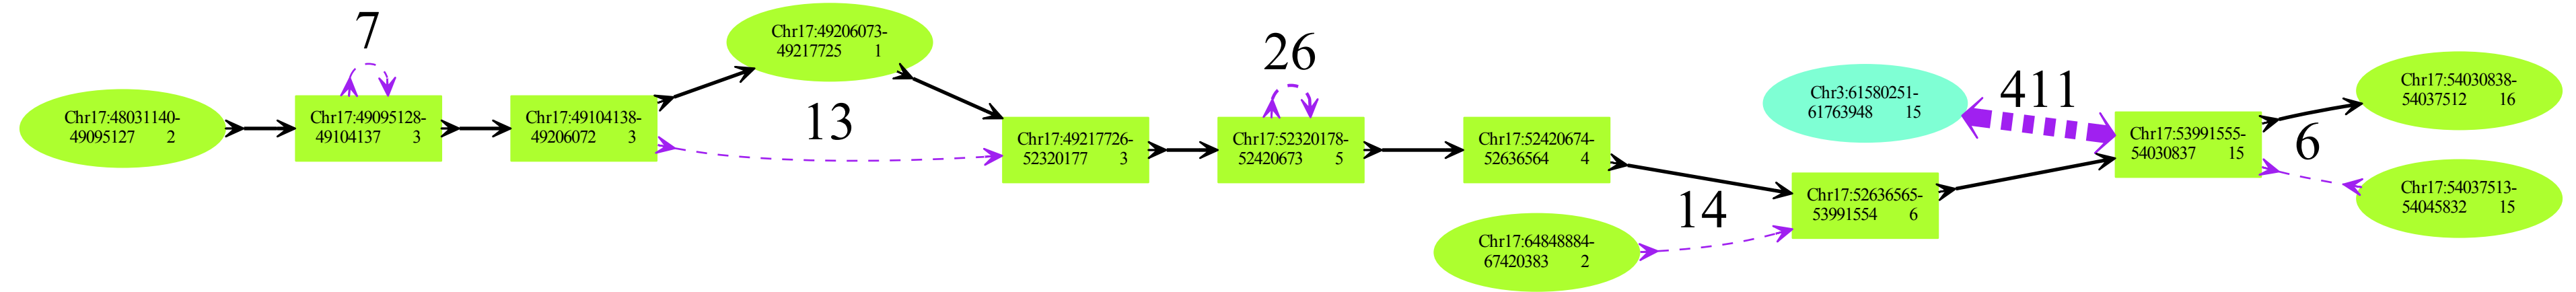

Supplement: S17 (10.1371/journal.pone.0046152.s017) [file journal.pone.0046152.s017]

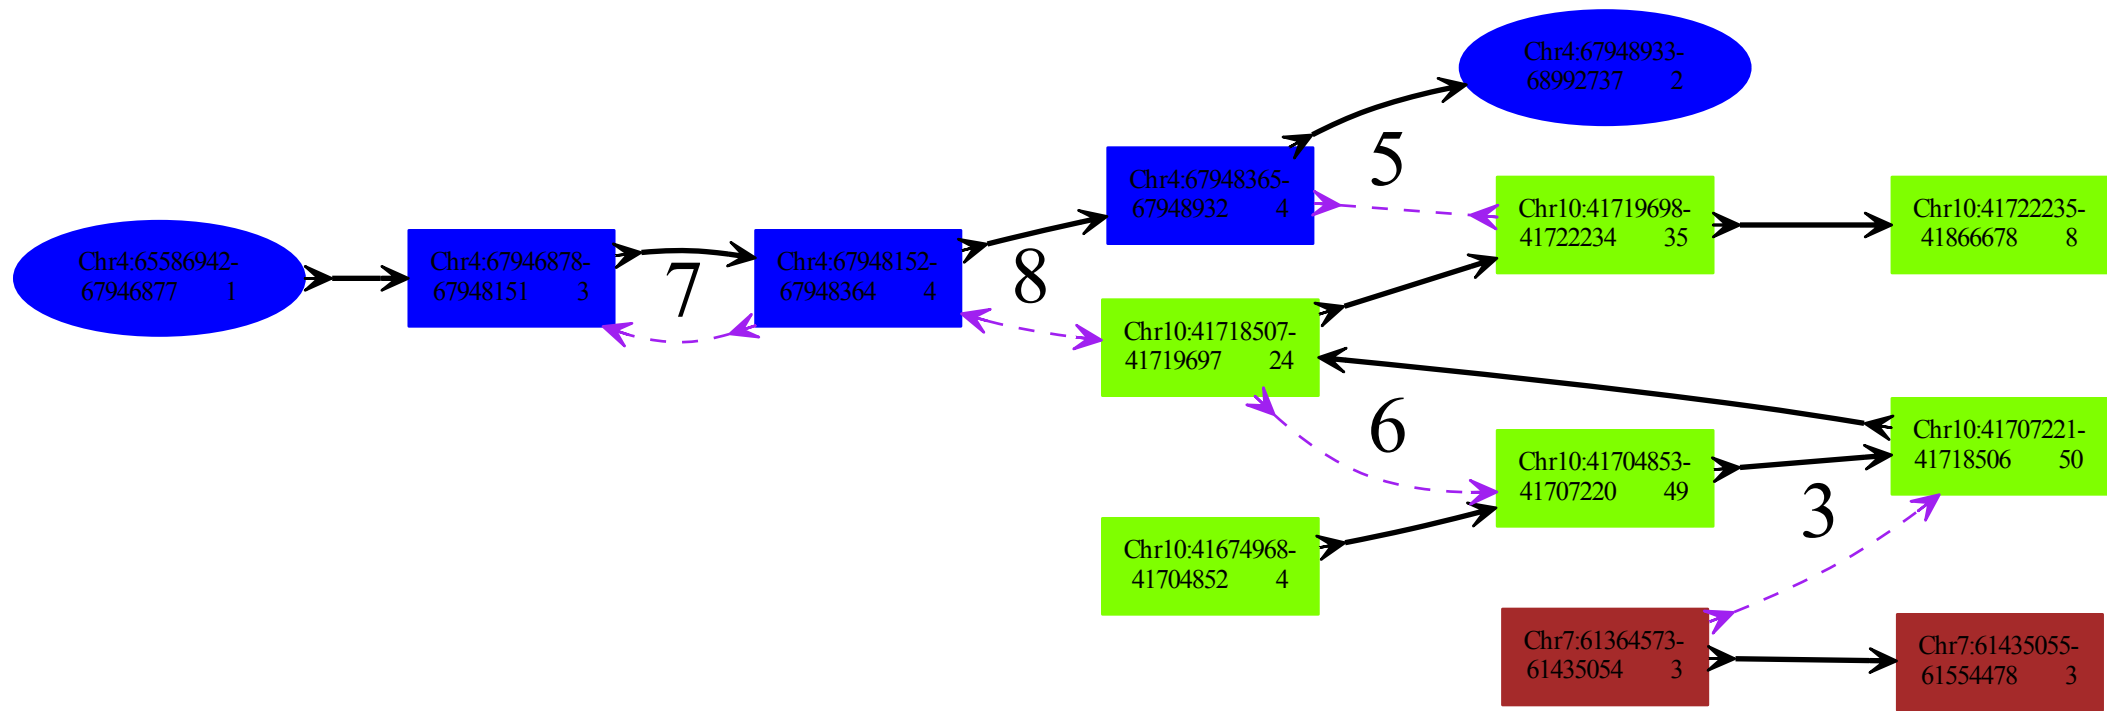

Supplement: S17 (10.1371/journal.pone.0046152.s017) [file journal.pone.0046152.s017]

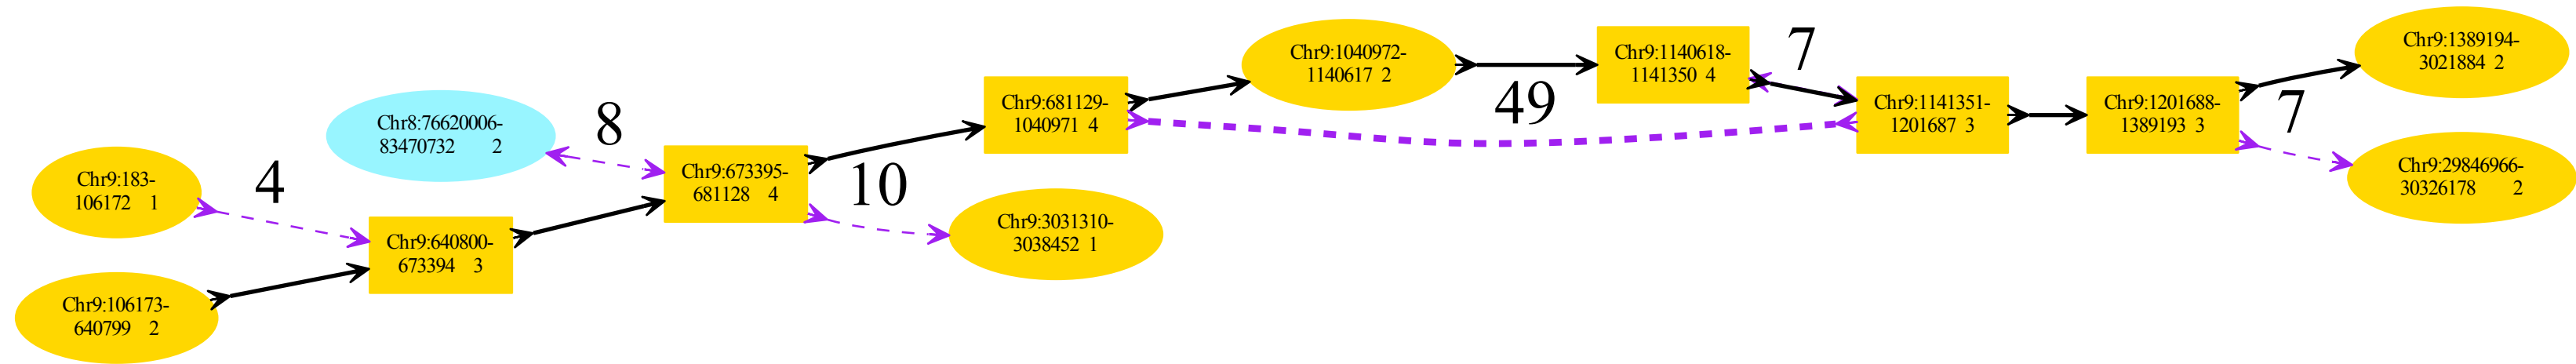

Supplement: S17 (10.1371/journal.pone.0046152.s017) [file journal.pone.0046152.s017]

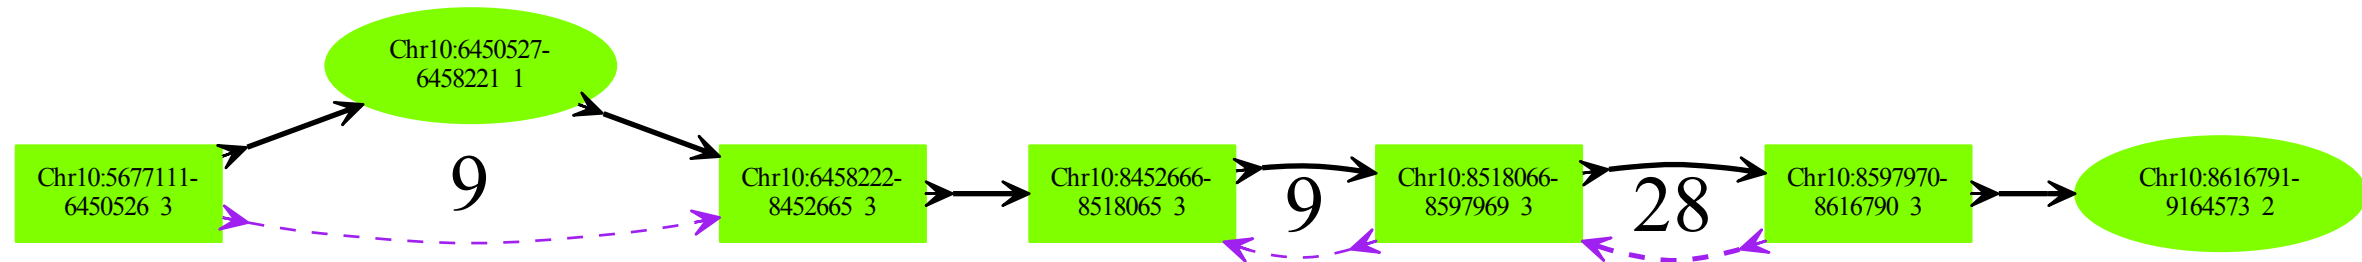

Supplement: S17 (10.1371/journal.pone.0046152.s017) [file journal.pone.0046152.s017]

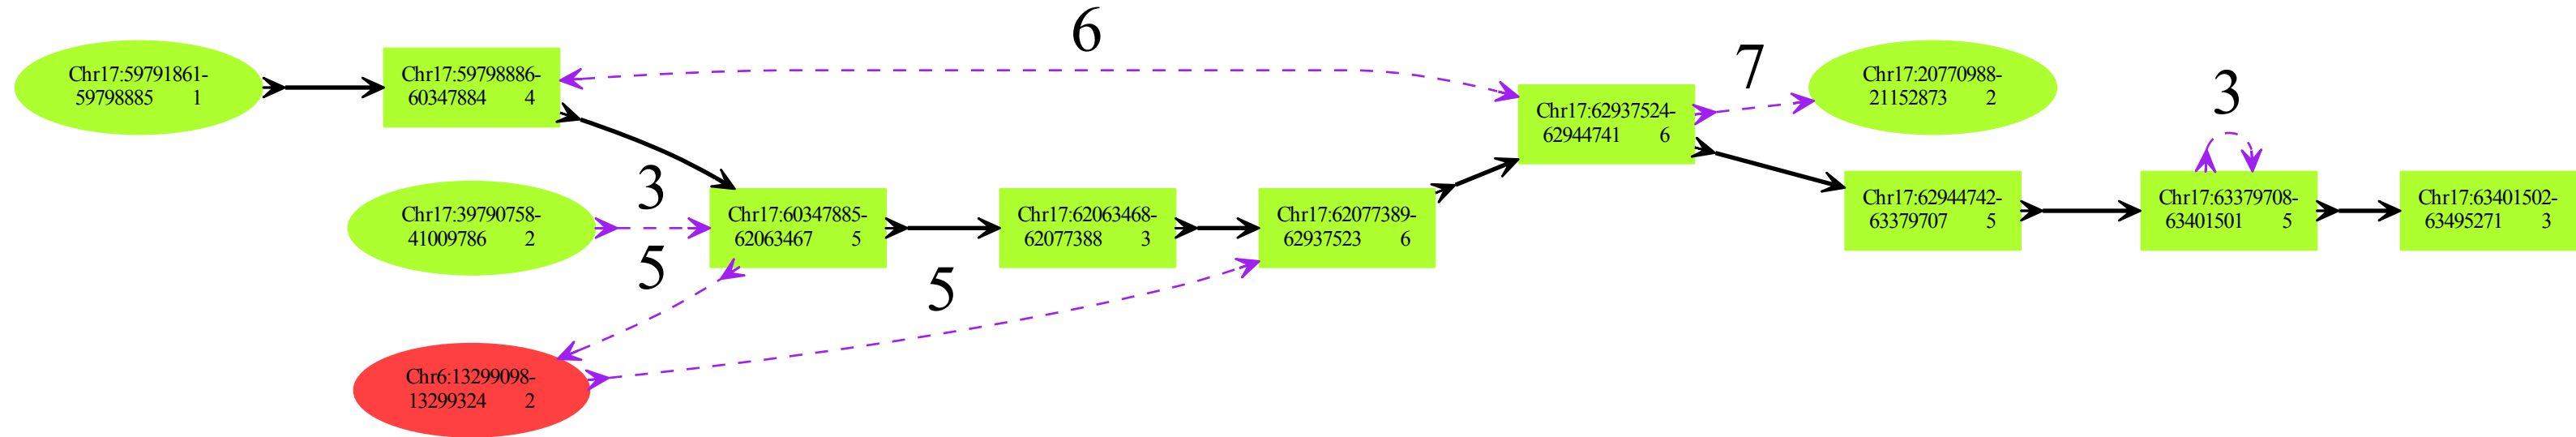

Supplement: S17 (10.1371/journal.pone.0046152.s017) [file journal.pone.0046152.s017]

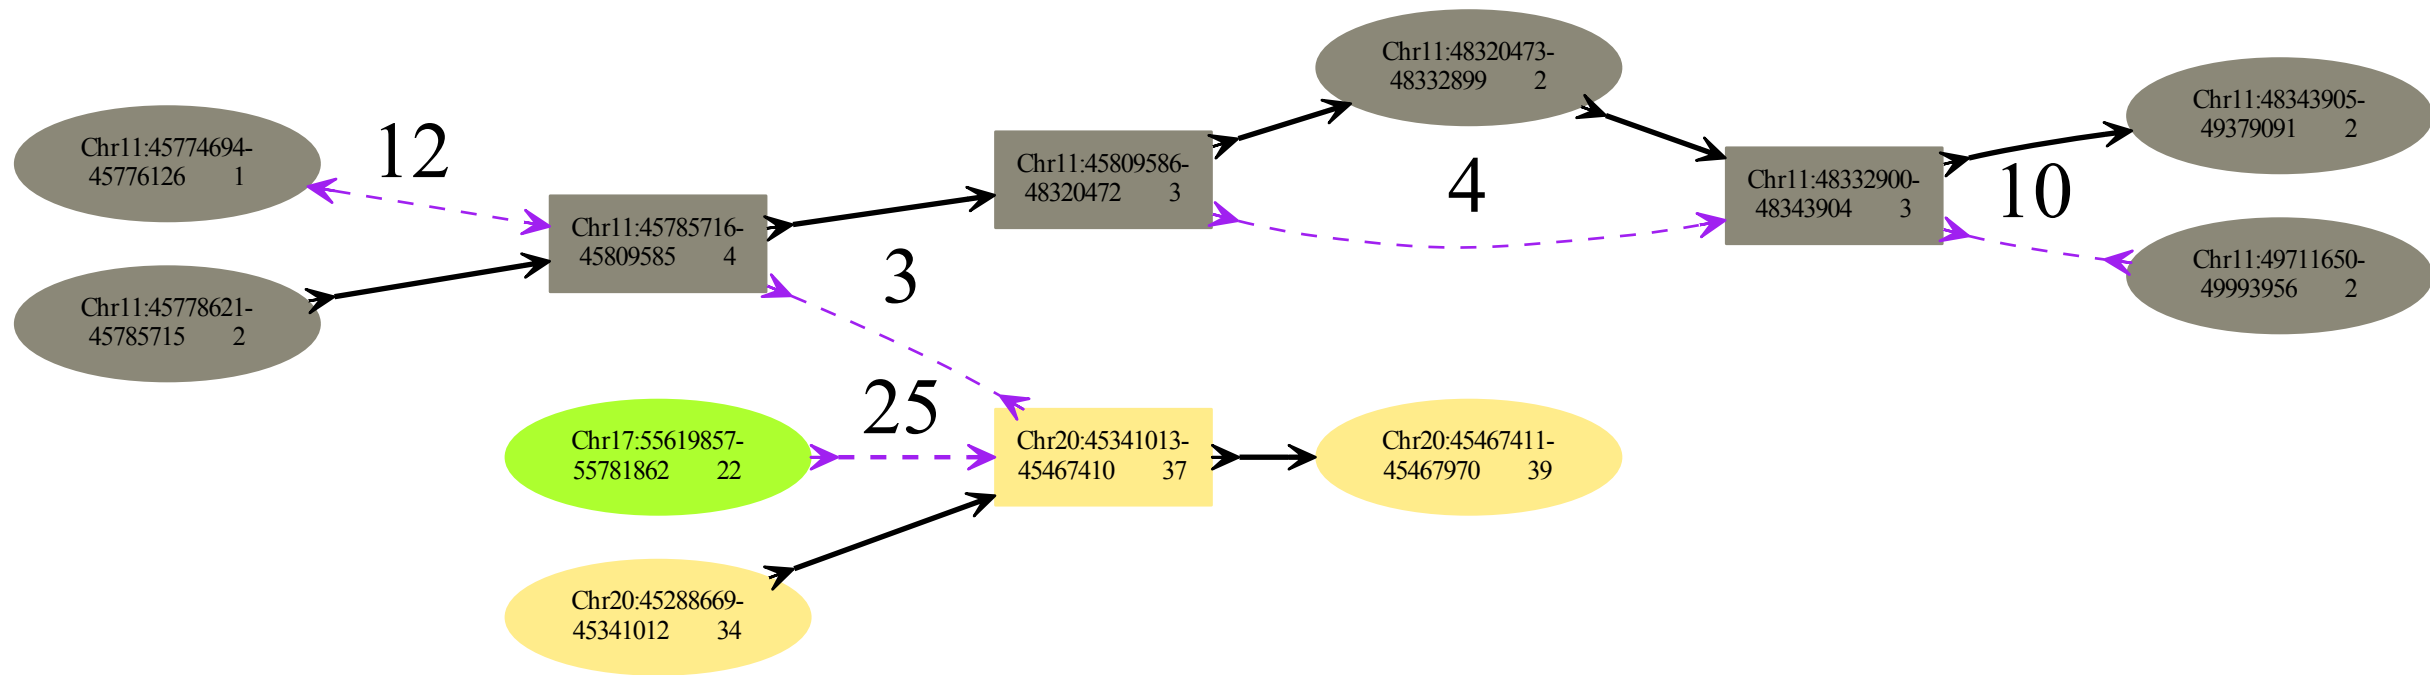

Supplement: S17 (10.1371/journal.pone.0046152.s017) [file journal.pone.0046152.s017]

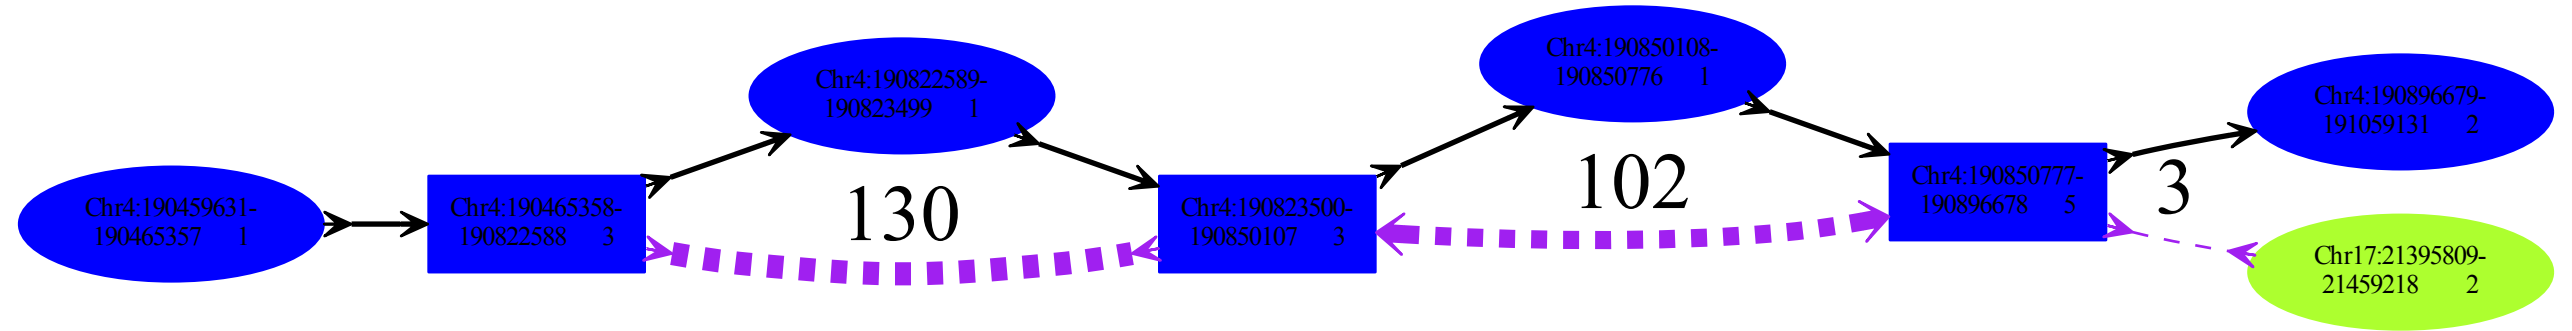

Supplement: S17 (10.1371/journal.pone.0046152.s017) [file journal.pone.0046152.s017]

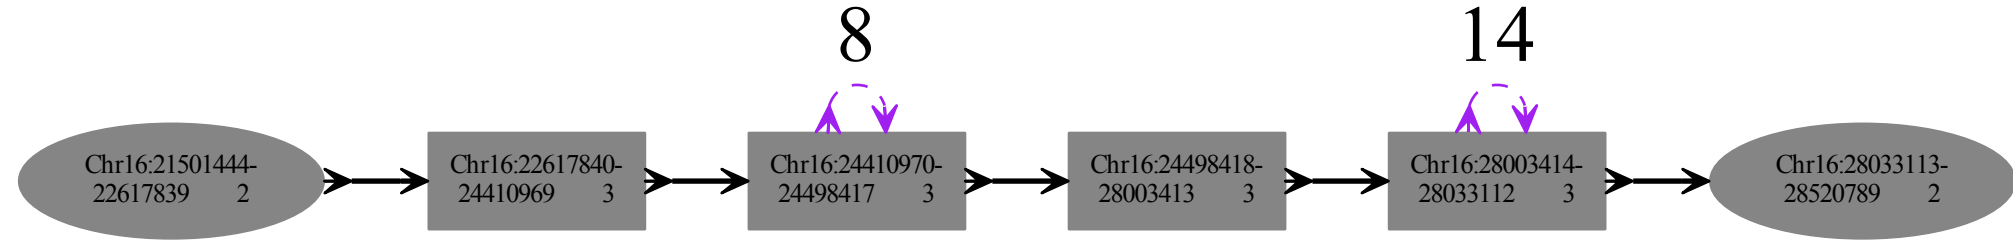

Supplement: S17 (10.1371/journal.pone.0046152.s017) [file journal.pone.0046152.s017]

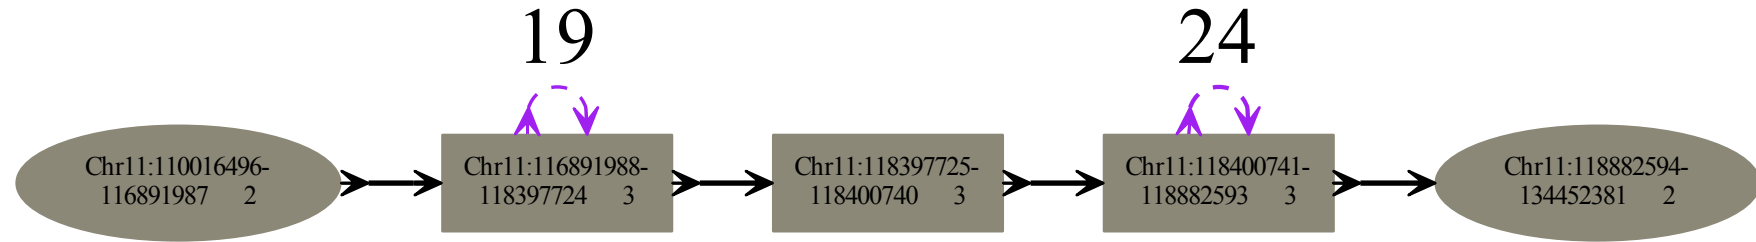

Supplement: S17 (10.1371/journal.pone.0046152.s017) [file journal.pone.0046152.s017]

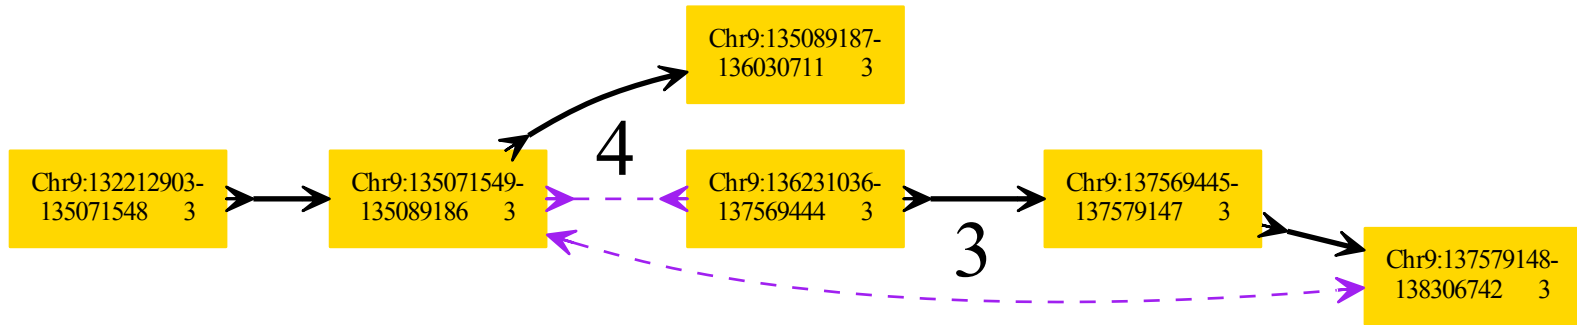

Supplement: S17 (10.1371/journal.pone.0046152.s017) [file journal.pone.0046152.s017]

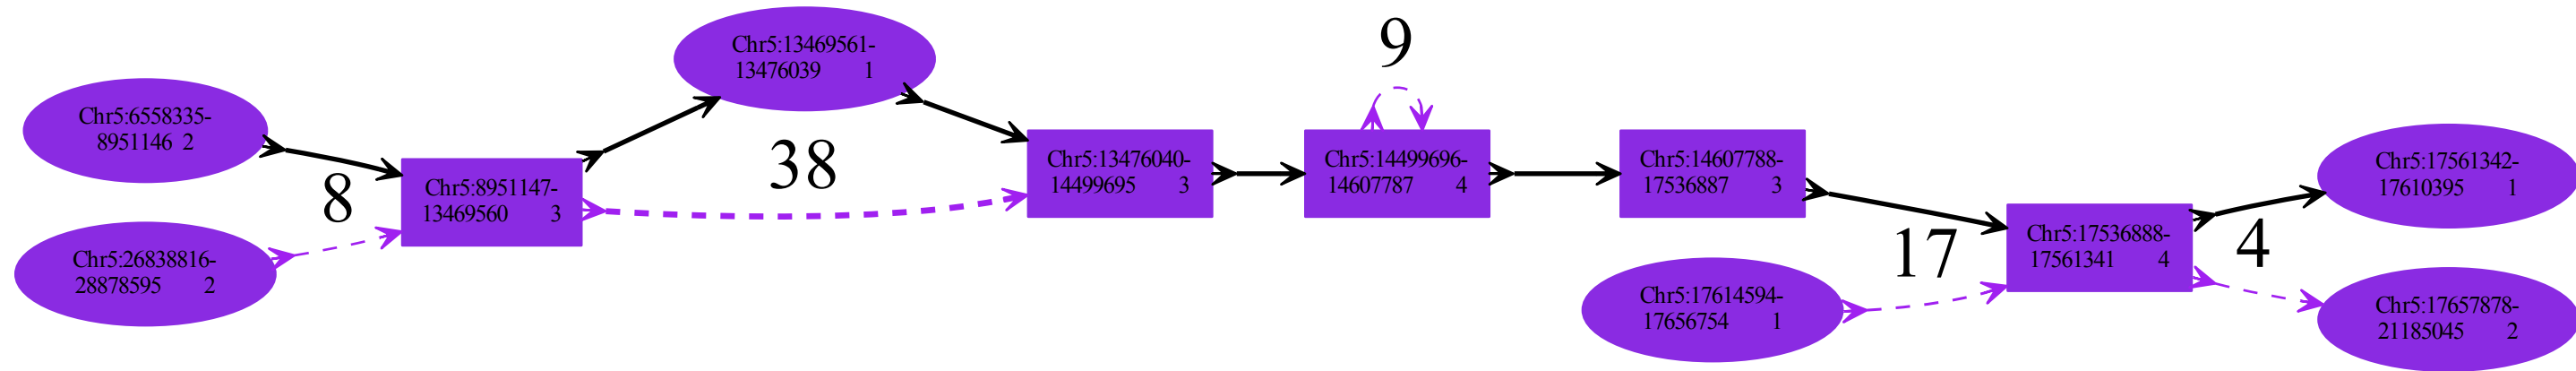

Supplement: S17 (10.1371/journal.pone.0046152.s017) [file journal.pone.0046152.s017]

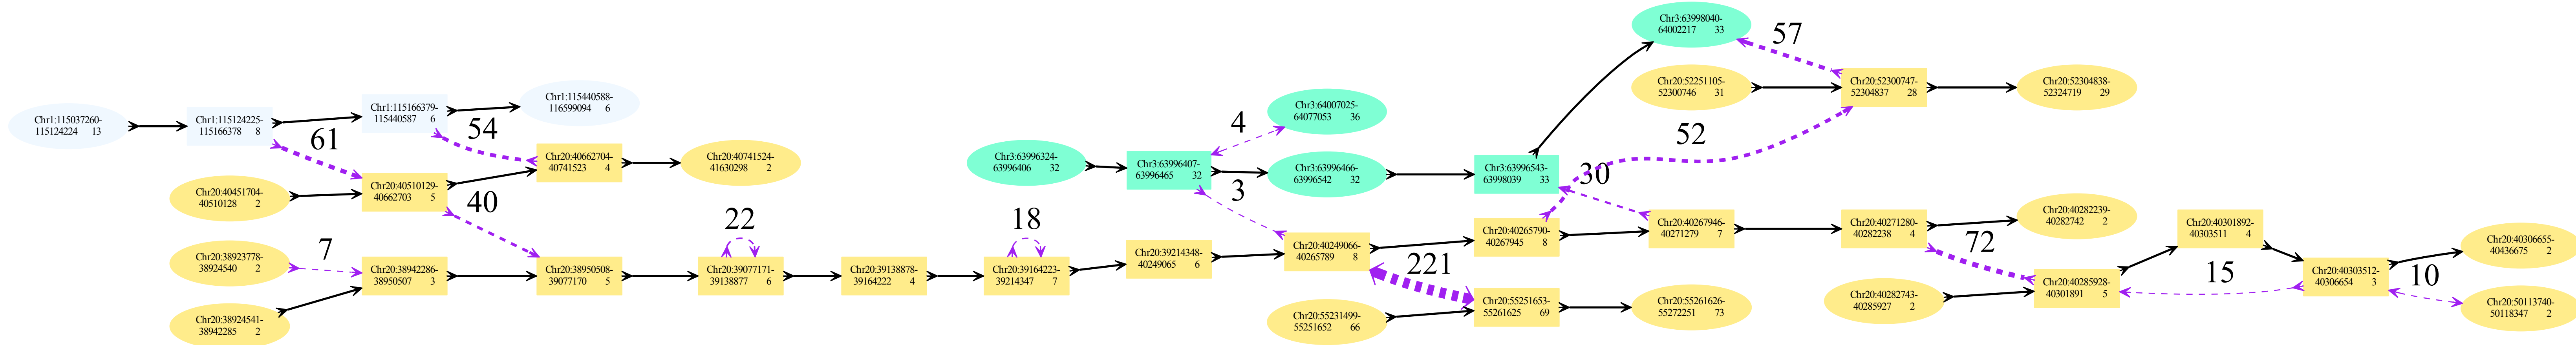

Supplement: S17 (10.1371/journal.pone.0046152.s017) [file journal.pone.0046152.s017]

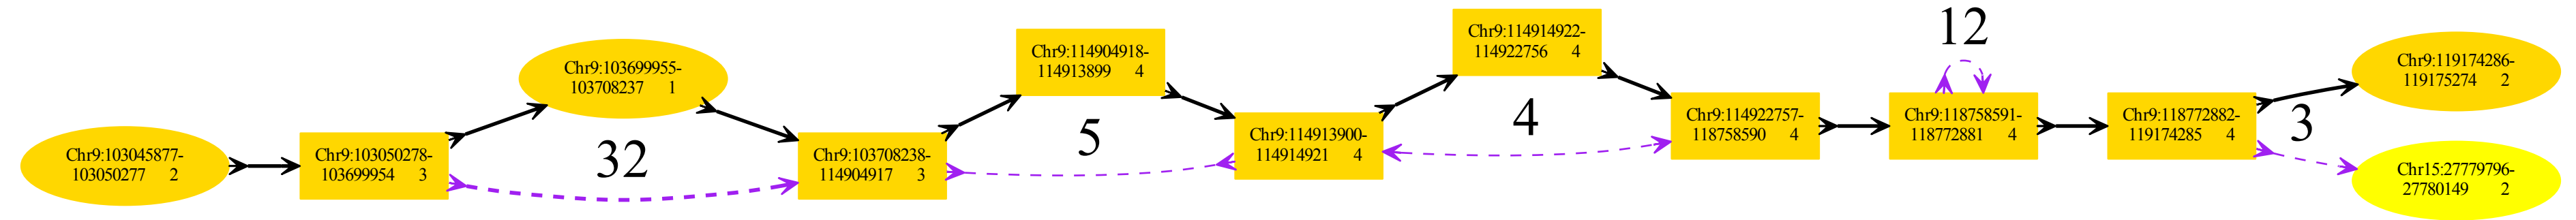

Supplement: S17 (10.1371/journal.pone.0046152.s017) [file journal.pone.0046152.s017]

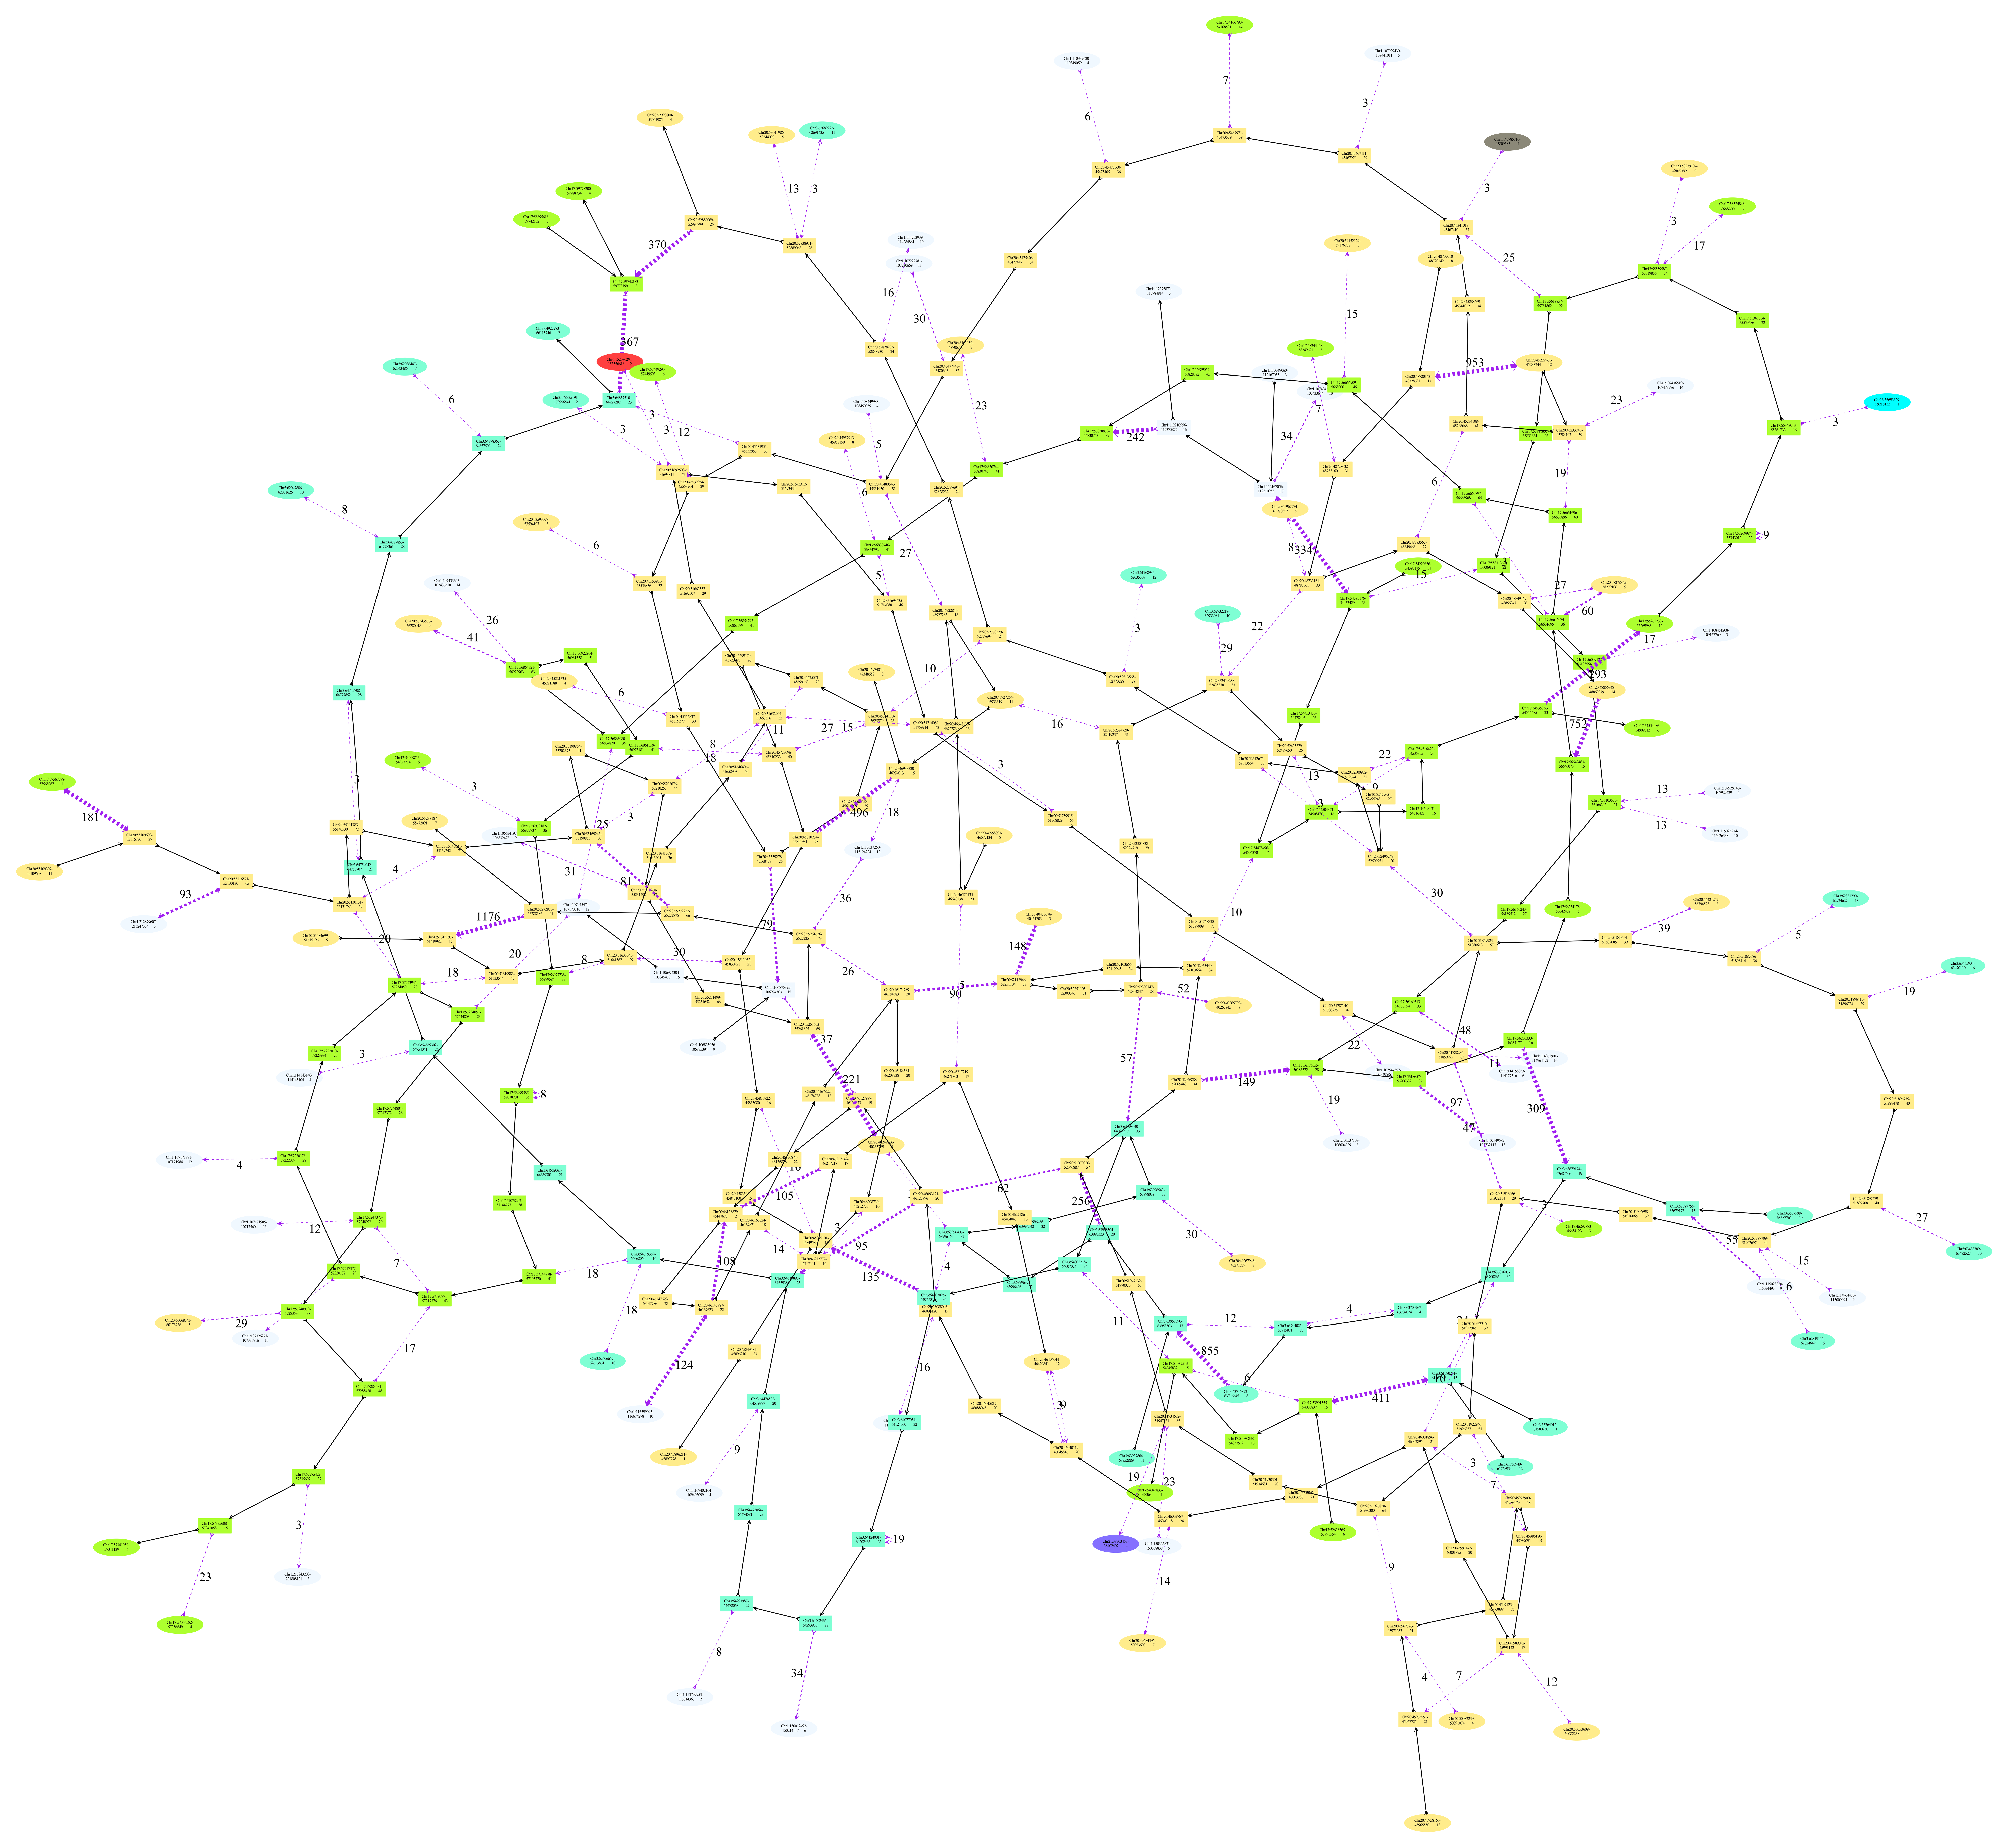

Supplement: S17 (10.1371/journal.pone.0046152.s017) [file journal.pone.0046152.s017]

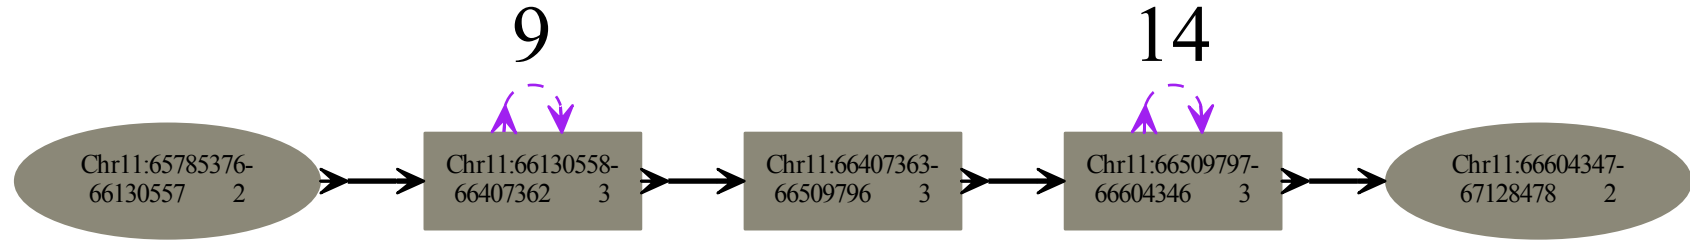

Supplement: S17 (10.1371/journal.pone.0046152.s017) [file journal.pone.0046152.s017]

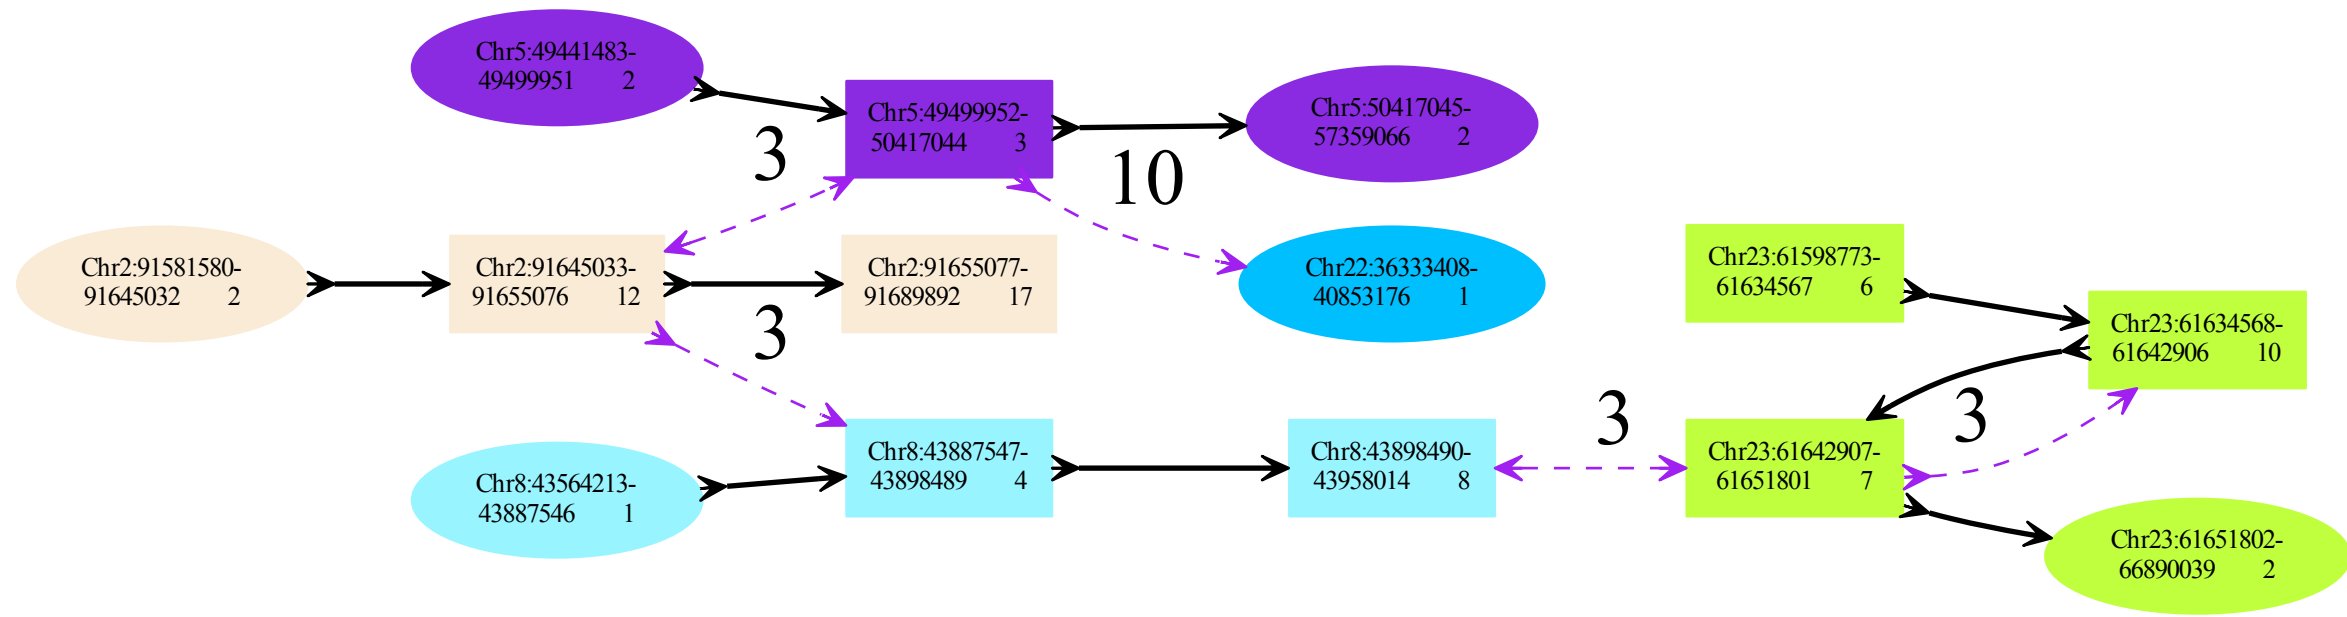

Supplement: S17 (10.1371/journal.pone.0046152.s017) [file journal.pone.0046152.s017]

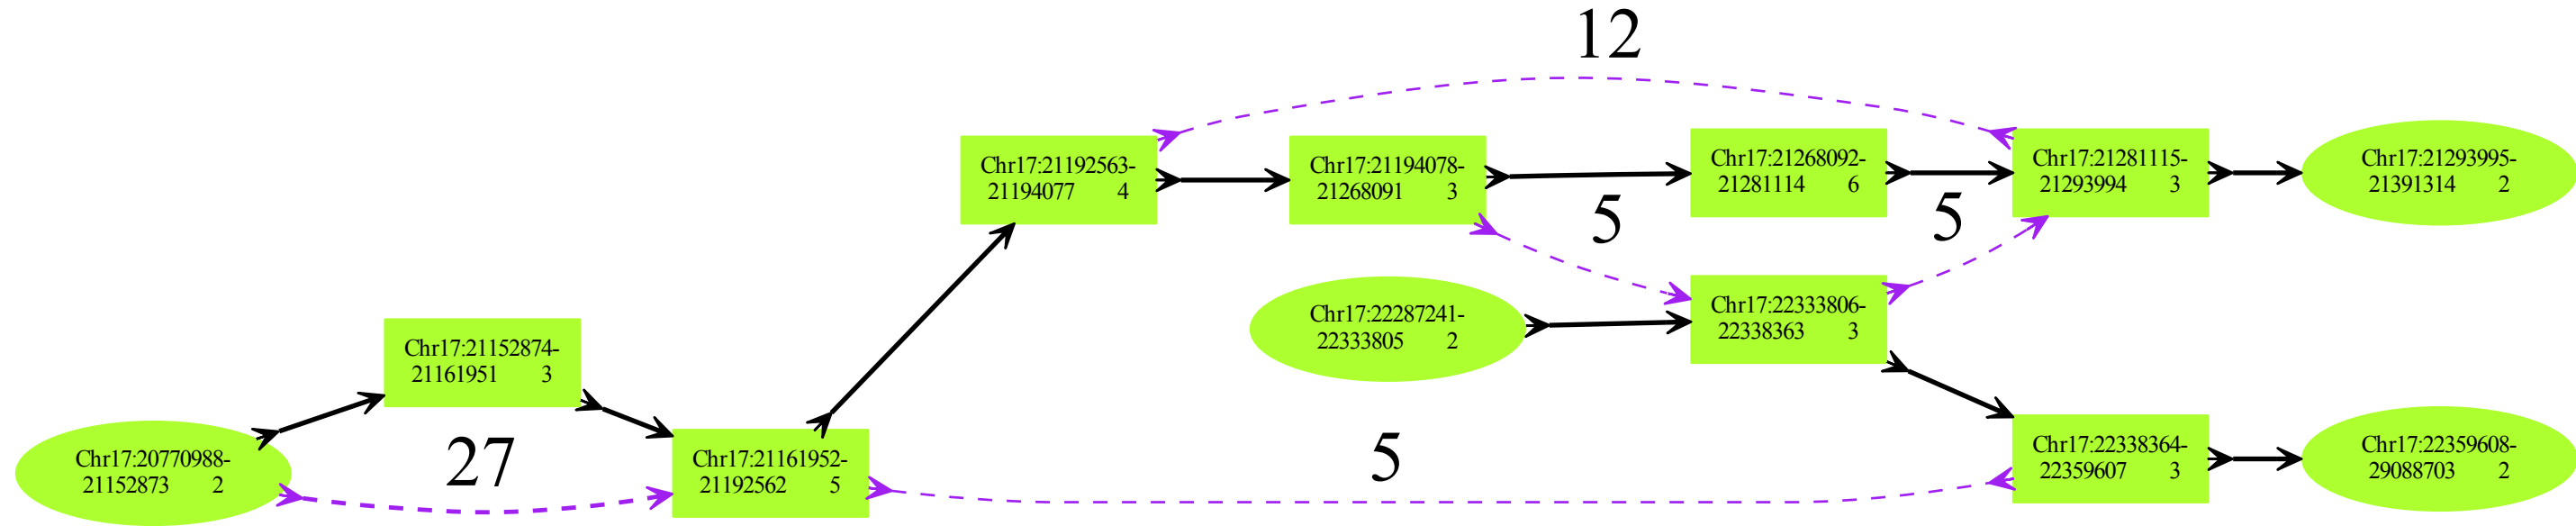

Supplement: S17 (10.1371/journal.pone.0046152.s017) [file journal.pone.0046152.s017]

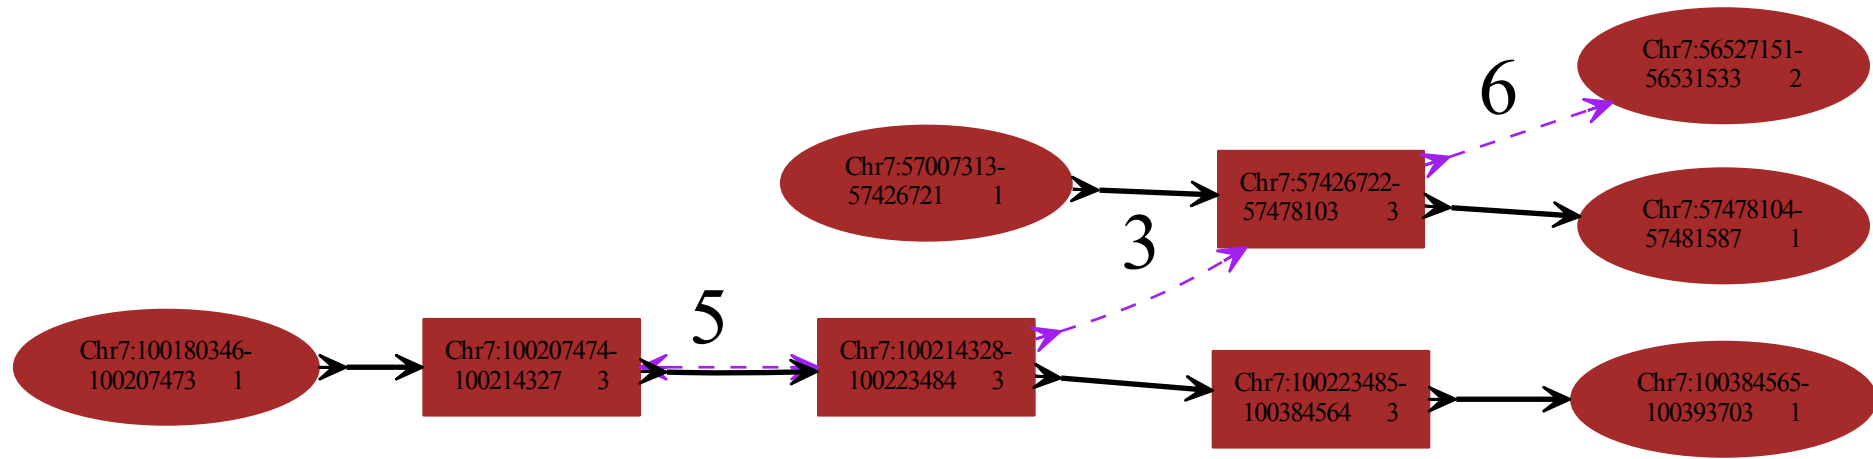

Supplement: S17 (10.1371/journal.pone.0046152.s017) [file journal.pone.0046152.s017]

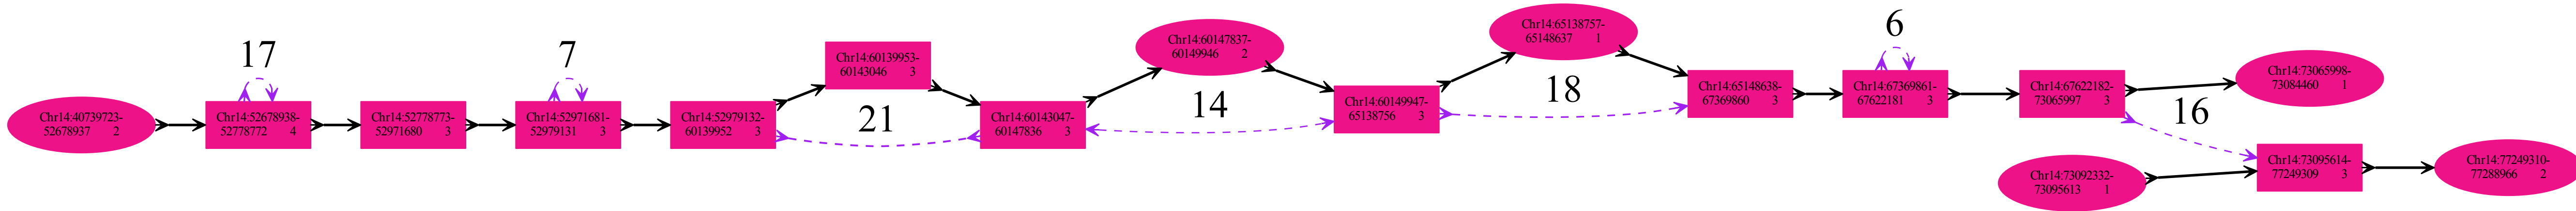

Supplement: S17 (10.1371/journal.pone.0046152.s017) [file journal.pone.0046152.s017]

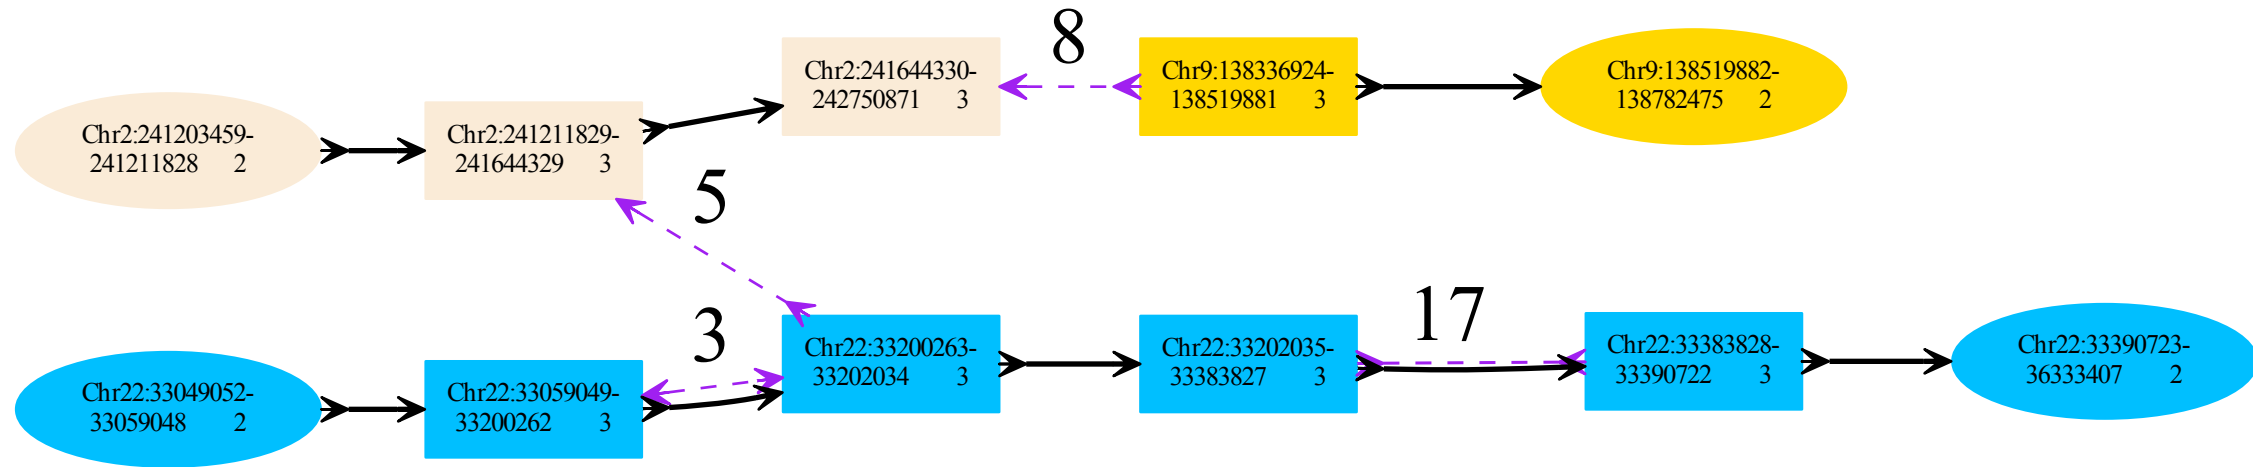

Supplement: S17 (10.1371/journal.pone.0046152.s017) [file journal.pone.0046152.s017]

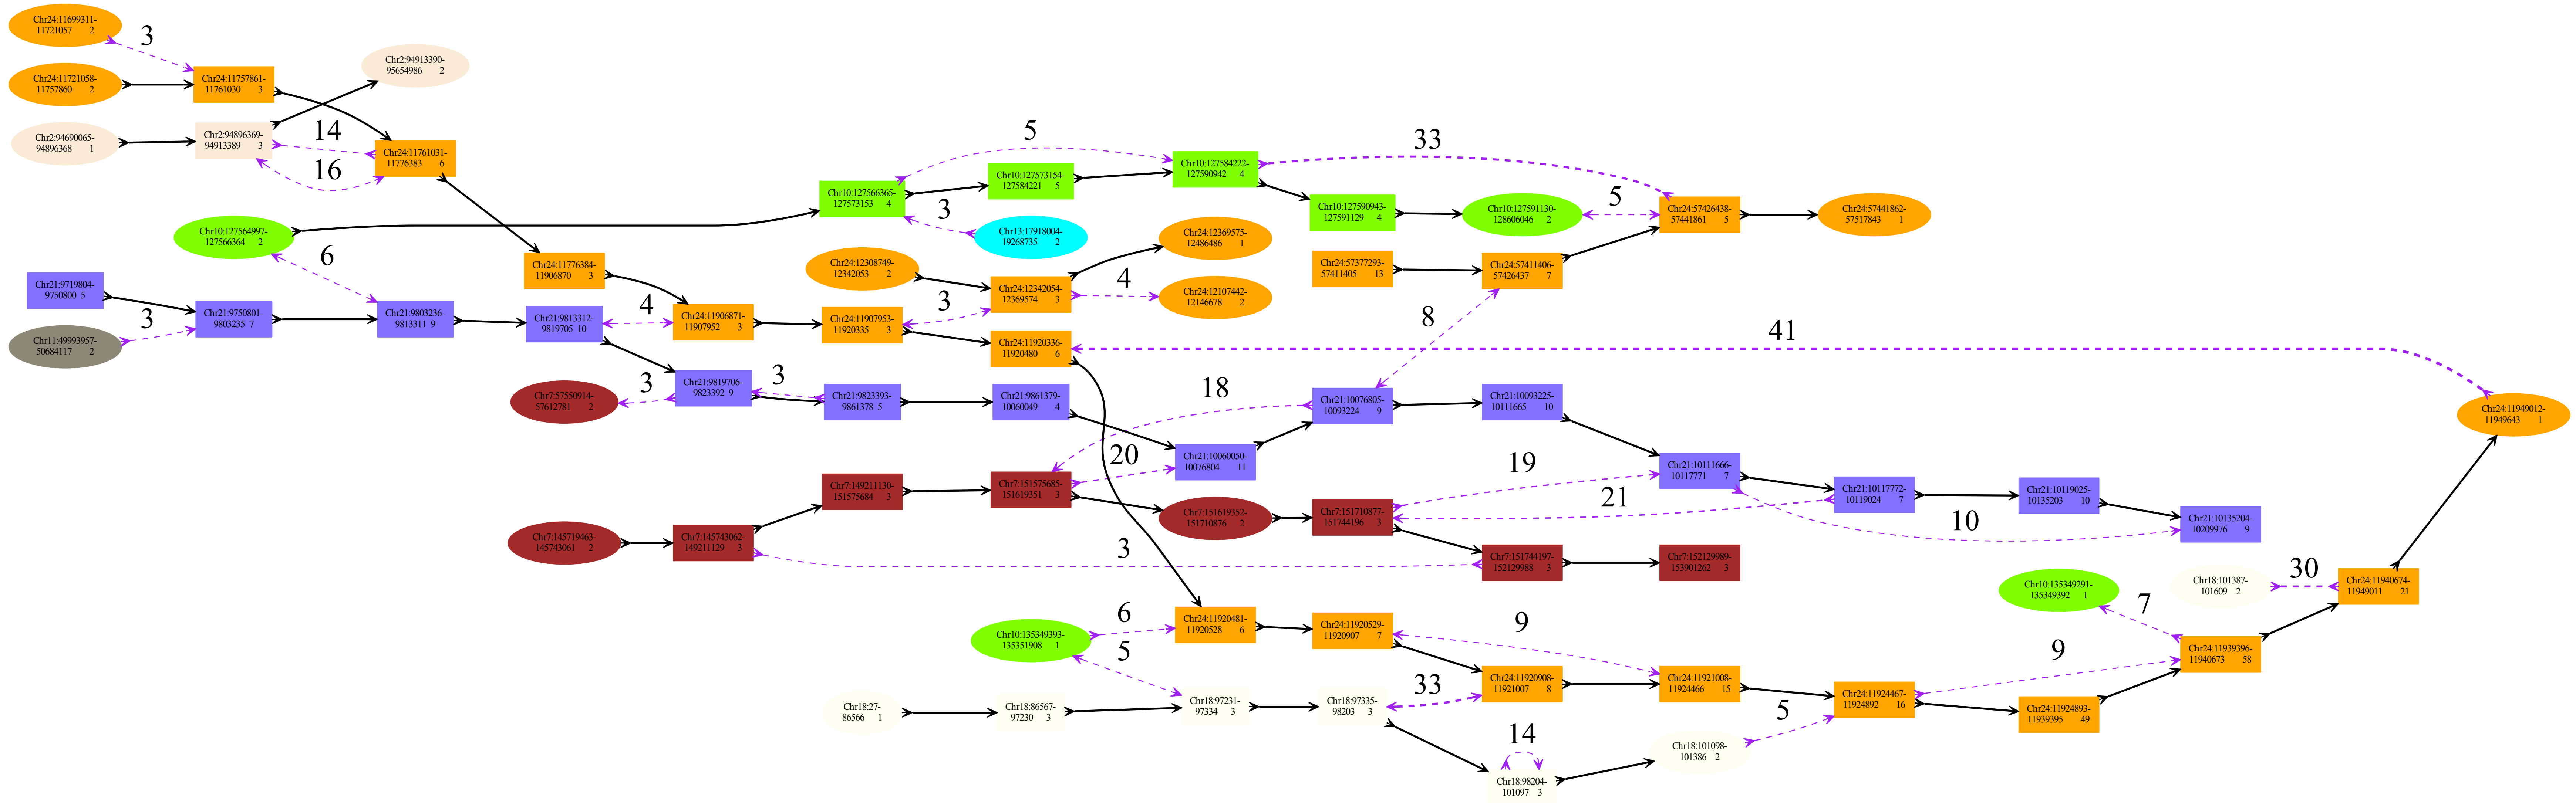

Supplement: S17 (10.1371/journal.pone.0046152.s017) [file journal.pone.0046152.s017]

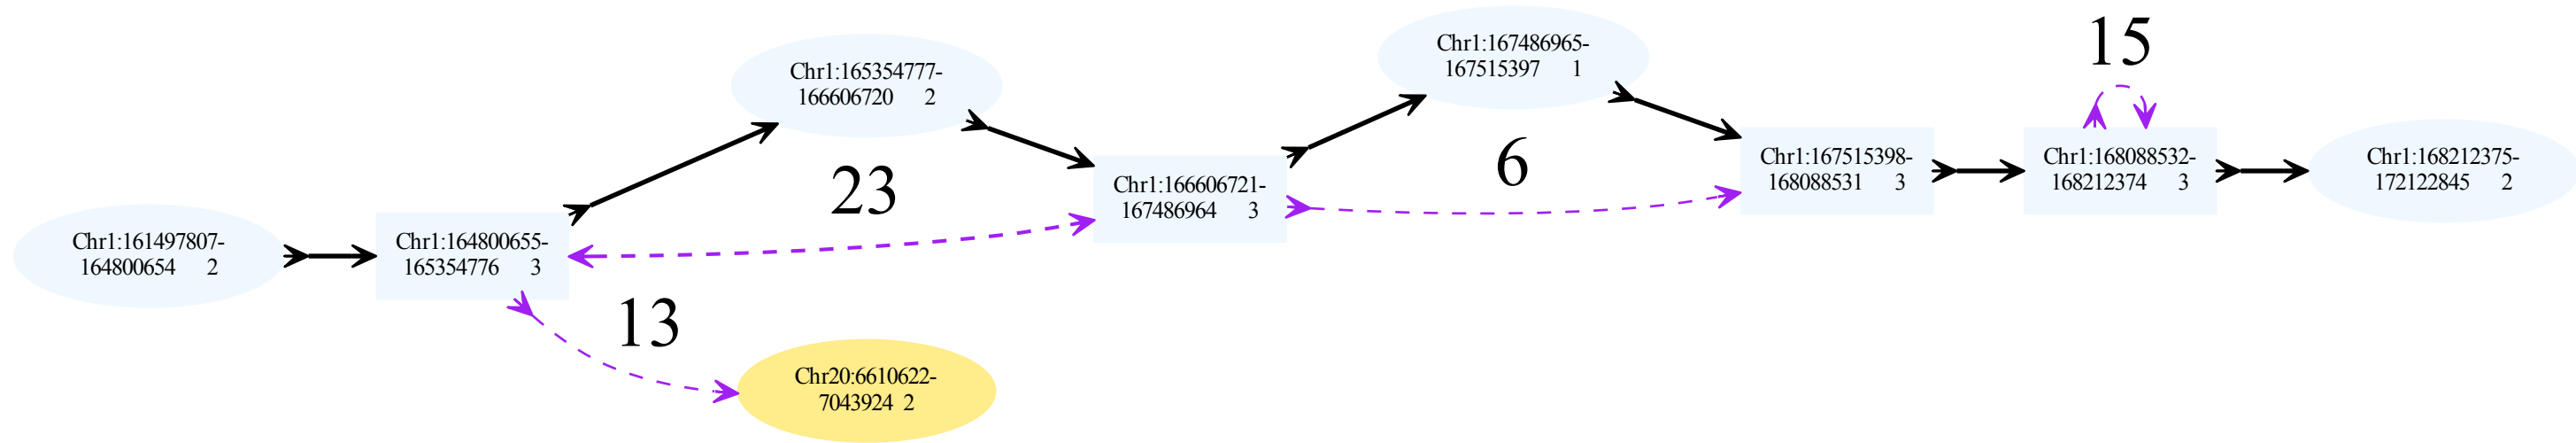

Supplement: S17 (10.1371/journal.pone.0046152.s017) [file journal.pone.0046152.s017]

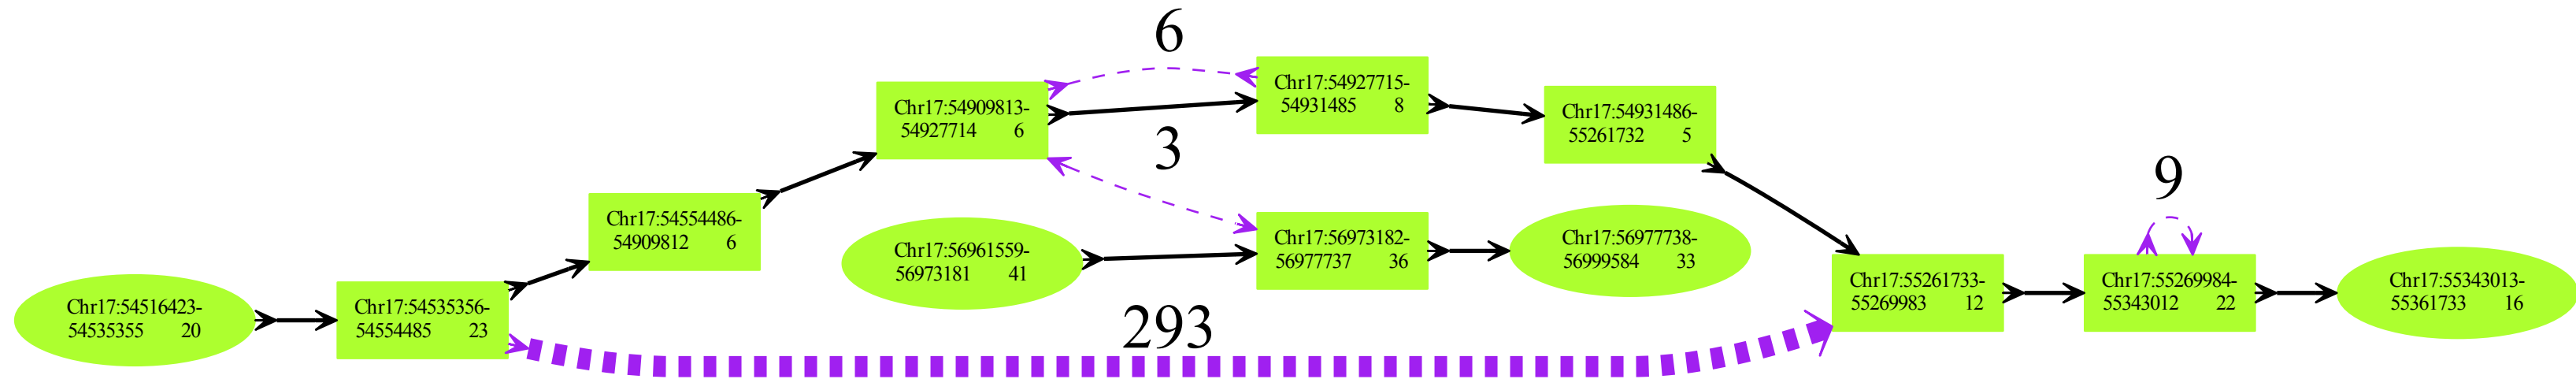

Supplement: S17 (10.1371/journal.pone.0046152.s017) [file journal.pone.0046152.s017]

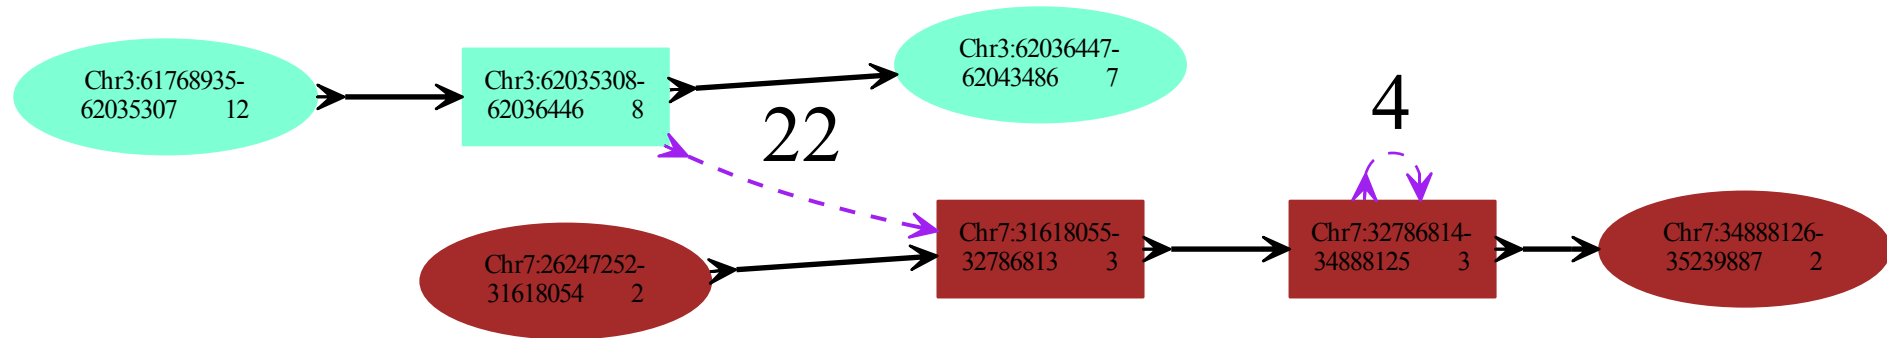

Supplement: S17 (10.1371/journal.pone.0046152.s017) [file journal.pone.0046152.s017]

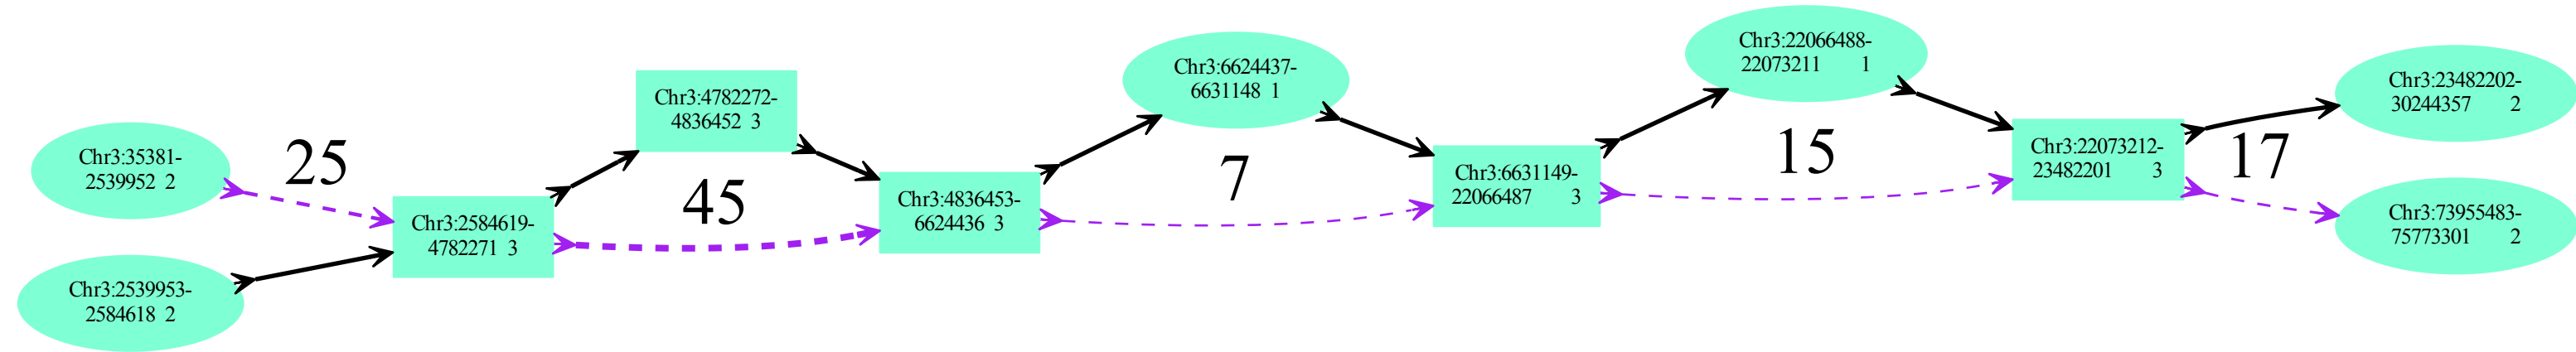

Supplement: S17 (10.1371/journal.pone.0046152.s017) [file journal.pone.0046152.s017]
